# Supplementary material for: Prevention of antimicrobial prescribing among infants following maternal vaccination against respiratory syncytial virus
Source: PubMed Central journal article supplement — Proc Natl Acad Sci U S A. 2022 Mar 14;119(12):e2112410119. doi: 10.1073/pnas.2112410119 (PMC8944586; doi:10.1073/pnas.2112410119), 2022-03-14
Supplement: pnas.2112410119.sapp.pdf [file pnas.2112410119.sapp.pdf]

## SUPPORTING INFORMATION

Prevention of antimicrobial prescribing among infants following maternal vaccination against respiratory syncytial virus

Joseph A. Lewnard<sup>1,2,3,\*</sup>, Louis F. Fries<sup>4</sup>, Iksung Cho<sup>4</sup>, Janice Chen<sup>4</sup>, Ramanan Laxminarayan<sup>5,6</sup>

1. Division of Epidemiology, School of Public Health, University of California, Berkeley, Berkeley, California, United States
2. Division of Infectious Diseases & Vaccinology, School of Public Health, University of California, Berkeley, Berkeley, California, United States
3. Center for Computational Biology, College of Engineering, University of California, Berkeley, Berkeley, California, United States
4. Novavax, Gaithersburg, Maryland, United States
5. Center for Disease Dynamics, Economics & Policy, New Delhi, India
6. Princeton University, Princeton, New Jersey, United States

\* Corresponding author: Joseph Lewnard; 2121 Berkeley Way, Room 5410, Berkeley, California 94720; Tel.: +1 (510) 664-4050; Email: [jlwnard@berkeley.edu](mailto:jlwnard@berkeley.edu)

## CONTENTS OF THIS SUPPLEMENT

| <u>Item</u> | <u>Title</u>                                                                                                                                                    | <u>Page</u> |
|-------------|-----------------------------------------------------------------------------------------------------------------------------------------------------------------|-------------|
| Table S1    | Vaccine efficacy against antimicrobial prescriptions for differing respiratory tract infection endpoints among infants within the intention-to-treat population | 2           |
| Table S2    | Incidence of antimicrobial prescribing for various clinical syndromes among infants, by country                                                                 | 3           |
| Table S3    | Causes of antimicrobial prescribing for various drug classes among infants in the US, South Africa, and other settings                                          | 5           |
| Table S4    | Vaccine efficacy against prescribing for various syndromes among infants in the US, South Africa, and other settings                                            | 8           |
| Table S5    | Incidence of antimicrobial prescribing among infants, by country and drug class                                                                                 | 9           |
| Table S6    | Vaccine efficacy against antimicrobial prescribing for various drug classes among infants in the US, South Africa, and other settings                           | 11          |
| Table S7    | Vaccine efficacy against antimicrobial prescription among maternal participants within the intention-to-treat population.                                       | 12          |
| Table S8    | Vaccine efficacy against antimicrobial prescription, by drug class, among maternal participants within the intention-to-treat population                        | 13          |
| Table S9    | Dates of enrollment in each trial location                                                                                                                      | 14          |
| Table S10   | Antimicrobial prescriptions among infants                                                                                                                       | 15          |
| Table S11   | Antimicrobial prescribing among maternal participants.                                                                                                          | 29          |
| Figure S1   | Incidence of new antimicrobial prescription courses among infants within the intention-to-treat population, by drug class and linked diagnosis type             | 43          |
| Figure S2   | Incidence of antimicrobial prescription courses among maternal participants within the intention-to-treat population, by setting and linked diagnosis type      | 44          |
| Figure S3   | Incidence of antimicrobial prescription courses among maternal participants within the intention-to-treat population, by drug class and linked diagnosis type   | 45          |

**Table S1: Vaccine efficacy against antimicrobial prescriptions for differing respiratory tract infection endpoints among infants within the intention-to-treat population.**

| Setting                          | Endpoint                                                        | Through 90d from birth                                                     |                                                                      |                      | Through end of follow-up                                                   |                                                                      |                    |
|----------------------------------|-----------------------------------------------------------------|----------------------------------------------------------------------------|----------------------------------------------------------------------|----------------------|----------------------------------------------------------------------------|----------------------------------------------------------------------|--------------------|
|                                  |                                                                 | RSV F Vaccine<br><i>no. of events per 100 person-years (no. of events)</i> | Placebo<br><i>no. of events per 100 person-years (no. of events)</i> | VE (95% CI)<br>%     | RSV F Vaccine<br><i>no. of events per 100 person-years (no. of events)</i> | Placebo<br><i>no. of events per 100 person-years (no. of events)</i> | VE (95% CI)<br>%   |
| All countries                    |                                                                 | <i>730 person-years</i>                                                    | <i>379 person-years</i>                                              |                      | <i>2908 person-years</i>                                                   | <i>1504 person-years</i>                                             |                    |
|                                  | All antimicrobial prescriptions for AOM                         | 2.7 (20)                                                                   | 4.8 (18)                                                             | 40.5 (–16.1, 69.5)   | 12.3 (359)                                                                 | 14.0 (210)                                                           | 8.8 (–13.9, 27.1)  |
|                                  | All antimicrobial prescriptions for respiratory tract infection | 92.9 (678)                                                                 | 100.9 (382)                                                          | 10.8 (–3.4, 23.0)    | 90.0 (2618)                                                                | 89.8 (1351)                                                          | 1.6 (–7.7, 10.2)   |
| High-income countries            |                                                                 | <i>242 person-years</i>                                                    | <i>132 person-years</i>                                              |                      | <i>953 person-years</i>                                                    | <i>516 person-years</i>                                              |                    |
|                                  | All antimicrobial prescriptions for AOM                         | 2.9 (7)                                                                    | 9.9 (13)                                                             | 71.3 (28.1, 88.6)    | 25.8 (246)                                                                 | 29.7 (153)                                                           | 14.8 (–12.6, 35.6) |
|                                  | All antimicrobial prescriptions for respiratory tract infection | 23.1 (56)                                                                  | 33.5 (44)                                                            | 28.0 (–11.4, 53.5)   | 46.8 (446)                                                                 | 49.2 (254)                                                           | 4.6 (–18.3, 23.1)  |
| Low- and middle-income countries |                                                                 | <i>488 person-years</i>                                                    | <i>247 person-years</i>                                              |                      | <i>1955 person-years</i>                                                   | <i>988 person-years</i>                                              |                    |
|                                  | All antimicrobial prescriptions for AOM                         | 2.7 (13)                                                                   | 2.0 (5)                                                              | –33.4 (–318.2, 57.5) | 5.8 (113)                                                                  | 5.8 (57)                                                             | –0.6 (–47.2, 31.2) |
|                                  | All antimicrobial prescriptions for respiratory tract infection | 127.5 (622)                                                                | 136.9 (338)                                                          | 8.0 (–7.6, 21.3)     | 111.1 (2172)                                                               | 111.0 (1097)                                                         | 0.6 (–9.9, 10.0)   |

**Table S2: Incidence of antimicrobial prescribing for various clinical syndromes among infants, by country.**

| Linked diagnosis | Setting                          | Through 90d from birth                                                 |                                                                  |                                                                        | Through end of follow-up                                               |                                                                  |                                                                        |                    |
|------------------|----------------------------------|------------------------------------------------------------------------|------------------------------------------------------------------|------------------------------------------------------------------------|------------------------------------------------------------------------|------------------------------------------------------------------|------------------------------------------------------------------------|--------------------|
|                  |                                  | RSV F Vaccine<br><i>no. of events per 100 children (no. of events)</i> | Placebo<br><i>no. of events per 100 children (no. of events)</i> | Averted incidence<br>(95% CI)<br><i>no. of events per 100 children</i> | RSV F Vaccine<br><i>no. of events per 100 children (no. of events)</i> | Placebo<br><i>no. of events per 100 children (no. of events)</i> | Averted incidence<br>(95% CI)<br><i>no. of events per 100 children</i> |                    |
| All syndromes    | Argentina                        | 40 person-years<br>22.6 (36)                                           | 20 person-years<br>30.1 (24)                                     | 7.5 (-16.1, 19.0)                                                      | 158 person-years<br>58.7 (93)                                          | 82 person-years<br>62.4 (51)                                     | 5.0 (-29.5, 26.6)                                                      |                    |
|                  | Australia                        | 18 person-years<br>9.7 (7)                                             | 10 person-years<br>17.8 (7)                                      | 8.1 (-13.0, 14.7)                                                      | 72 person-years<br>33.2 (24)                                           | 40 person-years<br>32.5 (13)                                     | 0.1 (-44.2, 18.8)                                                      |                    |
|                  | Bangladesh                       | 20 person-years<br>139.0 (111)                                         | 9 person-years<br>131.6 (48)                                     | -7.4 (-70.1, 35.7)                                                     | 82 person-years<br>339.4 (279)                                         | 37 person-years<br>331.2 (124)                                   | -9.3 (-123.5, 76.2)                                                    |                    |
|                  | Chile                            | 5 person-years<br>16.0 (3)                                             | 5 person-years<br>40.6 (8)                                       | 25.0 (-63.0, 38.2)                                                     | 19 person-years<br>42.4 (8)                                            | 20 person-years<br>74.5 (15)                                     | 32.0 (-90.3, 63.6)                                                     |                    |
|                  | Spain                            | 6 person-years<br>31.6 (8)                                             | 3 person-years<br>42.3 (5)                                       | 10.8 (-118.7, 36.1)                                                    | 25 person-years<br>87.8 (22)                                           | 12 person-years<br>76.4 (9)                                      | -11.6 (-191.6, 47.5)                                                   |                    |
|                  | Mexico                           | 2 person-years<br>0.0 (0)                                              | 1 person-year<br>50.7 (2)                                        | --                                                                     | 7 person-years<br>14.6 (1)                                             | 4 person-years<br>49.7 (2)                                       | 45.7 (-541.2, 49.7)                                                    |                    |
|                  | New Zealand                      | 36 person-years<br>18.8 (27)                                           | 22 person-years<br>26.7 (23)                                     | 7.8 (-15.6, 18.3)                                                      | 141 person-years<br>82.7 (117)                                         | 84 person-years<br>78.4 (66)                                     | -4.8 (-47.4, 23.4)                                                     |                    |
|                  | Philippines                      | 42 person-years<br>65.4 (110)                                          | 22 person-years<br>58.5 (51)                                     | -6.8 (-37.7, 14.2)                                                     | 174 person-years<br>228.2 (396)                                        | 89 person-years<br>197.9 (177)                                   | -36.4 (-100.7, 14.0)                                                   |                    |
|                  | United Kingdom                   | 5 person-years<br>19.3 (4)                                             | 3 person-years<br>18.4 (2)                                       | -1.4 (-89.8, 14.8)                                                     | 21 person-years<br>28.1 (6)                                            | 11 person-years<br>46.1 (5)                                      | 17.5 (-47.7, 37.4)                                                     |                    |
|                  | United States                    | 172 person-years<br>12.5 (86)                                          | 90 person-years<br>14.0 (50)                                     | 1.4 (-4.6, 5.5)                                                        | 675 person-years<br>62.5 (422)                                         | 349 person-years<br>66.7 (233)                                   | 4.2 (-11.6, 16.9)                                                      |                    |
|                  | South Africa                     | 384 person-years<br>38.0 (584)                                         | 195 person-years<br>43.9 (343)                                   | 5.9 (-0.7, 11.6)                                                       | 1534 person-years<br>121.7 (1866)                                      | 775 person-years<br>129.1 (100)                                  | 7.0 (-6.8, 19.4)                                                       |                    |
|                  | All respiratory tract infections | Argentina                                                              | 14.4 (23)                                                        | 25.1 (20)                                                              | 10.6 (-9.2, 19.0)                                                      | 45.5 (72)                                                        | 50.2 (41)                                                              | 5.7 (-25.9, 24.2)  |
|                  |                                  | Australia                                                              | 1.4 (1)                                                          | 2.5 (1)                                                                | 1.1 (-19.7, 2.4)                                                       | 15.2 (11)                                                        | 15.0 (6)                                                               | -0.2 (-32.3, 10.1) |
|                  |                                  | Bangladesh                                                             | 71.4 (57)                                                        | 65.8 (24)                                                              | -5.4 (-51.7, 22.7)                                                     | 184.9 (152)                                                      | 197.7 (74)                                                             | 12.2 (-64.9, 66.7) |
| Chile            |                                  | 16.0 (3)                                                               | 20.3 (4)                                                         | 4.3 (-87.1, 17.9)                                                      | 42.4 (8)                                                               | 44.7 (9)                                                         | 3.0 (-151.1, 35.9)                                                     |                    |
| Spain            |                                  | 4.0 (1)                                                                | 8.5 (1)                                                          | 4.4 (-56.4, 8.2)                                                       | 43.9 (11)                                                              | 25.5 (3)                                                         | -19.4 (-188.1, 16.1)                                                   |                    |
| Mexico           |                                  | 0.0 (0)                                                                | 50.7 (2)                                                         | --                                                                     | 14.6 (1)                                                               | 49.7 (2)                                                         | 45.7 (-541.2, 49.7)                                                    |                    |
| New Zealand      |                                  | 7.7 (11)                                                               | 12.8 (11)                                                        | 5.1 (-7.8, 9.9)                                                        | 57.3 (81)                                                              | 55.8 (47)                                                        | -1.8 (-37.0, 20.0)                                                     |                    |
| Philippines      |                                  | 42.2 (71)                                                              | 37.9 (33)                                                        | -4.4 (-31.4, 12.0)                                                     | 185.6 (322)                                                            | 148.7 (133)                                                      | -42.5 (-103.1, 3.6)                                                    |                    |
| United Kingdom   |                                  | 4.8 (1)                                                                | 0.0 (0)                                                          | --                                                                     | 9.4 (2)                                                                | 9.2 (1)                                                          | -0.3 (-302.1, 8.9)                                                     |                    |
| United States    |                                  | 5.7 (39)                                                               | 7.5 (27)                                                         | 1.9 (-2.1, 4.2)                                                        | 49.3 (333)                                                             | 53.8 (188)                                                       | 4.4 (-9.9, 15.5)                                                       |                    |
| South Africa     |                                  | 30.6 (471)                                                             | 33.2 (259)                                                       | 2.5 (-3.4, 7.5)                                                        | 106.0 (1625)                                                           | 109.2 (847)                                                      | 3.0 (-9.8, 14.4)                                                       |                    |
| LRTI             | Argentina                        | 13.8 (22)                                                              | 25.1 (20)                                                        | 11.3 (-8.2, 19.3)                                                      | 37.3 (59)                                                              | 45.3 (37)                                                        | 8.9 (-19.8, 25.0)                                                      |                    |
|                  | Australia                        | 0.0 (0)                                                                | 2.5 (1)                                                          | --                                                                     | 5.5 (4)                                                                | 7.5 (3)                                                          | 1.9 (-22.6, 6.5)                                                       |                    |

|     |                |            |            |                    |             |             |                     |
|-----|----------------|------------|------------|--------------------|-------------|-------------|---------------------|
|     | Bangladesh     | 43.8 (35)  | 43.9 (16)  | 0.0 (-43.9, 21.9)  | 96.1 (79)   | 109.5 (41)  | 13.0 (-38.4, 46.5)  |
|     | Chile          | 10.7 (2)   | 15.2 (3)   | 4.5 (-164.8, 14.6) | 31.8 (6)    | 34.8 (7)    | 3.4 (-151.6, 29.5)  |
|     | Spain          | 4.0 (1)    | 0.0 (0)    | --                 | 12.0 (3)    | 0.0 (0)     | --                  |
|     | Mexico         | 0.0 (0)    | 50.7 (2)   | --                 | 0.0 (0)     | 49.7 (2)    | --                  |
|     | New Zealand    | 6.3 (9)    | 7.0 (6)    | 0.6 (-18.5, 5.4)   | 22.6 (32)   | 23.8 (20)   | 1.1 (-23.7, 13.0)   |
|     | Philippines    | 36.2 (61)  | 34.4 (30)  | -1.9 (-27.6, 13.1) | 147.5 (256) | 124.1 (111) | -28.5 (-86.2, 13.3) |
|     | United Kingdom | 4.8 (1)    | 0.0 (0)    | --                 | 9.4 (2)     | 0.0 (0)     | --                  |
|     | United States  | 1.7 (12)   | 4.7 (17)   | 3.0 (0.9, 4.0)     | 7.7 (52)    | 10.0 (35)   | 2.3 (-3.2, 5.5)     |
|     | South Africa   | 24.4 (375) | 27.7 (216) | 3.3 (-1.9, 7.6)    | 85.0 (1304) | 88.1 (683)  | 2.8 (-8.6, 12.7)    |
| AOM | Argentina      | 0.0 (0)    | 0.0 (0)    | --                 | 3.8 (6)     | 2.4 (2)     | -1.3 (-19.2, 1.8)   |
|     | Australia      | 0.0 (0)    | 0.0 (0)    | --                 | 6.9 (5)     | 7.5 (3)     | 0.6 (-27.5, 6.1)    |
|     | Bangladesh     | 0.0 (0)    | 0.0 (0)    | --                 | 6.1 (5)     | 0.0 (0)     | --                  |
|     | Chile          | 0.0 (0)    | 0.0 (0)    | --                 | 5.3 (1)     | 0.0 (0)     | --                  |
|     | Spain          | 0.0 (0)    | 8.5 (1)    | --                 | 23.9 (6)    | 17.0 (2)    | -7.5 (-148.2, 13.4) |
|     | Mexico         | 0.0 (0)    | 0.0 (0)    | --                 | 14.6 (1)    | 0.0 (0)     | --                  |
|     | New Zealand    | 0.7 (1)    | 3.5 (3)    | 2.8 (-3.2, 3.4)    | 17.0 (24)   | 17.8 (15)   | 0.5 (-20.7, 10.0)   |
|     | Philippines    | 0.6 (1)    | 0.0 (0)    | --                 | 2.9 (5)     | 2.2 (2)     | -0.7 (-16.5, 1.8)   |
|     | United Kingdom | 0.0 (0)    | 0.0 (0)    | --                 | 0.0 (0)     | 9.2 (1)     | --                  |
|     | United States  | 0.9 (6)    | 2.5 (9)    | 1.6 (0.1, 2.2)     | 31.1 (210)  | 37.8 (132)  | 6.7 (-5.8, 15.6)    |
|     | South Africa   | 0.8 (12)   | 0.6 (5)    | -0.1 (-1.9, 0.4)   | 6.3 (96)    | 6.8 (53)    | 0.6 (-2.5, 2.7)     |

**Table S3: Causes of antimicrobial prescribing for various drug classes among infants in the US, South Africa, and other settings.**

| Setting                     | Drug class           | Clinical syndrome               | Observations through 90d from birth                       |      |                                                           |      | Observations through end of follow-up                     |      |                                                           |      |
|-----------------------------|----------------------|---------------------------------|-----------------------------------------------------------|------|-----------------------------------------------------------|------|-----------------------------------------------------------|------|-----------------------------------------------------------|------|
|                             |                      |                                 | RSV F vaccine                                             |      | Placebo                                                   |      | RSV F vaccine                                             |      | Placebo                                                   |      |
|                             |                      |                                 | <i>no. of events per 100 person-years (no. of events)</i> | %    | <i>no. of events per 100 person-years (no. of events)</i> | %    | <i>no. of events per 100 person-years (no. of events)</i> | %    | <i>no. of events per 100 person-years (no. of events)</i> | %    |
| United States               | Penicillins          | Any                             | 19.8 (34)                                                 | --   | 34.6 (31)                                                 | --   | 35.3 (238)                                                | --   | 42.7 (149)                                                | --   |
|                             |                      | Any respiratory tract infection | 8.7 (15)                                                  | 44.1 | 20.1 (18)                                                 | 58.1 | 31.9 (215)                                                | 90.3 | 36.9 (129)                                                | 86.6 |
|                             |                      | LRTI                            | 3.5 (6)                                                   | 17.6 | 10.0 (9)                                                  | 29.0 | 4.0 (27)                                                  | 11.3 | 5.2 (18)                                                  | 12.1 |
|                             |                      | AOM                             | 2.3 (4)                                                   | 11.8 | 8.9 (8)                                                   | 25.8 | 23.4 (158)                                                | 66.4 | 28.4 (99)                                                 | 66.4 |
|                             | Cephalosporins       | Any                             | 8.7 (15)                                                  | --   | 10.0 (9)                                                  | --   | 15.0 (101)                                                | --   | 14.6 (51)                                                 | --   |
|                             |                      | Any respiratory tract infection | 1.7 (3)                                                   | 20.0 | 7.8 (7)                                                   | 77.8 | 10.4 (70)                                                 | 69.3 | 11.5 (40)                                                 | 78.4 |
|                             |                      | LRTI                            | 0.6 (1)                                                   | 6.7  | 7.8 (7)                                                   | 77.8 | 1.5 (10)                                                  | 9.9  | 3.2 (11)                                                  | 21.6 |
|                             |                      | AOM                             | 0.6 (1)                                                   | 6.7  | 1.1 (1)                                                   | 11.1 | 7.3 (49)                                                  | 48.5 | 7.7 (27)                                                  | 52.9 |
|                             | Macrolides           | Any                             | 6.4 (11)                                                  | --   | 5.6 (5)                                                   | --   | 4.7 (32)                                                  | --   | 4.3 (15)                                                  | --   |
|                             |                      | Any respiratory tract infection | 5.2 (9)                                                   | 81.8 | 4.5 (4)                                                   | 80.0 | 4.4 (30)                                                  | 93.8 | 3.4 (12)                                                  | 80.0 |
|                             |                      | LRTI                            | 1.7 (3)                                                   | 27.3 | 4.5 (4)                                                   | 80.0 | 2.2 (15)                                                  | 46.9 | 2.0 (7)                                                   | 46.7 |
|                             |                      | AOM                             | 0.6 (1)                                                   | 9.1  | 1.1 (1)                                                   | 20.0 | 0.9 (6)                                                   | 18.8 | 1.4 (5)                                                   | 33.3 |
|                             | Aminoglycosides      | Any                             | 11.0 (19)                                                 | --   | 13.4 (12)                                                 | --   | 3.0 (20)                                                  | --   | 3.7 (13)                                                  | --   |
|                             |                      | Any respiratory tract infection | 1.2 (2)                                                   | 10.5 | 2.2 (2)                                                   | 16.7 | 0.4 (3)                                                   | 15.0 | 0.9 (3)                                                   | 23.1 |
|                             |                      | LRTI                            | 1.2 (2)                                                   | 10.5 | 1.1 (1)                                                   | 8.3  | 0.3 (2)                                                   | 10.0 | 0.3 (1)                                                   | 7.7  |
|                             |                      | AOM                             | 0.0 (0)                                                   | 0.0  | 0.0 (0)                                                   | 0.0  | 0.0 (0)                                                   | 0.0  | 0.0 (0)                                                   | 0.0  |
|                             | Other antibiotics    | Any                             | 16.9 (29)                                                 | --   | 13.4 (12)                                                 | --   | 10.4 (70)                                                 | --   | 8.3 (29)                                                  | --   |
|                             |                      | Any respiratory tract infection | 7.0 (12)                                                  | 41.4 | 2.2 (2)                                                   | 16.7 | 4.6 (31)                                                  | 44.3 | 3.7 (13)                                                  | 44.8 |
|                             |                      | LRTI                            | 1.2 (2)                                                   | 6.9  | 0.0 (0)                                                   | 0.0  | 0.4 (3)                                                   | 4.3  | 0.9 (3)                                                   | 10.3 |
|                             |                      | AOM                             | 0.0 (0)                                                   | 0.0  | 0.0 (0)                                                   | 0.0  | 0.1 (1)                                                   | 1.4  | 0.6 (2)                                                   | 6.9  |
|                             | Other antimicrobials | Any                             | 11.0 (19)                                                 | --   | 13.4 (12)                                                 | --   | 3.0 (20)                                                  | --   | 3.7 (13)                                                  | --   |
|                             |                      | Any respiratory tract infection | 1.2 (2)                                                   | 10.5 | 2.2 (2)                                                   | 16.7 | 0.4 (3)                                                   | 15.0 | 0.9 (3)                                                   | 23.1 |
|                             |                      | LRTI                            | 1.2 (2)                                                   | 10.5 | 1.1 (1)                                                   | 8.3  | 0.3 (2)                                                   | 10.0 | 0.3 (1)                                                   | 7.7  |
|                             |                      | AOM                             | 0.0 (0)                                                   | 0.0  | 0.0 (0)                                                   | 0.0  | 0.0 (0)                                                   | 0.0  | 0.0 (0)                                                   | 0.0  |
| Other high-income countries | Penicillins          | Any                             | 42.8 (30)                                                 | --   | 69.1 (29)                                                 | --   | 44.8 (125)                                                | --   | 46.1 (77)                                                 | --   |
|                             |                      | Any respiratory tract infection | 15.7 (11)                                                 | 36.7 | 40.5 (17)                                                 | 58.6 | 31.9 (89)                                                 | 71.2 | 34.2 (57)                                                 | 74.0 |
|                             |                      | LRTI                            | 11.4 (8)                                                  | 26.7 | 23.8 (10)                                                 | 34.5 | 11.8 (33)                                                 | 26.4 | 14.4 (24)                                                 | 31.2 |
|                             |                      | AOM                             | 1.4 (1)                                                   | 3.3  | 9.5 (4)                                                   | 13.8 | 11.8 (33)                                                 | 26.4 | 11.4 (19)                                                 | 24.7 |
|                             | Cephalosporins       | Any                             | 18.5 (13)                                                 | --   | 26.2 (11)                                                 | --   | 10.4 (29)                                                 | --   | 11.4 (19)                                                 | --   |
|                             |                      | Any respiratory tract infection | 8.6 (6)                                                   | 46.2 | 4.8 (2)                                                   | 18.2 | 5.0 (14)                                                  | 48.3 | 3.6 (6)                                                   | 31.6 |
|                             |                      | LRTI                            | 5.7 (4)                                                   | 30.8 | 4.8 (2)                                                   | 18.2 | 2.5 (7)                                                   | 24.1 | 2.4 (4)                                                   | 21.1 |
|                             |                      | AOM                             | 0.0 (0)                                                   | 0.0  | 0.0 (0)                                                   | 0.0  | 0.4 (1)                                                   | 3.4  | 0.6 (1)                                                   | 5.3  |
|                             | Macrolides           | Any                             | 5.4 (4)                                                   | --   | 0.0 (0)                                                   | --   | 4.3 (12)                                                  | --   | 1.2 (2)                                                   | --   |
|                             |                      | Any respiratory tract infection | 4.3 (3)                                                   | 75.0 | 0.0 (0)                                                   | --   | 3.9 (11)                                                  | 91.7 | 1.2 (2)                                                   | 100  |
|                             |                      | LRTI                            | 4.3 (3)                                                   | 75.0 | 0.0 (0)                                                   | --   | 3.2 (9)                                                   | 75.0 | 0.6 (1)                                                   | 50.0 |

|                                        |                                 |                                 |             |           |             |            |              |            |             |      |
|----------------------------------------|---------------------------------|---------------------------------|-------------|-----------|-------------|------------|--------------|------------|-------------|------|
| South Africa                           | Aminoglycosides                 | AOM                             | 0.0 (0)     | 0.0       | 0.0 (0)     | --         | 0.4 (1)      | 8.3        | 0.6 (1)     | 50.0 |
|                                        |                                 | Any                             | 17.1 (12)   | --        | 21.5 (9)    | --         | 4.3 (12)     | --         | 5.4 (9)     | --   |
|                                        |                                 | Any respiratory tract infection | 2.9 (2)     | 16.7      | 7.2 (3)     | 33.3       | 0.7 (2)      | 16.7       | 1.8 (3)     | 33.3 |
|                                        |                                 | LRTI                            | 2.9 (2)     | 16.7      | 7.2 (3)     | 33.3       | 0.7 (2)      | 16.7       | 1.8 (3)     | 33.3 |
|                                        | Other antibiotics               | AOM                             | 0.0 (0)     | 0.0       | 0.0 (0)     | 0.0        | 0.0 (0)      | 0.0        | 0.0 (0)     | 0.0  |
|                                        |                                 | Any                             | 14.3 (10)   | --        | 40.5 (17)   | --         | 6.8 (19)     | --         | 13.2 (22)   | --   |
|                                        |                                 | Any respiratory tract infection | 0.0 (0)     | 0.0       | 2.4 (1)     | 5.9        | 0.7 (2)      | 10.5       | 2.4 (4)     | 18.2 |
|                                        |                                 | LRTI                            | 0.0 (0)     | 0.0       | 2.4 (1)     | 5.9        | 0.0 (0)      | 0.0        | 2.4 (4)     | 18.2 |
|                                        | Other antimicrobials            | AOM                             | 0.0 (0)     | 0.0       | 0.0 (0)     | 0.0        | 0.4 (1)      | 5.3        | 0.0 (0)     | 0.0  |
|                                        |                                 | Any                             | 12.8 (9)    | --        | 40.5 (17)   | --         | 5.4 (15)     | --         | 11.4 (19)   | --   |
|                                        |                                 | Any respiratory tract infection | 0.0 (0)     | 0.0       | 2.4 (1)     | 5.9        | 0.0 (0)      | 0.0        | 1.2 (2)     | 10.5 |
|                                        |                                 | LRTI                            | 0.0 (0)     | 0.0       | 2.4 (1)     | 5.9        | 0.0 (0)      | 0.0        | 1.2 (2)     | 10.5 |
|                                        | Penicillins                     | AOM                             | 0.0 (0)     | 0.0       | 0.0 (0)     | 0.0        | 0.0 (0)      | 0.0        | 0.0 (0)     | 0.0  |
|                                        |                                 | Any                             | 131.9 (507) | --        | 144 (281.0) | --         | 108.2 (1659) | --         | 111.7 (866) | --   |
|                                        |                                 | Any respiratory tract infection | 112.1 (431) | 85.0      | 118.4 (231) | 82.2       | 98.8 (1515)  | 91.3       | 100.5 (779) | 90.0 |
|                                        |                                 | LRTI                            | 90.5 (348)  | 68.6      | 98.9 (193)  | 68.7       | 79.3 (1216)  | 73.3       | 80.6 (625)  | 72.2 |
|                                        | Cephalosporins                  | AOM                             | 2.6 (10)    | 2.0       | 2.6 (5)     | 1.8        | 5.8 (89)     | 5.4        | 6.6 (51)    | 5.9  |
|                                        |                                 | Any                             | 18.2 (70)   | --        | 32.3 (63)   | --         | 7.6 (116)    | --         | 13.2 (102)  | --   |
|                                        |                                 | Any respiratory tract infection | 8.3 (32)    | 45.7      | 15.4 (30)   | 47.6       | 4.4 (67)     | 57.8       | 7.6 (59)    | 57.8 |
|                                        |                                 | LRTI                            | 6.0 (23)    | 32.9      | 13.8 (27)   | 42.9       | 3.5 (53)     | 45.7       | 6.7 (52)    | 51.0 |
|                                        | Macrolides                      | AOM                             | 0.5 (2)     | 2.9       | 0.0 (0)     | 0.0        | 0.4 (6)      | 5.2        | 0.3 (2)     | 2.0  |
|                                        |                                 | Any                             | 2.9 (11)    | --        | 4.1 (8)     | --         | 2.3 (35)     | --         | 2.2 (17)    | --   |
|                                        |                                 | Any respiratory tract infection | 2.3 (9)     | 81.8      | 3.1 (6)     | 75.0       | 2.0 (30)     | 85.7       | 1.9 (15)    | 88.2 |
|                                        |                                 | LRTI                            | 1.3 (5)     | 45.5      | 3.1 (6)     | 75.0       | 1.6 (24)     | 68.6       | 1.7 (13)    | 76.5 |
|                                        | Aminoglycosides                 | AOM                             | 0.0 (0)     | 0.0       | 0.0 (0)     | 0.0        | 0.0 (0)      | 0.0        | 0.0 (0)     | 0.0  |
|                                        |                                 | Any                             | 17.4 (67)   | --        | 30.2 (59)   | --         | 5.1 (78)     | --         | 9.3 (72)    | --   |
|                                        |                                 | Any respiratory tract infection | 9.9 (38)    | 56.7      | 20.5 (40)   | 67.8       | 2.9 (44)     | 56.4       | 6.6 (51)    | 70.8 |
|                                        |                                 | LRTI                            | 9.6 (37)    | 55.2      | 20.5 (40)   | 67.8       | 2.8 (43)     | 55.1       | 6.6 (51)    | 70.8 |
|                                        | Other antibiotics               | AOM                             | 0.0 (0)     | 0.0       | 0.0 (0)     | 0.0        | 0.0 (0)      | 0.0        | 0.0 (0)     | 0.0  |
|                                        |                                 | Any                             | 6.8 (26)    | --        | 8.7 (17)    | --         | 6.7 (103)    | --         | 7.9 (61)    | --   |
|                                        |                                 | Any respiratory tract infection | 2.1 (8)     | 30.8      | 3.1 (6)     | 35.3       | 2.3 (36)     | 35.0       | 3.0 (23)    | 37.7 |
|                                        |                                 | LRTI                            | 1.6 (6)     | 23.1      | 2.1 (4)     | 23.5       | 1.9 (29)     | 28.2       | 2.7 (21)    | 34.4 |
| Other antimicrobials                   | AOM                             | 0.3 (1)                         | 3.8         | 0.0 (0)   | 0.0         | 0.1 (2)    | 1.9          | 0.0 (0)    | 0.0         |      |
|                                        | Any                             | 3.4 (13)                        | --          | 5.1 (10)  | --          | 2.0 (31)   | --           | 1.9 (15)   | --          |      |
|                                        | Any respiratory tract infection | 0.3 (1)                         | 7.7         | 1.0 (2)   | 20.0        | 0.3 (4)    | 12.9         | 0.4 (3)    | 20.0        |      |
|                                        | LRTI                            | 0.3 (1)                         | 7.7         | 1.0 (2)   | 20.0        | 0.2 (3)    | 9.7          | 0.4 (3)    | 20.0        |      |
| Other low- and middle-income countries | AOM                             | 0.0 (0)                         | 0.0         | 0.0 (0)   | 0.0         | 0.0 (0)    | 0.0          | 0.0 (0)    | 0.0         |      |
|                                        | Any                             | 98.4 (102)                      | --          | 84.9 (44) | --          | 70.1 (295) | --           | 58.3 (124) | --          |      |
|                                        | Any respiratory tract infection |                                 |             |           |             |            |              |            |             |      |
|                                        | LRTI                            |                                 |             |           |             |            |              |            |             |      |

|                      |                                 |             |      |            |      |            |      |            |      |
|----------------------|---------------------------------|-------------|------|------------|------|------------|------|------------|------|
|                      | Any respiratory tract infection | 61.8 (64)   | 62.7 | 59.8 (31)  | 70.5 | 54.4 (229) | 77.6 | 45.2 (96)  | 77.4 |
|                      | LRTI                            | 48.3 (50)   | 49.0 | 54.0 (28)  | 63.6 | 38.7 (163) | 55.3 | 37.2 (79)  | 63.7 |
|                      | AOM                             | 1.1 (1)     | 1.0  | 0.0 (0)    | 0.0  | 1.4 (6)    | 2.0  | 0.9 (2)    | 1.6  |
| Cephalosporins       | Any                             | 113.9 (118) | --   | 104.1 (54) | --   | 60.1 (253) | --   | 61.1 (130) | --   |
|                      | Any respiratory tract infection | 57.9 (60)   | 50.8 | 54.0 (28)  | 51.9 | 36.8 (155) | 61.3 | 39.5 (84)  | 64.6 |
|                      | LRTI                            | 40.5 (42)   | 35.6 | 42.4 (22)  | 40.7 | 24.5 (103) | 40.7 | 30.1 (64)  | 49.2 |
|                      | AOM                             | 0.0 (0)     | 0.0  | 0.0 (0)    | 0.0  | 1.9 (8)    | 3.2  | 0.9 (2)    | 1.5  |
| Macrolides           | Any                             | 29.0 (30)   | --   | 44.4 (23)  | --   | 46.3 (195) | --   | 41.4 (88)  | --   |
|                      | Any respiratory tract infection | 23.2 (24)   | 80.0 | 40.5 (21)  | 91.3 | 38.7 (163) | 83.6 | 33.4 (71)  | 80.7 |
|                      | LRTI                            | 20.3 (21)   | 70.0 | 36.6 (19)  | 82.6 | 30.2 (127) | 65.1 | 24.0 (51)  | 58.0 |
|                      | AOM                             | 0.0 (0)     | 0.0  | 0.0 (0)    | 0.0  | 0.7 (3)    | 1.5  | 0.0 (0)    | 0.0  |
| Aminoglycosides      | Any                             | 56.9 (59)   | --   | 50.1 (26)  | --   | 15.4 (65)  | --   | 13.2 (28)  | --   |
|                      | Any respiratory tract infection | 18.3 (19)   | 32.2 | 17.4 (9)   | 34.6 | 5.7 (24)   | 36.9 | 4.7 (10)   | 35.7 |
|                      | LRTI                            | 12.5 (13)   | 22.0 | 13.5 (7)   | 26.9 | 3.6 (15)   | 23.1 | 3.3 (7)    | 25.0 |
|                      | AOM                             | 0.0 (0)     | 0.0  | 0.0 (0)    | 0.0  | 0.0 (0)    | 0.0  | 0.0 (0)    | 0.0  |
| Other antibiotics    | Any                             | 9.7 (10)    | --   | 21.2 (11)  | --   | 9.5 (40)   | --   | 11.3 (24)  | --   |
|                      | Any respiratory tract infection | 1.9 (2)     | 20.0 | 13.5 (7)   | 63.6 | 1.4 (6)    | 15.0 | 4.7 (10)   | 41.7 |
|                      | LRTI                            | 1.9 (2)     | 20.0 | 13.5 (7)   | 63.6 | 1.2 (5)    | 12.5 | 3.3 (7)    | 29.2 |
|                      | AOM                             | 0.0 (0)     | 0.0  | 0.0 (0)    | 0.0  | 0.0 (0)    | 0.0  | 0.0 (0)    | 0.0  |
| Other antimicrobials | Any                             | 3.9 (4)     | --   | 21.2 (11)  | --   | 2.6 (11)   | --   | 5.2 (11)   | --   |
|                      | Any respiratory tract infection | 1.0 (1)     | 25.0 | 13.5 (7)   | 63.6 | 0.7 (3)    | 27.3 | 3.3 (7)    | 63.6 |
|                      | LRTI                            | 1.0 (1)     | 25.0 | 13.5 (7)   | 63.6 | 0.7 (3)    | 27.3 | 3.3 (7)    | 63.6 |
|                      | AOM                             | 0.0 (0)     | 0.0  | 0.0 (0)    | 0.0  | 0.0 (0)    | 0.0  | 0.0 (0)    | 0.0  |

**Table S4: Vaccine efficacy against prescribing for various syndromes among infants in the US, South Africa, and other settings.**

| Setting                                | Endpoint                                                        | Through 90d from birth                                                     |             |                          |                                                   | Through end of follow-up                                                   |              |                          |                                                   |
|----------------------------------------|-----------------------------------------------------------------|----------------------------------------------------------------------------|-------------|--------------------------|---------------------------------------------------|----------------------------------------------------------------------------|--------------|--------------------------|---------------------------------------------------|
|                                        |                                                                 | RSV F Vaccine<br><i>no. of events per 100 person-years (no. of events)</i> | Placebo     | Effect measures (95% CI) |                                                   | RSV F Vaccine<br><i>no. of events per 100 person-years (no. of events)</i> | Placebo      | Effect measures (95% CI) |                                                   |
|                                        |                                                                 |                                                                            |             | <i>VE, %</i>             | <i>no. of events averted per 100 person-years</i> |                                                                            |              | <i>VE, %</i>             | <i>no. of events averted per 100 person-years</i> |
| United States                          |                                                                 |                                                                            |             |                          |                                                   |                                                                            |              |                          |                                                   |
|                                        | All antimicrobial prescriptions                                 | 50.0 (86)                                                                  | 55.8 (50)   | 10.4 (−33.1, 39.6)       | 5.8 (−18.5, 22.1)                                 | 62.5 (422)                                                                 | 66.7 (233)   | 6.3 (−17.4, 25.3)        | 4.2 (−11.6, 16.9)                                 |
|                                        | All antimicrobial prescriptions for respiratory tract infection | 22.7 (39)                                                                  | 30.1 (27)   | 24.8 (−27.3, 55.6)       | 7.5 (−8.2, 16.8)                                  | 49.3 (333)                                                                 | 53.8 (188)   | 8.2 (−18.4, 28.7)        | 4.4 (−9.9, 15.5)                                  |
|                                        | All antimicrobial prescriptions for LRTI                        | 7.0 (12)                                                                   | 19.0 (17)   | 63.4 (18.3, 83.6)        | 12.0 (3.5, 15.9)                                  | 7.7 (52)                                                                   | 10.0 (35)    | 22.9 (−32.2, 55.0)       | 2.3 (−3.2, 5.5)                                   |
|                                        | All antimicrobial prescriptions for AOM                         | 3.5 (6)                                                                    | 10.0 (9)    | 65.3 (2.6, 87.7)         | 6.6 (0.3, 8.8)                                    | 31.1 (210)                                                                 | 37.8 (132)   | 17.6 (−15.3, 41.2)       | 6.7 (−5.8, 15.6)                                  |
| Other high-income countries            |                                                                 |                                                                            |             |                          |                                                   |                                                                            |              |                          |                                                   |
|                                        | All antimicrobial prescriptions                                 | 69.9 (49)                                                                  | 107.3 (45)  | 34.3 (−14.4, 62.2)       | 36.7 (−15.4, 66.7)                                | 63.5 (177)                                                                 | 64.7 (108)   | 2.5 (−35.6, 29.9)        | 1.6 (−23.1, 19.3)                                 |
|                                        | All antimicrobial prescriptions for respiratory tract infection | 24.3 (17)                                                                  | 40.5 (17)   | 34.2 (−44.2, 70.0)       | 13.9 (−17.9, 28.4)                                | 40.5 (113)                                                                 | 39.5 (66)    | −5.9 (−58.7, 29.3)       | −2.3 (−23.2, 11.6)                                |
|                                        | All antimicrobial prescriptions for LRTI                        | 18.5 (13)                                                                  | 23.8 (10.0) | 13.7 (−161.5, 71.5)      | 3.3 (−38.5, 17.0)                                 | 16.9 (47)                                                                  | 18.0 (30)    | −4.6 (−95.8, 44.2)       | −0.8 (−17.2, 7.9)                                 |
|                                        | All antimicrobial prescriptions for AOM                         | 1.4 (1)                                                                    | 9.5 (4)     | 85.7 (−27.9, 98.4)       | 8.2 (−2.7, 9.4)                                   | 12.9 (36)                                                                  | 12.6 (21)    | 1.0 (−89.9, 48.4)        | 0.1 (−11.3, 6.1)                                  |
| South Africa                           |                                                                 |                                                                            |             |                          |                                                   |                                                                            |              |                          |                                                   |
|                                        | All antimicrobial prescriptions                                 | 151.9 (584)                                                                | 175.8 (343) | 13.5 (−1.5, 26.3)        | 23.8 (−2.6, 46.3)                                 | 121.7 (1866)                                                               | 129.1 (1001) | 5.4 (−5.3, 15.0)         | 7.0 (−6.8, 19.4)                                  |
|                                        | All antimicrobial prescriptions for respiratory tract infection | 122.5 (471)                                                                | 132.7 (259) | 7.7 (−10.3, 22.7)        | 10.2 (−13.7, 30.2)                                | 106.0 (1625)                                                               | 109.2 (847)  | 2.7 (−9.0, 13.2)         | 3.0 (−9.8, 14.4)                                  |
|                                        | All antimicrobial prescriptions for LRTI                        | 97.6 (375)                                                                 | 110.7 (216) | 11.9 (−7.0, 27.4)        | 13.1 (−7.8, 30.3)                                 | 85.0 (1304)                                                                | 88.1 (683)   | 3.1 (−9.7, 14.5)         | 2.8 (−8.6, 12.7)                                  |
|                                        | All antimicrobial prescriptions for AOM                         | 3.1 (12)                                                                   | 2.6 (5)     | −22.0 (−292.6, 62.1)     | −0.6 (−7.5, 1.6)                                  | 6.3 (96)                                                                   | 6.8 (53)     | 8.5 (−37.3, 38.9)        | 0.6 (−2.5, 2.7)                                   |
| Other low- and middle-income countries |                                                                 |                                                                            |             |                          |                                                   |                                                                            |              |                          |                                                   |
|                                        | All antimicrobial prescriptions                                 | 248.0 (257)                                                                | 241.1 (125) | 1.1 (−27.7, 23.4)        | 2.6 (−66.7, 56.3)                                 | 182.7 (769)                                                                | 166.5 (354)  | −7.4 (−28.0, 9.9)        | −12.3 (−46.5, 16.5)                               |
|                                        | All antimicrobial prescriptions for respiratory tract infection | 145.7 (151)                                                                | 152.4 (79)  | 8.8 (−26.7, 34.3)        | 13.3 (−40.6, 52.2)                                | 130.0 (547)                                                                | 117.6 (250)  | −8.5 (−33.1, 11.5)       | −10.0 (−38.9, 13.6)                               |
|                                        | All antimicrobial prescriptions for LRTI                        | 113.9 (118)                                                                | 131.1 (68)  | 16.6 (−22.0, 43.0)       | 21.8 (−28.8, 56.4)                                | 93.6 (394)                                                                 | 89.8 (191)   | −1.5 (−29.3, 20.3)       | −1.4 (−26.4, 18.2)                                |
|                                        | All antimicrobial prescriptions for AOM                         | 1.0 (1)                                                                    | 0.0 (0)     | —                        | —                                                 | 4.0 (17)                                                                   | 1.9 (4)      | −103.9 (−565.3, 37.5)    | −2.0 (−10.6, 0.7)                                 |



**Table S5: Incidence of antimicrobial prescribing among infants, by country and drug class.**

| Linked diagnosis | Setting        | Through 90d from birth                                |            |                                       | Through end of follow-up                              |             |                                       |                    |
|------------------|----------------|-------------------------------------------------------|------------|---------------------------------------|-------------------------------------------------------|-------------|---------------------------------------|--------------------|
|                  |                | RSV F Vaccine                                         | Placebo    | Averted incidence (95% CI)            | RSV F Vaccine                                         | Placebo     | Averted incidence (95% CI)            |                    |
|                  |                | <i>no. of events per 100 children (no. of events)</i> |            | <i>no. of events per 100 children</i> | <i>no. of events per 100 children (no. of events)</i> |             | <i>no. of events per 100 children</i> |                    |
| All antibiotics  | Argentina      | 20.7 (33)                                             | 25.1 (20)  | 4.3 (-18.4, 15.1)                     | 54.3 (86)                                             | 57.5 (47)   | 4.2 (-29.4, 24.8)                     |                    |
|                  | Australia      | 5.6 (4)                                               | 10.1 (4)   | 4.6 (-16.4, 9.0)                      | 26.3 (19)                                             | 25.0 (10)   | -0.7 (-40.5, 14.9)                    |                    |
|                  | Bangladesh     | 139.0 (111)                                           | 126.1 (46) | -13.0 (-76.0, 30.4)                   | 339.4 (279)                                           | 325.9 (122) | -14.7 (-129.4, 71.2)                  |                    |
|                  | Chile          | 16.0 (3)                                              | 35.5 (7)   | 19.8 (-61.7, 33.0)                    | 42.4 (8)                                              | 64.6 (13)   | 23.1 (-89.5, 53.4)                    |                    |
|                  | Spain          | 31.6 (8)                                              | 25.4 (3)   | -6.0 (-172.2, 20.4)                   | 75.8 (19)                                             | 59.5 (7)    | -16.7 (-169.0, 34.1)                  |                    |
|                  | Mexico         | 0.0 (0)                                               | 50.7 (2)   | --                                    | 14.6 (1)                                              | 49.7 (2)    | 45.7 (-541.2, 49.7)                   |                    |
|                  | New Zealand    | 17.4 (25)                                             | 22.1 (19)  | 4.5 (-19.2, 14.6)                     | 80.6 (114)                                            | 72.5 (61)   | -8.7 (-51.8, 19.4)                    |                    |
|                  | Philippines    | 64.8 (109)                                            | 58.5 (51)  | -6.2 (-36.7, 14.6)                    | 227.1 (394)                                           | 197.9 (177) | -35.3 (-99.6, 15.1)                   |                    |
|                  | United Kingdom | 19.3 (4)                                              | 18.4 (2)   | -1.4 (-89.8, 14.8)                    | 28.1 (6)                                              | 46.1 (5)    | 17.5 (-47.7, 37.4)                    |                    |
|                  | United States  | 8.7 (60)                                              | 12.3 (44)  | 3.6 (-1.3, 6.7)                       | 56.2 (379)                                            | 62.2 (217)  | 6.0 (-8.8, 17.7)                      |                    |
|                  | South Africa   | 37.3 (573)                                            | 43.1 (336) | 5.8 (-0.7, 11.3)                      | 120.0 (1840)                                          | 127.7 (990) | 7.3 (-6.4, 19.6)                      |                    |
|                  | Penicillins    | Argentina                                             | 6.3 (10)   | 5.0 (4)                               | -1.3 (-15.0, 3.0)                                     | 12.6 (20)   | 9.8 (8)                               | -2.7 (-18.5, 4.3)  |
|                  |                | Australia                                             | 4.2 (3)    | 10.1 (4)                              | 6.0 (-13.2, 9.4)                                      | 20.8 (15)   | 20.0 (8)                              | -0.7 (-36.3, 12.4) |
| Bangladesh       |                | 37.6 (30)                                             | 41.1 (15)  | 3.5 (-28.7, 20.9)                     | 76.6 (63)                                             | 77.5 (29)   | 0.6 (-44.8, 29.2)                     |                    |
| Chile            |                | 5.3 (1)                                               | 30.4 (6)   | 25.2 (-21.0, 29.9)                    | 26.5 (5)                                              | 49.7 (10)   | 24.0 (-58.6, 43.6)                    |                    |
| Spain            |                | 19.8 (5)                                              | 16.9 (2)   | -2.6 (-286.9, 15.7)                   | 47.9 (12)                                             | 51.0 (6)    | 3.0 (-163.5, 40.3)                    |                    |
| Mexico           |                | 0.0 (0)                                               | 0.0 (0)    | --                                    | 14.6 (1)                                              | 0.0 (0)     | --                                    |                    |
| New Zealand      |                | 12.5 (18)                                             | 18.6 (16)  | 6.0 (-10.2, 13.1)                     | 63.6 (90)                                             | 58.2 (49)   | -6.0 (43.1, 17.5)                     |                    |
| Philippines      |                | 36.8 (62)                                             | 28.7 (25)  | -8.1 (-30.7, 5.9)                     | 121.6 (211)                                           | 97.3 (87)   | -26.1 (-65.4, 3.7)                    |                    |
| United Kingdom   |                | 14.5 (3)                                              | 9.2 (1)    | -5.5 (-131.9, 7.7)                    | 14.0 (3)                                              | 36.9 (4)    | 22.7 (-26.6, 33.7)                    |                    |
| United States    |                | 4.9 (34)                                              | 8.7 (31)   | 3.7 (0.5, 5.7)                        | 35.3 (238)                                            | 42.7 (149)  | 7.5 (-2.1, 15.1)                      |                    |
| South Africa     |                | 33.0 (507)                                            | 36.0 (281) | 3.0 (-2.9, 8.0)                       | 108.2 (1659)                                          | 111.7 (866) | 3.2 (-9.4, 14.5)                      |                    |
| Cephalosporins   |                | Argentina                                             | 4.4 (7)    | 7.5 (6)                               | 3.1 (-10.4, 6.4)                                      | 11.4 (18)   | 20.8 (17)                             | 9.9 (-7.6, 16.6)   |
|                  |                | Australia                                             | 1.4 (1)    | 0.0 (0)                               | --                                                    | 4.2 (3)     | 2.5 (1)                               | -1.6 (-36.9, 2.1)  |
|                  | Bangladesh     | 92.7 (74)                                             | 79.5 (29)  | -13.3 (-78.0, 24.8)                   | 181.3 (149)                                           | 154.9 (58)  | -27.0 (-104.6, 27.4)                  |                    |
|                  | Chile          | 5.3 (1)                                               | 5.1 (1)    | -0.3 (-80.3, 4.7)                     | 10.6 (2)                                              | 5.0 (1)     | -5.7 (-112.5, 4.0)                    |                    |
|                  | Spain          | 7.9 (2)                                               | 8.5 (1)    | 0.6 (-271.2, 8.2)                     | 12.0 (3)                                              | 8.5 (1)     | -3.4 (-182.4, 7.7)                    |                    |
|                  | Mexico         | 0.0 (0)                                               | 0.0 (0)    | --                                    | 0.0 (0)                                               | 0.0 (0)     | --                                    |                    |
|                  | New Zealand    | 5.6 (8)                                               | 9.3 (8)    | 3.7 (-10.5, 7.7)                      | 13.4 (19)                                             | 17.8 (15)   | 4.1 (-13.2, 11.8)                     |                    |
|                  | Philippines    | 22.0 (37)                                             | 21.8 (19)  | -0.1 (-19.4, 10.2)                    | 49.6 (86)                                             | 61.5 (55)   | 11.3 (-14.3, 28.2)                    |                    |
|                  | United Kingdom | 4.8 (1)                                               | 9.2 (1)    | 4.4 (-68.0, 8.9)                      | 9.4 (2)                                               | 9.2 (1)     | -0.1 (-94.1, 8.4)                     |                    |
|                  | United States  | 2.2 (15)                                              | 2.5 (9)    | 0.3 (-3.1, 1.7)                       | 15.0 (101)                                            | 14.6 (51)   | -0.5 (-8.7, 4.8)                      |                    |
|                  | South Africa   | 4.6 (70)                                              | 8.1 (63)   | 3.5 (1.4, 5.0)                        | 7.6 (116)                                             | 13.2 (102)  | 5.6 (2.8, 7.6)                        |                    |
|                  | Macrolides     | Argentina                                             | 10.7 (17)  | 17.5 (14)                             | 6.9 (-8.8, 13.2)                                      | 30.3 (48)   | 31.8 (26)                             | 2.0 (-20.2, 14.8)  |
|                  |                | Australia                                             | 0.0 (0)    | 0.0 (0)                               | --                                                    | 1.4 (1)     | 0.0 (0)                               | --                 |
| Bangladesh       |                | 10.0 (8)                                              | 5.5 (2)    | -4.5 (-41.7, 3.4)                     | 68.1 (56)                                             | 80.1 (30)   | 11.7 (-29.9, 37.6)                    |                    |
| Chile            |                | 10.7 (2)                                              | 0.0 (0)    | --                                    | 10.6 (2)                                              | 5.0 (1)     | -5.5 (282.0, 4.6)                     |                    |
| Spain            |                | 4.0 (1)                                               | 0.0 (0)    | --                                    | 12.0 (3)                                              | 0.0 (0)     | --                                    |                    |
| Mexico           |                | 0.0 (0)                                               | 50.7 (2)   | --                                    | 0.0 (0)                                               | 49.7 (2)    | --                                    |                    |
| New Zealand      |                | 0.7 (1)                                               | 0.0 (0)    | --                                    | 3.5 (5)                                               | 1.2 (1)     | -2.3 (-35.0, 0.8)                     |                    |
| Philippines      |                | 3.0 (5)                                               | 5.7 (5)    | 2.8 (-4.5, 4.9)                       | 52.4 (91)                                             | 33.5 (30)   | -20.5 (-53.5, 0.0)                    |                    |
| United Kingdom   |                | 0.0 (0)                                               | 0.0 (0)    | --                                    | 4.7 (1)                                               | 0.0 (0)     | --                                    |                    |
| United States    |                | 1.6 (11)                                              | 1.4 (5)    | -0.2 (-3.2, 0.8)                      | 4.7 (32)                                              | 4.3 (15)    | -0.4 (-5.1, 1.9)                      |                    |
| South Africa     |                | 0.7 (11)                                              | 1.0 (8)    | 0.3 (-0.8, 0.7)                       | 2.3 (35)                                              | 2.2 (17)    | -0.1 (-2.0, 0.9)                      |                    |
| Aminoglycosides  |                | Argentina                                             | 4.4 (7)    | 2.5 (2)                               | -1.9 (-18.7, 1.6)                                     | 4.4 (7)     | 2.4 (2)                               | -1.9 (-18.3, 16.)  |

|                      |                |           |           |                    |           |           |                    |
|----------------------|----------------|-----------|-----------|--------------------|-----------|-----------|--------------------|
|                      | Australia      | 2.8 (2)   | 7.6 (3)   | 4.8 (-8.9, 7.1)    | 2.8 (2)   | 7.5 (3)   | 4.8 (-8.8, 7.0)    |
|                      | Bangladesh     | 16.3 (13) | 11.0 (4)  | -5.3 (-38.8, 5.7)  | 19.5 (16) | 13.4 (5)  | -6.1 (-41.9, 6.5)  |
|                      | Chile          | 0.0 (0)   | 0.0 (0.0) | --                 | 0.0 (0)   | 0.0 (0.0) | --                 |
|                      | Spain          | 11.9 (3)  | 8.5 (1)   | -3.3 (-104.1, 7.2) | 12.0 (3)  | 8.5 (1)   | -3.3 (-104.6, 7.3) |
|                      | Mexico         | 0.0 (0)   | 0.0 (0.0) | --                 | 0.0 (0)   | 0.0 (0.0) | --                 |
|                      | New Zealand    | 3.5 (5)   | 4.7 (4)   | 1.1 (-12.3, 3.9)   | 3.5 (5)   | 4.8 (4)   | 1.1 (-12.6, 4.0)   |
|                      | Philippines    | 23.2 (39) | 22.9 (20) | -0.1 (-16.5, 9.5)  | 24.2 (42) | 23.5 (21) | -0.7 (-17.4, 9.2)  |
|                      | United Kingdom | 9.7 (2)   | 9.2 (1)   | -0.6 (-99.1, 8.3)  | 9.4 (2)   | 9.2 (1)   | -0.6 (-99.1, 8.3)  |
|                      | United States  | 2.8 (19)  | 3.3 (12)  | 0.6 (-2.5, 2.0)    | 3.0 (20)  | 3.7 (13)  | 0.7 (-2.4, 2.3)    |
|                      | South Africa   | 4.4 (67)  | 7.6 (59)  | 3.2 (1.3, 4.6)     | 5.1 (78)  | 9.3 (72)  | 4.2 (2.1, 5.7)     |
| Other antibiotics    |                |           |           |                    |           |           |                    |
|                      | Argentina      | 4.4 (7)   | 10.0 (8)  | 5.6 (-6.3, 8.8)    | 8.8 (14)  | 11.0 (9)  | 2.6 (-11.9, 7.9)   |
|                      | Australia      | 4.2 (3)   | 10.1 (4)  | 6.0 (-11.8, 9.4)   | 6.9 (5)   | 12.5 (5)  | 5.6 (-17.5, 10.9)  |
|                      | Bangladesh     | 0.0 (0)   | 8.2 (3)   | --                 | 20.7 (17) | 29.4 (11) | 8.7 (-27.6, 21.9)  |
|                      | Chile          | 0.0 (0)   | 10.1 (2)  | --                 | 0.0 (0)   | 19.9 (4)  | --                 |
|                      | Spain          | 0.0 (0)   | 16.9 (2)  | --                 | 16.0 (4)  | 17.0 (2)  | 0.8 (-88.8, 14.5)  |
|                      | Mexico         | 0.0 (0)   | 19.9 (4)  | --                 | 0.0 (0)   | 0.0 (0.0) | --                 |
|                      | New Zealand    | 4.9 (7)   | 9.3 (8)   | 4.4 (-5.9, 7.7)    | 7.1 (10)  | 11.9 (10) | 4.6 (-6.3, 9.0)    |
|                      | Philippines    | 1.8 (3)   | 0.0 (0)   | --                 | 5.2 (9)   | 4.5 (4)   | -0.9 (-16.8, 3.1)  |
|                      | United Kingdom | 0.0 (0)   | 9.2 (1)   | --                 | 0.0 (0)   | 9.2 (1)   | --                 |
|                      | United States  | 4.2 (29)  | 3.3 (12)  | -0.9 (-5.5, 1.3)   | 10.4 (70) | 8.3 (29)  | -2.0 (-9.1, 2.2)   |
|                      | South Africa   | 1.7 (26)  | 2.2 (17)  | 0.5 (-1.0, 1.3)    | 6.7 (103) | 7.9 (61)  | 1.2 (-2.0, 3.3)    |
| Other antimicrobials |                |           |           |                    |           |           |                    |
|                      | Argentina      | 1.9 (3)   | 10.0 (8)  | 8.1 (1.2, 9.6)     | 5.7 (9)   | 9.8 (8)   | 4.4 (-6.9, 8.1)    |
|                      | Australia      | 4.2 (3)   | 10.1 (4)  | 6.0 (-11.8, 9.4)   | 6.9 (5)   | 10.0 (4)  | 3.1 (-18.5, 8.3)   |
|                      | Bangladesh     | 0.0 (0)   | 8.2 (3)   | --                 | 0.0 (0)   | 8.0 (3)   | --                 |
|                      | Chile          | 0.0 (0)   | 10.1 (2)  | --                 | 0.0 (0)   | 14.9 (3)  | --                 |
|                      | Spain          | 0.0 (0)   | 16.9 (2)  | --                 | 12.0 (3)  | 17.0 (2)  | 4.9 (-82.3, 15.5)  |
|                      | Mexico         | 0.0 (0)   | 0.0 (0)   | --                 | 0.0 (0)   | 0.0 (0)   | --                 |
|                      | New Zealand    | 4.2 (6)   | 9.3 (8)   | 5.1 (-4.4, 8.0)    | 4.9 (7)   | 10.7 (9)  | 5.5 (-4.0, 8.9)    |
|                      | Philippines    | 0.6 (1)   | 0.0 (0)   | --                 | 1.2 (2)   | 0.0 (0)   | --                 |
|                      | United Kingdom | 0.0 (0)   | 9.2 (1)   | --                 | 0.0 (0)   | 9.2 (1)   | --                 |
|                      | United States  | 3.9 (27)  | 2.0 (7)   | -2.0 (-7.7, 0.3)   | 7.4 (50)  | 5.7 (20)  | -1.7 (-7.5, 1.6)   |
|                      | South Africa   | 0.8 (13)  | 1.3 (10)  | 0.4 (-0.8, 0.9)    | 2.0 (31)  | 1.9 (15)  | -0.1 (-2.0, 0.9)   |

**Table S6: Vaccine efficacy against antimicrobial prescribing for various drug classes among infants in the US, South Africa, and other settings.**

| Setting                                | Endpoint             | Through 90d from birth                                              |                                                               |                          |                                            | Through end of follow-up                                            |                                                               |                          |                                            |
|----------------------------------------|----------------------|---------------------------------------------------------------------|---------------------------------------------------------------|--------------------------|--------------------------------------------|---------------------------------------------------------------------|---------------------------------------------------------------|--------------------------|--------------------------------------------|
|                                        |                      | RSV F Vaccine<br>no. of events per 100 person-years (no. of events) | Placebo<br>no. of events per 100 person-years (no. of events) | Effect measures (95% CI) |                                            | RSV F Vaccine<br>no. of events per 100 person-years (no. of events) | Placebo<br>no. of events per 100 person-years (no. of events) | Effect measures (95% CI) |                                            |
|                                        |                      |                                                                     |                                                               | VE, %                    | no. of events averted per 100 person-years |                                                                     |                                                               | VE, %                    | no. of events averted per 100 person-years |
| United States                          |                      |                                                                     |                                                               |                          |                                            |                                                                     |                                                               |                          |                                            |
|                                        | All antibiotics      | 34.9 (60)                                                           | 49.1 (44)                                                     | 29.0 (-10.7, 54.5)       | 14.3 (-5.3, 26.8)                          | 56.2 (379)                                                          | 62.2 (217)                                                    | 9.7 (-14.1, 28.5)        | 6.0 (-8.8, 17.7)                           |
|                                        | Penicillins          | 19.8 (34)                                                           | 34.6 (31)                                                     | 42.9 (5.4, 65.5)         | 14.8 (1.9, 22.7)                           | 35.3 (238)                                                          | 42.7 (149)                                                    | 17.6 (-4.8, 35.3)        | 7.5 (-2.1, 15.1)                           |
|                                        | Cephalosporins       | 8.7 (15)                                                            | 10.0 (9)                                                      | 13.2 (-121.6, 66.0)      | 1.3 (-12.2, 6.6)                           | 15.0 (101)                                                          | 14.6 (51)                                                     | -3.6 (-59.5, 32.7)       | -0.5 (-8.7, 4.8)                           |
|                                        | Macrolides           | 6.4 (11)                                                            | 5.6 (5)                                                       | -14.5 (-229.6, 60.2)     | -0.8 (-12.8, 3.4)                          | 4.7 (32)                                                            | 4.3 (15)                                                      | -10.0 (-117.8, 44.5)     | -0.4 (-5.1, 1.9)                           |
|                                        | Aminoglycosides      | 11.0 (19)                                                           | 13.4 (12)                                                     | 17.3 (-74.3, 60.8)       | 2.3 (-10.0, 8.1)                           | 3.0 (20)                                                            | 3.7 (13)                                                      | 19.7 (-64.4, 60.8)       | 0.7 (-2.4, 2.3)                            |
|                                        | Other antibiotics    | 16.9 (29)                                                           | 13.4 (12)                                                     | -25.9 (-165.1, 40.2)     | -3.5 (-22.1, 5.4)                          | 10.4 (70)                                                           | 8.3 (29)                                                      | -24.2 (-109.4, 26.3)     | -2.0 (-9.1, 2.2)                           |
|                                        | Other antimicrobials | 15.7 (27)                                                           | 7.8 (7)                                                       | -101.1 (-392.3, 17.9)    | -7.9 (-30.7, 1.4)                          | 7.4 (50)                                                            | 5.7 (20)                                                      | -29.0 (-131.2, 28.0)     | -1.7 (-7.5, 1.6)                           |
| Other high-income countries            |                      |                                                                     |                                                               |                          |                                            |                                                                     |                                                               |                          |                                            |
|                                        | All antibiotics      | 62.8 (44)                                                           | 83.4 (35)                                                     | 24.2 (-39.0, 58.7)       | 20.2 (-32.5, 48.9)                         | 59.5 (166)                                                          | 57.5 (96)                                                     | -3.2 (-44.6, 26.4)       | -1.8 (-25.7, 15.2)                         |
|                                        | Penicillins          | 42.8 (30)                                                           | 69.1 (29)                                                     | 38.2 (-18.0, 67.6)       | 26.4 (-12.4, 46.7)                         | 44.8 (125)                                                          | 46.1 (77)                                                     | 3.7 (-39.8, 33.6)        | 1.7 (-18.4, 15.5)                          |
|                                        | Cephalosporins       | 18.5 (11)                                                           | 26.2 (11)                                                     | 26.6 (-98.2, 72.8)       | 7.0 (-25.7, 19.1)                          | 10.4 (29)                                                           | 11.4 (19)                                                     | 6.2 (-83.3, 52.0)        | 0.7 (-9.5, 5.9)                            |
|                                        | Macrolides           | 5.7 (4)                                                             | 0.0 (0)                                                       | --                       | --                                         | 4.3 (12)                                                            | 1.2 (2)                                                       | -303.9 (-2099.3, 25.8)   | -3.6 (-25.2, 0.3)                          |
|                                        | Aminoglycosides      | 17.1 (12)                                                           | 21.5 (9)                                                      | 27.5 (-78.1, 70.5)       | 5.9 (-16.8, 15.1)                          | 4.3 (12)                                                            | 5.4 (9)                                                       | 27.5 (-78.1, 70.5)       | 1.5 (-4.2, 3.8)                            |
|                                        | Other antibiotics    | 14.3 (10)                                                           | 40.5 (17)                                                     | 65.9 (18.3, 85.7)        | 26.7 (7.4, 34.7)                           | 6.8 (19)                                                            | 13.2 (22)                                                     | 48.6 (-1.5, 73.9)        | 6.4 (-0.2, 9.7)                            |
|                                        | Other antimicrobials | 12.8 (9)                                                            | 40.5 (17)                                                     | 69.2 (24.3, 87.5)        | 28.0 (9.8, 35.4)                           | 5.4 (15)                                                            | 11.4 (19)                                                     | 53.6 (1.4, 78.2)         | 6.1 (0.2, 8.9)                             |
| South Africa                           |                      |                                                                     |                                                               |                          |                                            |                                                                     |                                                               |                          |                                            |
|                                        | All antibiotics      | 149.1 (573)                                                         | 172.2 (336)                                                   | 13.4 (-1.7, 26.3)        | 23.1 (-3.0, 45.2)                          | 120.0 (1840)                                                        | 127.7 (990)                                                   | 5.7 (-5.0, 15.3)         | 7.3 (-6.4, 19.6)                           |
|                                        | Penicillins          | 131.9 (507)                                                         | 144.0 (281)                                                   | 8.4 (-8.0, 22.3)         | 12.1 (-11.5, 32.0)                         | 108.2 (1659)                                                        | 111.7 (866)                                                   | 2.8 (-8.4, 12.9)         | 3.2 (-9.4, 14.5)                           |
|                                        | Cephalosporins       | 18.2 (70)                                                           | 32.3 (63)                                                     | 43.5 (16.8, 61.7)        | 14.1 (5.4, 19.9)                           | 7.6 (116)                                                           | 13.2 (102)                                                    | 42.3 (21.3, 57.7)        | 5.6 (2.8, 7.6)                             |
|                                        | Macrolides           | 2.9 (11)                                                            | 4.1 (8)                                                       | 30.2 (-73.5, 71.9)       | 1.2 (-3.0, 2.9)                            | 2.3 (35)                                                            | 2.2 (17)                                                      | -4.4 (-89.5, 42.4)       | -0.1 (-2.0, 0.9)                           |
|                                        | Aminoglycosides      | 17.4 (67)                                                           | 30.2 (59)                                                     | 42.5 (16.7, 60.3)        | 12.9 (5.1, 18.2)                           | 5.1 (78)                                                            | 9.3 (72)                                                      | 45.1 (22.9, 60.9)        | 4.2 (2.1, 5.7)                             |
|                                        | Other antibiotics    | 6.8 (26)                                                            | 8.7 (17)                                                      | 22.4 (-46.7, 58.9)       | 2.0 (-4.1, 5.1)                            | 6.7 (103)                                                           | 7.9 (61)                                                      | 14.8 (-25.0, 41.9)       | 1.2 (-2.0, 3.3)                            |
|                                        | Other antimicrobials | 3.4 (13)                                                            | 5.1 (10)                                                      | 34.1 (-62.5, 73.3)       | 1.7 (-3.2, 3.8)                            | 2.0 (31)                                                            | 1.9 (15)                                                      | -4.3 (-103.5, 46.5)      | -0.1 (-2.0, 0.9)                           |
| Other low- and middle-income countries |                      |                                                                     |                                                               |                          |                                            |                                                                     |                                                               |                          |                                            |
|                                        | All antibiotics      | 244.2 (253)                                                         | 229.5 (119)                                                   | -2.5 (-32.4, 20.6)       | -5.8 (-74.4, 47.3)                         | 180.6 (760)                                                         | 163.7 (348)                                                   | -7.9 (-28.8, 9.6)        | -13.0 (-47.1, 15.6)                        |
|                                        | Penicillins          | 98.4 (102)                                                          | 84.9 (44)                                                     | -15.1 (-64.1, 19.2)      | -12.9 (-54.4, 16.3)                        | 70.1 (295)                                                          | 58.3 (124)                                                    | -20.4 (-51.2, 4.1)       | -11.9 (-29.9, 2.4)                         |
|                                        | Cephalosporins       | 113.9 (118)                                                         | 104.1 (54)                                                    | -1.3 (-49.8, 31.5)       | -1.3 (-51.8, 32.8)                         | 60.1 (253)                                                          | 61.1 (130)                                                    | 11.1 (-15.8, 31.8)       | 6.8 (-9.7, 19.4)                           |
|                                        | Macrolides           | 29.0 (30)                                                           | 44.4 (23)                                                     | 34.4 (-23.5, 71.9)       | 15.3 (-10.4, 28.9)                         | 46.3 (195)                                                          | 41.4 (88)                                                     | -11.3 (-48.7, 16.7)      | -4.7 (-20.2, 6.9)                          |
|                                        | Aminoglycosides      | 56.9 (59)                                                           | 50.1 (26)                                                     | -13.7 (-80.3, 28.4)      | -6.8 (-40.3, 14.2)                         | 15.4 (65)                                                           | 13.2 (28)                                                     | -16.1 (-80.8, 25.5)      | -2.1 (-10.6, 3.4)                          |
|                                        | Other antibiotics    | 9.7 (10)                                                            | 21.2 (11)                                                     | 52.2 (-40.6, 83)         | 11.1 (-8.6, 17.8)                          | 9.5 (40)                                                            | 11.3 (24)                                                     | 16.8 (-55.5, 55.5)       | 1.9 (-6.3, 6.3)                            |
|                                        | Other antimicrobials | 3.9 (4)                                                             | 21.2 (11)                                                     | 81.1 (29.5, 95.0)        | 17.2 (6.2, 20.1)                           | 2.6 (11)                                                            | 5.2 (11)                                                      | 51.3 (-31.6, 82.0)       | 2.7 (-1.6, 4.2)                            |

**Table S7: Vaccine efficacy against antimicrobial prescription among maternal participants within the intention-to-treat population.**

| Setting                          | Endpoint                                 | Through end of follow-up                                   |                                   | VE (95% CI)<br>%     |
|----------------------------------|------------------------------------------|------------------------------------------------------------|-----------------------------------|----------------------|
|                                  |                                          | RSV F Vaccine<br><i>no. of events per 100 person-years</i> | Placebo<br><i>(no. of events)</i> |                      |
| All countries                    |                                          | <i>1920 person-years</i>                                   | <i>994 person-years</i>           |                      |
|                                  | All antimicrobial prescriptions          | 120.9 (2321)                                               | 122.6 (1218)                      | 0.9 (-7.7, 8.8)      |
|                                  | All antimicrobial prescriptions for LRTI | 22.6 (433)                                                 | 23.4 (233)                        | 2.7 (-18.1, 19.8)    |
| High-income countries            |                                          | <i>616 person-years</i>                                    | <i>330 person-years</i>           |                      |
|                                  | All antimicrobial prescriptions          | 101.3 (624)                                                | 95.3 (314)                        | -7.3 (-25.8, 8.5)    |
|                                  | All antimicrobial prescriptions for LRTI | 5.0 (31)                                                   | 3.9 (13)                          | -31.4 (-164.4, 34.7) |
| Low- and middle-income countries |                                          | <i>1304 person-years</i>                                   | <i>664 person-years</i>           |                      |
|                                  | All antimicrobial prescriptions          | 130.2 (1697)                                               | 136.1 (904)                       | 4.0 (-5.8, 12.8)     |
|                                  | All antimicrobial prescriptions for LRTI | 30.8 (402)                                                 | 33.1 (220)                        | 5.3 (-15.8, 22.6)    |

**Table S8: Vaccine efficacy against antimicrobial prescription, by drug class, among maternal participants within the intention-to-treat population.**

| Endpoint                                 | Drug                                                              | Through end of follow-up                                                               |                                                            | VE (95% CI)<br>%     |
|------------------------------------------|-------------------------------------------------------------------|----------------------------------------------------------------------------------------|------------------------------------------------------------|----------------------|
|                                          |                                                                   | RSV F Vaccine<br><i>no. of events per 100 person-years</i><br><i>1920 person-years</i> | Placebo<br><i>no. of events</i><br><i>994 person-years</i> |                      |
| All antimicrobial prescriptions          | Any antibiotic                                                    | 117.6 (2258)                                                                           | 120.1 (1193)                                               | 1.5 (-7.1, 9.4)      |
|                                          | Penicillins                                                       | 87.6 (1681)                                                                            | 88.3 (877)                                                 | 0.2 (-9.8, 9.4)      |
|                                          | Cephalosporins                                                    | 19.3 (371)                                                                             | 19.8 (197)                                                 | -0.3 (-20.3, 16.4)   |
|                                          | Macrolides                                                        | 8.3 (160)                                                                              | 7.0 (70)                                                   | -24.9 (-68.5, 7.5)   |
|                                          | Aminoglycosides                                                   | 2.4 (47)                                                                               | 2.6 (26)                                                   | 2.6 (-63.9, 42.1)    |
|                                          | Other antibiotics                                                 | 17.2 (330)                                                                             | 16.2 (161)                                                 | -6.9 (-31.7, 13.1)   |
|                                          | Antivirals, antifungals, antiprotozoans, and other antimicrobials | 3.5 (67)                                                                               | 3.0 (30)                                                   | -13.3 (-88.2, 31.8)  |
|                                          | Antivirals                                                        | 2.3 (44)                                                                               | 1.4 (14)                                                   | -64.4 (-223.3, 16.4) |
|                                          | Antifungals                                                       | 1.2 (23)                                                                               | 1.3 (13)                                                   | 19.1 (-89.7, 65.5)   |
| All antimicrobial prescriptions for LRTI | Any antibiotic                                                    | 22.5 (432)                                                                             | 23.3 (232)                                                 | 2.3 (-18.6, 19.4)    |
|                                          | Penicillins                                                       | 19.8 (381)                                                                             | 19.8 (197)                                                 | 0.1 (-22.7, 18.7)    |
|                                          | Cephalosporins                                                    | 1.0 (19)                                                                               | 1.6 (16)                                                   | 32.4 (-37.7, 66.8)   |
|                                          | Macrolides                                                        | 1.6 (31)                                                                               | 2.0 (20)                                                   | 13.4 (-53.9, 51.3)   |
|                                          | Aminoglycosides                                                   | --                                                                                     | --                                                         | --                   |
|                                          | Other antibiotics                                                 | 1.3 (24)                                                                               | 1.1 (11)                                                   | -9.1 (-131.2, 48.5)  |
|                                          | Antivirals, antifungals, antiprotozoans, and other antimicrobials | 0.1 (2)                                                                                | 0.1 (1)                                                    | -3.8 (-1044.4, 90.6) |
|                                          | Antivirals                                                        | --                                                                                     | 0.1 (1)                                                    | --                   |
|                                          | Antifungals                                                       | 0.1 (1)                                                                                | --                                                         | --                   |

**Table S9: Dates of enrollment in each trial location.**

| <b>Season</b> | <b>Country</b> | <b>Period of vaccine or placebo administration</b> |
|---------------|----------------|----------------------------------------------------|
| 1             | Australia      | 13 April 2016 to 10 May 2016                       |
|               | Chile          | 25 April 2016 to 12 May 2016                       |
|               | New Zealand    | 17 February 2016 to 9 May 2016                     |
|               | South Africa   | 22 December 2015 to 7 March 2016                   |
|               | United States  | 30 November 2015 to 16 December 2015               |
| 2             | Argentina      | 23 January 2017 to 6 February 2017                 |
|               | Australia      | 20 February 2017 to 13 June 2017                   |
|               | Chile          | 12 January 2017 to 4 May 2017                      |
|               | New Zealand    | 24 January 2017 to 7 June 2017                     |
|               | South Africa   | 6 October 2016 to 29 March 2017                    |
|               | Spain          | 7 November 2016 only                               |
|               | United States  | 24 August 2016 to 3 January 2017                   |
| 3             | Argentina      | 21 December 2017 to 8 May 2018                     |
|               | Australia      | 14 November 2017 to 11 May 2018                    |
|               | Mexico         | 26 June 2017 to 23 October 2017                    |
|               | New Zealand    | 8 January 2018 to 22 May 2018                      |
|               | Philippines    | 30 June 2017 to 6 September 2017                   |
|               | South Africa   | 27 September 2017 to 8 May 2018                    |
|               | Spain          | 5 July 2017 to 1 December 2017                     |
|               | United Kingdom | 30 June 2017 to 19 October 2017                    |
|               | United States  | 3 May 2017 to 29 December 2017                     |
| 4             | Bangladesh     | 29 January 2018 to 3 April 2018                    |
|               | Philippines    | 20 March 2018 to 4 May 2018                        |

**Table S10: Antimicrobial prescriptions among infants.**

| Country   | Drug Class  | Subclass                      | Name                              | Follow-up observations                                                                               |                                                                   |                                                                                                        |                                                                   |
|-----------|-------------|-------------------------------|-----------------------------------|------------------------------------------------------------------------------------------------------|-------------------------------------------------------------------|--------------------------------------------------------------------------------------------------------|-------------------------------------------------------------------|
|           |             |                               |                                   | Through 90d from birth<br>RSV F<br>vaccine<br>no. of events per 100 person-<br>years (no. of events) | Placebo<br>no. of events per 100 person-<br>years (no. of events) | Through end of follow-up<br>RSV F<br>vaccine<br>no. of events per 100 person-<br>years (no. of events) | Placebo<br>no. of events per 100 person-<br>years (no. of events) |
| Argentina |             |                               |                                   | 39.8 person-<br>years                                                                                | 20.0 person-<br>years                                             | 158.3 person-<br>years                                                                                 | 81.7 person-<br>years                                             |
|           | Antibiotics |                               |                                   |                                                                                                      |                                                                   |                                                                                                        |                                                                   |
|           |             | Penicillins                   |                                   |                                                                                                      |                                                                   |                                                                                                        |                                                                   |
|           |             |                               | Amoxicillin                       | 5.0 (2)                                                                                              | 5.0 (1)                                                           | 6.9 (11)                                                                                               | 6.1 (5)                                                           |
|           |             |                               | Ampicillin                        | 20.1 (8)                                                                                             | 15.0 (3)                                                          | 5.1 (8)                                                                                                | 3.7 (3)                                                           |
|           |             |                               | Cloxacillin                       | 0.0 (0)                                                                                              | 0.0 (0)                                                           | 0.0 (0)                                                                                                | 0.0 (0)                                                           |
|           |             |                               | Dicloxacillin                     | 0.0 (0)                                                                                              | 0.0 (0)                                                           | 0.0 (0)                                                                                                | 0.0 (0)                                                           |
|           |             |                               | Floxacillin                       | 0.0 (0)                                                                                              | 0.0 (0)                                                           | 0.0 (0)                                                                                                | 0.0 (0)                                                           |
|           |             |                               | Oxacillin                         | 0.0 (0)                                                                                              | 0.0 (0)                                                           | 0.0 (0)                                                                                                | 0.0 (0)                                                           |
|           |             |                               | Penicillin                        | 0.0 (0)                                                                                              | 0.0 (0)                                                           | 0.6 (1)                                                                                                | 0.0 (0)                                                           |
|           |             |                               | Piperacillin                      | 0.0 (0)                                                                                              | 0.0 (0)                                                           | 0.0 (0)                                                                                                | 0.0 (0)                                                           |
|           |             | Cephalosporins (I)            |                                   |                                                                                                      |                                                                   |                                                                                                        |                                                                   |
|           |             |                               | Cefadroxil                        | 0.0 (0)                                                                                              | 0.0 (0)                                                           | 0.0 (0)                                                                                                | 0.0 (0)                                                           |
|           |             |                               | Cefalexin                         | 0.0 (0)                                                                                              | 0.0 (0)                                                           | 0.0 (0)                                                                                                | 2.4 (2)                                                           |
|           |             |                               | Cefalotin                         | 0.0 (0)                                                                                              | 0.0 (0)                                                           | 0.6 (1)                                                                                                | 2.4 (2)                                                           |
|           |             |                               | Cefazolin                         | 0.0 (0)                                                                                              | 0.0 (0)                                                           | 0.0 (0)                                                                                                | 0.0 (0)                                                           |
|           |             |                               | Cefradine                         | 0.0 (0)                                                                                              | 0.0 (0)                                                           | 0.0 (0)                                                                                                | 0.0 (0)                                                           |
|           |             | Cephalosporins (II)           |                                   |                                                                                                      |                                                                   |                                                                                                        |                                                                   |
|           |             |                               | Cefaclor                          | 0.0 (0)                                                                                              | 0.0 (0)                                                           | 0.0 (0)                                                                                                | 0.0 (0)                                                           |
|           |             |                               | Cefoxitin                         | 0.0 (0)                                                                                              | 0.0 (0)                                                           | 0.0 (0)                                                                                                | 0.0 (0)                                                           |
|           |             |                               | Cefprozil                         | 0.0 (0)                                                                                              | 0.0 (0)                                                           | 0.0 (0)                                                                                                | 0.0 (0)                                                           |
|           |             |                               | Cefuroxime axetil                 | 0.0 (0)                                                                                              | 0.0 (0)                                                           | 0.0 (0)                                                                                                | 0.0 (0)                                                           |
|           |             | Cephalosporins (III<br>or IV) |                                   |                                                                                                      |                                                                   |                                                                                                        |                                                                   |
|           |             |                               | Cefdinir                          | 0.0 (0)                                                                                              | 0.0 (0)                                                           | 0.0 (0)                                                                                                | 0.0 (0)                                                           |
|           |             |                               | Cefditoren                        | 0.0 (0)                                                                                              | 0.0 (0)                                                           | 0.0 (0)                                                                                                | 0.0 (0)                                                           |
|           |             |                               | Cefepime                          | 0.0 (0)                                                                                              | 0.0 (0)                                                           | 0.0 (0)                                                                                                | 0.0 (0)                                                           |
|           |             |                               | Cefixime                          | 2.5 (1)                                                                                              | 0.0 (0)                                                           | 0.6 (1)                                                                                                | 1.2 (1)                                                           |
|           |             |                               | Cefotaxime                        | 0.0 (0)                                                                                              | 5.0 (1)                                                           | 0.0 (0)                                                                                                | 1.2 (1)                                                           |
|           |             |                               | Cefpodoxime                       | 0.0 (0)                                                                                              | 0.0 (0)                                                           | 0.0 (0)                                                                                                | 0.0 (0)                                                           |
|           |             |                               | Ceftazidime                       | 2.5 (1)                                                                                              | 0.0 (0)                                                           | 0.6 (1)                                                                                                | 0.0 (0)                                                           |
|           |             |                               | Ceftibuten                        | 0.0 (0)                                                                                              | 0.0 (0)                                                           | 0.0 (0)                                                                                                | 0.0 (0)                                                           |
|           |             |                               | Ceftriaxone                       | 12.5 (5)                                                                                             | 25.1 (5)                                                          | 9.5 (15)                                                                                               | 13.5 (11)                                                         |
|           |             | Macrolides                    |                                   |                                                                                                      |                                                                   |                                                                                                        |                                                                   |
|           |             |                               | Azithromycin                      | 10.0 (4)                                                                                             | 10.0 (2)                                                          | 10.1 (16)                                                                                              | 7.3 (6)                                                           |
|           |             |                               | Clarithromycin                    | 30.1 (12)                                                                                            | 70.1 (14)                                                         | 19.6 (31)                                                                                              | 26.9 (22)                                                         |
|           |             |                               | Erythromycin                      | 2.5 (1)                                                                                              | 0.0 (0)                                                           | 0.6 (1)                                                                                                | 0.0 (0)                                                           |
|           |             |                               | Roxithromycin                     | 0.0 (0)                                                                                              | 0.0 (0)                                                           | 0.0 (0)                                                                                                | 0.0 (0)                                                           |
|           |             | Aminoglycosides               |                                   |                                                                                                      |                                                                   |                                                                                                        |                                                                   |
|           |             |                               | Amikacin                          | 0.0 (0)                                                                                              | 0.0 (0)                                                           | 0.0 (0)                                                                                                | 0.0 (0)                                                           |
|           |             |                               | Gentamicin                        | 17.6 (7)                                                                                             | 10.0 (2)                                                          | 4.4 (7)                                                                                                | 2.4 (2)                                                           |
|           |             |                               | Tobramycin                        | 0.0 (0)                                                                                              | 0.0 (0)                                                           | 0.0 (0)                                                                                                | 0.0 (0)                                                           |
|           |             | Other antibiotics             |                                   |                                                                                                      |                                                                   |                                                                                                        |                                                                   |
|           |             |                               | Bacitracin                        | 0.0 (0)                                                                                              | 0.0 (0)                                                           | 0.0 (0)                                                                                                | 0.0 (0)                                                           |
|           |             |                               | Benzalkonium chloride             | 0.0 (0)                                                                                              | 0.0 (0)                                                           | 0.0 (0)                                                                                                | 0.0 (0)                                                           |
|           |             |                               | Chloramphenicol                   | 0.0 (0)                                                                                              | 0.0 (0)                                                           | 0.0 (0)                                                                                                | 0.0 (0)                                                           |
|           |             |                               | Ciprofloxacin                     | 0.0 (0)                                                                                              | 0.0 (0)                                                           | 0.0 (0)                                                                                                | 0.0 (0)                                                           |
|           |             |                               | Clindamycin                       | 2.5 (1)                                                                                              | 0.0 (0)                                                           | 0.6 (1)                                                                                                | 0.0 (0)                                                           |
|           |             |                               | Doxycycline                       | 0.0 (0)                                                                                              | 0.0 (0)                                                           | 0.0 (0)                                                                                                | 0.0 (0)                                                           |
|           |             |                               | Ertapenem                         | 0.0 (0)                                                                                              | 0.0 (0)                                                           | 0.0 (0)                                                                                                | 0.0 (0)                                                           |
|           |             |                               | Ethambutol                        | 0.0 (0)                                                                                              | 0.0 (0)                                                           | 0.0 (0)                                                                                                | 0.0 (0)                                                           |
|           |             |                               | Fosfomycin                        | 0.0 (0)                                                                                              | 0.0 (0)                                                           | 0.0 (0)                                                                                                | 0.0 (0)                                                           |
|           |             |                               | Hexamine                          | 0.0 (0)                                                                                              | 0.0 (0)                                                           | 0.0 (0)                                                                                                | 0.0 (0)                                                           |
|           |             |                               | Isoniazid                         | 0.0 (0)                                                                                              | 0.0 (0)                                                           | 0.0 (0)                                                                                                | 0.0 (0)                                                           |
|           |             |                               | Levofloxacin                      | 0.0 (0)                                                                                              | 0.0 (0)                                                           | 0.0 (0)                                                                                                | 0.0 (0)                                                           |
|           |             |                               | Linezolid                         | 0.0 (0)                                                                                              | 0.0 (0)                                                           | 0.0 (0)                                                                                                | 0.0 (0)                                                           |
|           |             |                               | Meropenem                         | 0.0 (0)                                                                                              | 0.0 (0)                                                           | 0.0 (0)                                                                                                | 0.0 (0)                                                           |
|           |             |                               | Metronidazole                     | 2.5 (1)                                                                                              | 0.0 (0)                                                           | 0.6 (1)                                                                                                | 0.0 (0)                                                           |
|           |             |                               | Minocycline                       | 0.0 (0)                                                                                              | 0.0 (0)                                                           | 0.0 (0)                                                                                                | 0.0 (0)                                                           |
|           |             |                               | Moxifloxacin                      | 0.0 (0)                                                                                              | 0.0 (0)                                                           | 0.0 (0)                                                                                                | 0.0 (0)                                                           |
|           |             |                               | Nitrofurantoin                    | 0.0 (0)                                                                                              | 0.0 (0)                                                           | 0.0 (0)                                                                                                | 0.0 (0)                                                           |
|           |             |                               | Polymyxin                         | 0.0 (0)                                                                                              | 0.0 (0)                                                           | 0.0 (0)                                                                                                | 0.0 (0)                                                           |
|           |             |                               | Pyrazinamide                      | 0.0 (0)                                                                                              | 0.0 (0)                                                           | 0.0 (0)                                                                                                | 0.0 (0)                                                           |
|           |             |                               | Rifampicin                        | 0.0 (0)                                                                                              | 0.0 (0)                                                           | 0.0 (0)                                                                                                | 0.0 (0)                                                           |
|           |             |                               | Trimethoprim-<br>sulfamethoxazole | 2.5 (1)                                                                                              | 0.0 (0)                                                           | 1.9 (3)                                                                                                | 1.2 (1)                                                           |
|           |             |                               | Vancomycin                        | 2.5 (1)                                                                                              | 0.0 (0)                                                           | 0.6 (1)                                                                                                | 0.0 (0)                                                           |

|                      |             |                            |                          |                         |                          |                          |          |         |
|----------------------|-------------|----------------------------|--------------------------|-------------------------|--------------------------|--------------------------|----------|---------|
|                      |             | Unknown antibiotic         | 0.0 (0)                  | 0.0 (0)                 | 0.0 (0)                  | 0.0 (0)                  |          |         |
| Australia            | Antivirals  | Abacavir                   | 0.0 (0)                  | 0.0 (0)                 | 0.0 (0)                  | 0.0 (0)                  |          |         |
|                      |             | Aciclovir                  | 0.0 (0)                  | 0.0 (0)                 | 1.3 (2)                  | 0.0 (0)                  |          |         |
|                      |             | Amantadine                 | 0.0 (0)                  | 0.0 (0)                 | 0.6 (1)                  | 0.0 (0)                  |          |         |
|                      |             | Efavirenz                  | 0.0 (0)                  | 0.0 (0)                 | 0.0 (0)                  | 0.0 (0)                  |          |         |
|                      |             | Emtricitabine              | 0.0 (0)                  | 0.0 (0)                 | 0.0 (0)                  | 0.0 (0)                  |          |         |
|                      |             | Ganciclovir                | 0.0 (0)                  | 0.0 (0)                 | 0.0 (0)                  | 0.0 (0)                  |          |         |
|                      |             | Lamivudine                 | 0.0 (0)                  | 0.0 (0)                 | 0.0 (0)                  | 0.0 (0)                  |          |         |
|                      |             | Lopinavir                  | 0.0 (0)                  | 0.0 (0)                 | 0.0 (0)                  | 0.0 (0)                  |          |         |
|                      |             | Nevirapine                 | 0.0 (0)                  | 0.0 (0)                 | 0.0 (0)                  | 0.0 (0)                  |          |         |
|                      |             | Oseltamivir                | 2.5 (1)                  | 35.1 (7)                | 1.9 (3)                  | 8.6 (7)                  |          |         |
|                      |             | Tenofovir                  | 0.0 (0)                  | 0.0 (0)                 | 0.0 (0)                  | 0.0 (0)                  |          |         |
|                      |             | Valaciclovir               | 0.0 (0)                  | 0.0 (0)                 | 0.0 (0)                  | 0.0 (0)                  |          |         |
|                      |             | Zidovudine                 | 0.0 (0)                  | 0.0 (0)                 | 0.0 (0)                  | 0.0 (0)                  |          |         |
|                      |             | Antifungals                | Fluconazole              | 0.0 (0)                 | 0.0 (0)                  | 0.0 (0)                  | 0.0 (0)  |         |
|                      |             |                            | Itraconazole             | 0.0 (0)                 | 0.0 (0)                  | 0.0 (0)                  | 0.0 (0)  |         |
| Ketoconazole         | 0.0 (0)     |                            | 0.0 (0)                  | 0.0 (0)                 | 0.0 (0)                  |                          |          |         |
| Miconazole           | 0.0 (0)     |                            | 0.0 (0)                  | 0.0 (0)                 | 0.0 (0)                  |                          |          |         |
| Nystatin             | 5.0 (2)     |                            | 5.0 (1)                  | 1.9 (3)                 | 1.2 (1)                  |                          |          |         |
| Unknown antifungal   | 0.0 (0)     |                            | 0.0 (0)                  | 0.0 (0)                 | 0.0 (0)                  |                          |          |         |
| Other antimicrobials | Ornidazole  | 0.0 (0)                    | 0.0 (0)                  | 0.0 (0)                 | 0.0 (0)                  |                          |          |         |
|                      |             |                            | <i>18.0 person-years</i> | <i>9.9 person-years</i> | <i>72.2 person-years</i> | <i>40.0 person-years</i> |          |         |
| Australia            | Antibiotics | Penicillins                | Amoxicillin              | 11.1 (2)                | 20.3 (2)                 | 16.6 (12)                | 15.0 (6) |         |
|                      |             |                            | Ampicillin               | 0.0 (0)                 | 0.0 (0)                  | 0.0 (0)                  | 0.0 (0)  |         |
|                      |             |                            | Cloxacillin              | 0.0 (0)                 | 0.0 (0)                  | 0.0 (0)                  | 0.0 (0)  |         |
|                      |             |                            | Dicloxacillin            | 0.0 (0)                 | 0.0 (0)                  | 0.0 (0)                  | 0.0 (0)  |         |
|                      |             |                            | Floxacillin              | 0.0 (0)                 | 0.0 (0)                  | 2.8 (2)                  | 0.0 (0)  |         |
|                      |             |                            | Oxacillin                | 0.0 (0)                 | 0.0 (0)                  | 0.0 (0)                  | 0.0 (0)  |         |
|                      |             |                            | Penicillin               | 5.6 (1)                 | 20.3 (2)                 | 1.4 (1)                  | 5.0 (2)  |         |
|                      |             |                            | Piperacillin             | 0.0 (0)                 | 0.0 (0)                  | 0.0 (0)                  | 0.0 (0)  |         |
|                      |             | Cephalosporins (I)         | Cefadroxil               | 0.0 (0)                 | 0.0 (0)                  | 0.0 (0)                  | 0.0 (0)  |         |
|                      |             |                            | Cefalexin                | 5.6 (1)                 | 0.0 (0)                  | 4.2 (3)                  | 2.5 (1)  |         |
|                      |             |                            | Cefalotin                | 0.0 (0)                 | 0.0 (0)                  | 0.0 (0)                  | 0.0 (0)  |         |
|                      |             |                            | Cefazolin                | 0.0 (0)                 | 0.0 (0)                  | 0.0 (0)                  | 0.0 (0)  |         |
|                      |             |                            | Cefradine                | 0.0 (0)                 | 0.0 (0)                  | 0.0 (0)                  | 0.0 (0)  |         |
|                      |             |                            |                          |                         |                          |                          |          |         |
|                      |             | Cephalosporins (II)        | Cefaclor                 | 0.0 (0)                 | 0.0 (0)                  | 0.0 (0)                  | 0.0 (0)  |         |
|                      |             |                            | Cefoxitin                | 0.0 (0)                 | 0.0 (0)                  | 0.0 (0)                  | 0.0 (0)  |         |
|                      |             |                            | Cefprozil                | 0.0 (0)                 | 0.0 (0)                  | 0.0 (0)                  | 0.0 (0)  |         |
|                      |             |                            | Cefuroxime axetil        | 0.0 (0)                 | 0.0 (0)                  | 0.0 (0)                  | 0.0 (0)  |         |
|                      |             |                            |                          |                         |                          |                          |          |         |
|                      |             | Cephalosporins (III or IV) | Cefdinir                 | 0.0 (0)                 | 0.0 (0)                  | 0.0 (0)                  | 0.0 (0)  |         |
|                      |             |                            | Cefditoren               | 0.0 (0)                 | 0.0 (0)                  | 0.0 (0)                  | 0.0 (0)  |         |
|                      |             |                            | Cefepime                 | 0.0 (0)                 | 0.0 (0)                  | 0.0 (0)                  | 0.0 (0)  |         |
|                      |             |                            | Cefixime                 | 0.0 (0)                 | 0.0 (0)                  | 0.0 (0)                  | 0.0 (0)  |         |
|                      |             |                            | Cefotaxime               | 0.0 (0)                 | 0.0 (0)                  | 0.0 (0)                  | 0.0 (0)  |         |
|                      |             |                            | Cefpodoxime              | 0.0 (0)                 | 0.0 (0)                  | 0.0 (0)                  | 0.0 (0)  |         |
|                      |             |                            | Ceftazidime              | 0.0 (0)                 | 0.0 (0)                  | 0.0 (0)                  | 0.0 (0)  |         |
|                      |             |                            | Ceftibuten               | 0.0 (0)                 | 0.0 (0)                  | 0.0 (0)                  | 0.0 (0)  |         |
|                      |             |                            | Ceftriaxone              | 0.0 (0)                 | 0.0 (0)                  | 0.0 (0)                  | 0.0 (0)  |         |
|                      |             |                            | Macrolides               | Azithromycin            | 0.0 (0)                  | 0.0 (0)                  | 0.0 (0)  | 0.0 (0) |
|                      |             |                            |                          | Clarithromycin          | 0.0 (0)                  | 0.0 (0)                  | 1.4 (1)  | 0.0 (0) |
|                      |             |                            |                          | Erythromycin            | 0.0 (0)                  | 0.0 (0)                  | 0.0 (0)  | 0.0 (0) |
|                      |             |                            |                          | Roxithromycin           | 0.0 (0)                  | 0.0 (0)                  | 0.0 (0)  | 0.0 (0) |
|                      |             |                            |                          |                         |                          |                          |          |         |
|                      |             | Aminoglycosides            | Amikacin                 | 0.0 (0)                 | 0.0 (0)                  | 0.0 (0)                  | 0.0 (0)  |         |
|                      |             |                            | Gentamicin               | 11.1 (2)                | 30.4 (3)                 | 2.8 (2)                  | 7.5 (3)  |         |
|                      |             |                            | Tobramycin               | 0.0 (0)                 | 0.0 (0)                  | 0.0 (0)                  | 0.0 (0)  |         |
|                      |             | Other antibiotics          | Bacitracin               | 0.0 (0)                 | 0.0 (0)                  | 0.0 (0)                  | 0.0 (0)  |         |
|                      |             |                            | Benzalkonium chloride    | 0.0 (0)                 | 0.0 (0)                  | 0.0 (0)                  | 0.0 (0)  |         |
|                      |             |                            | Chloramphenicol          | 0.0 (0)                 | 0.0 (0)                  | 0.0 (0)                  | 0.0 (0)  |         |
|                      |             |                            | Ciprofloxacin            | 0.0 (0)                 | 0.0 (0)                  | 0.0 (0)                  | 0.0 (0)  |         |
|                      |             |                            | Clindamycin              | 0.0 (0)                 | 0.0 (0)                  | 0.0 (0)                  | 0.0 (0)  |         |
|                      |             |                            | Doxycycline              | 0.0 (0)                 | 0.0 (0)                  | 0.0 (0)                  | 0.0 (0)  |         |
|                      |             |                            |                          |                         |                          |                          |          |         |
|                      |             |                            |                          |                         |                          |                          |          |         |



|                      |                               |                          |                         |                          |                          |
|----------------------|-------------------------------|--------------------------|-------------------------|--------------------------|--------------------------|
|                      | Ertapenem                     | 0.0 (0)                  | 0.0 (0)                 | 0.0 (0)                  | 0.0 (0)                  |
|                      | Ethambutol                    | 0.0 (0)                  | 0.0 (0)                 | 0.0 (0)                  | 0.0 (0)                  |
|                      | Fosfomycin                    | 0.0 (0)                  | 0.0 (0)                 | 0.0 (0)                  | 0.0 (0)                  |
|                      | Hexamine                      | 0.0 (0)                  | 0.0 (0)                 | 0.0 (0)                  | 0.0 (0)                  |
|                      | Isoniazid                     | 0.0 (0)                  | 0.0 (0)                 | 0.0 (0)                  | 0.0 (0)                  |
|                      | Levofloxacin                  | 0.0 (0)                  | 0.0 (0)                 | 0.0 (0)                  | 0.0 (0)                  |
|                      | Linezolid                     | 0.0 (0)                  | 0.0 (0)                 | 0.0 (0)                  | 0.0 (0)                  |
|                      | Meropenem                     | 0.0 (0)                  | 0.0 (0)                 | 0.0 (0)                  | 0.0 (0)                  |
|                      | Metronidazole                 | 0.0 (0)                  | 0.0 (0)                 | 0.0 (0)                  | 0.0 (0)                  |
|                      | Minocycline                   | 0.0 (0)                  | 0.0 (0)                 | 0.0 (0)                  | 0.0 (0)                  |
|                      | Moxifloxacin                  | 0.0 (0)                  | 0.0 (0)                 | 0.0 (0)                  | 0.0 (0)                  |
|                      | Nitrofurantoin                | 0.0 (0)                  | 0.0 (0)                 | 0.0 (0)                  | 0.0 (0)                  |
|                      | Polymyxin                     | 0.0 (0)                  | 0.0 (0)                 | 0.0 (0)                  | 0.0 (0)                  |
|                      | Pyrazinamide                  | 0.0 (0)                  | 0.0 (0)                 | 0.0 (0)                  | 0.0 (0)                  |
|                      | Rifampicin                    | 0.0 (0)                  | 0.0 (0)                 | 0.0 (0)                  | 0.0 (0)                  |
|                      | Trimethoprim-sulfamethoxazole | 0.0 (0)                  | 0.0 (0)                 | 0.0 (0)                  | 0.0 (0)                  |
|                      | Vancomycin                    | 0.0 (0)                  | 0.0 (0)                 | 0.0 (0)                  | 0.0 (0)                  |
|                      | Unknown antibiotic            | 0.0 (0)                  | 0.0 (0)                 | 0.0 (0)                  | 2.5 (1)                  |
| Antivirals           |                               |                          |                         |                          |                          |
|                      | Abacavir                      | 0.0 (0)                  | 0.0 (0)                 | 0.0 (0)                  | 0.0 (0)                  |
|                      | Aciclovir                     | 0.0 (0)                  | 0.0 (0)                 | 0.0 (0)                  | 0.0 (0)                  |
|                      | Amantadine                    | 0.0 (0)                  | 0.0 (0)                 | 0.0 (0)                  | 0.0 (0)                  |
|                      | Efavirenz                     | 0.0 (0)                  | 0.0 (0)                 | 0.0 (0)                  | 0.0 (0)                  |
|                      | Emtricitabine                 | 0.0 (0)                  | 0.0 (0)                 | 0.0 (0)                  | 0.0 (0)                  |
|                      | Ganciclovir                   | 0.0 (0)                  | 0.0 (0)                 | 0.0 (0)                  | 0.0 (0)                  |
|                      | Lamivudine                    | 0.0 (0)                  | 0.0 (0)                 | 0.0 (0)                  | 0.0 (0)                  |
|                      | Lopinavir                     | 0.0 (0)                  | 0.0 (0)                 | 0.0 (0)                  | 0.0 (0)                  |
|                      | Nevirapine                    | 0.0 (0)                  | 0.0 (0)                 | 0.0 (0)                  | 0.0 (0)                  |
|                      | Oseltamivir                   | 0.0 (0)                  | 0.0 (0)                 | 0.0 (0)                  | 0.0 (0)                  |
|                      | Tenofovir                     | 0.0 (0)                  | 0.0 (0)                 | 0.0 (0)                  | 0.0 (0)                  |
|                      | Valaciclovir                  | 0.0 (0)                  | 0.0 (0)                 | 0.0 (0)                  | 0.0 (0)                  |
|                      | Zidovudine                    | 0.0 (0)                  | 0.0 (0)                 | 0.0 (0)                  | 0.0 (0)                  |
| Antifungals          |                               |                          |                         |                          |                          |
|                      | Fluconazole                   | 0.0 (0)                  | 0.0 (0)                 | 0.0 (0)                  | 0.0 (0)                  |
|                      | Itraconazole                  | 0.0 (0)                  | 0.0 (0)                 | 0.0 (0)                  | 0.0 (0)                  |
|                      | Ketoconazole                  | 0.0 (0)                  | 0.0 (0)                 | 1.4 (1)                  | 0.0 (0)                  |
|                      | Miconazole                    | 0.0 (0)                  | 0.0 (0)                 | 1.4 (1)                  | 0.0 (0)                  |
|                      | Nystatin                      | 16.7 (3)                 | 40.6 (4)                | 4.2 (3)                  | 10.0 (4)                 |
|                      | Unknown antifungal            | 0.0 (0)                  | 0.0 (0)                 | 0.0 (0)                  | 0.0 (0)                  |
| Other antimicrobials |                               |                          |                         |                          |                          |
|                      | Ornidazole                    | 0.0 (0)                  | 0.0 (0)                 | 0.0 (0)                  | 0.0 (0)                  |
| Bangladesh           |                               |                          |                         |                          |                          |
|                      |                               | <i>20.0 person-years</i> | <i>9.1 person-years</i> | <i>82.2 person-years</i> | <i>37.4 person-years</i> |
| Antibiotics          |                               |                          |                         |                          |                          |
|                      | Penicillins                   |                          |                         |                          |                          |
|                      | Amoxicillin                   | 140.3 (28)               | 153.6 (14)              | 69.3 (57)                | 74.8 (28)                |
|                      | Ampicillin                    | 10.0 (2)                 | 11.0 (1)                | 2.4 (2)                  | 2.7 (1)                  |
|                      | Cloxacillin                   | 0.0 (0)                  | 0.0 (0)                 | 1.2 (1)                  | 0.0 (0)                  |
|                      | Dicloxacillin                 | 0.0 (0)                  | 0.0 (0)                 | 0.0 (0)                  | 0.0 (0)                  |
|                      | Floxacillin                   | 5.0 (1)                  | 0.0 (0)                 | 9.7 (8)                  | 0.0 (0)                  |
|                      | Oxacillin                     | 0.0 (0)                  | 0.0 (0)                 | 0.0 (0)                  | 0.0 (0)                  |
|                      | Penicillin                    | 0.0 (0)                  | 0.0 (0)                 | 0.0 (0)                  | 0.0 (0)                  |
|                      | Piperacillin                  | 0.0 (0)                  | 0.0 (0)                 | 0.0 (0)                  | 0.0 (0)                  |
|                      | Cephalosporins (I)            |                          |                         |                          |                          |
|                      | Cefadroxil                    | 0.0 (0)                  | 0.0 (0)                 | 0.0 (0)                  | 0.0 (0)                  |
|                      | Cefalexin                     | 0.0 (0)                  | 0.0 (0)                 | 0.0 (0)                  | 0.0 (0)                  |
|                      | Cefalotin                     | 0.0 (0)                  | 0.0 (0)                 | 0.0 (0)                  | 0.0 (0)                  |
|                      | Cefazolin                     | 0.0 (0)                  | 0.0 (0)                 | 0.0 (0)                  | 0.0 (0)                  |
|                      | Cefradine                     | 5.0 (1)                  | 0.0 (0)                 | 1.2 (1)                  | 0.0 (0)                  |
|                      | Cephalosporins (II)           |                          |                         |                          |                          |
|                      | Cefaclor                      | 60.1 (12)                | 65.8 (6)                | 18.2 (15)                | 21.4 (8)                 |
|                      | Cefoxitin                     | 0.0 (0)                  | 0.0 (0)                 | 0.0 (0)                  | 0.0 (0)                  |
|                      | Cefprozil                     | 0.0 (0)                  | 0.0 (0)                 | 0.0 (0)                  | 0.0 (0)                  |
|                      | Cefuroxime axetil             | 0.0 (0)                  | 0.0 (0)                 | 13.4 (11)                | 5.3 (2)                  |
|                      | Cephalosporins (III or IV)    |                          |                         |                          |                          |
|                      | Cefdinir                      | 0.0 (0)                  | 0.0 (0)                 | 0.0 (0)                  | 0.0 (0)                  |
|                      | Cefditoren                    | 0.0 (0)                  | 0.0 (0)                 | 0.0 (0)                  | 0.0 (0)                  |
|                      | Cefepime                      | 0.0 (0)                  | 0.0 (0)                 | 0.0 (0)                  | 0.0 (0)                  |
|                      | Cefixime                      | 20.0 (4)                 | 11.0 (1)                | 31.6 (26)                | 24.0 (9)                 |
|                      | Cefotaxime                    | 75.2 (15)                | 43.9 (4)                | 18.2 (15)                | 10.7 (4)                 |
|                      | Cefpodoxime                   | 190.4 (38)               | 186.5 (17)              | 66.9 (55)                | 77.5 (29)                |
|                      | Ceftazidime                   | 25.1 (5)                 | 11.0 (1)                | 12.2 (10)                | 2.7 (1)                  |

|       |                      |                               |                  |                  |                   |                   |
|-------|----------------------|-------------------------------|------------------|------------------|-------------------|-------------------|
|       |                      | Ceftibuten                    | 0.0 (0)          | 0.0 (0)          | 1.2 (1)           | 0.0 (0)           |
|       |                      | Ceftriaxone                   | 0.0 (0)          | 0.0 (0)          | 19.5 (16)         | 13.4 (5)          |
|       | Macrolides           |                               |                  |                  |                   |                   |
|       |                      | Azithromycin                  | 30.1 (6)         | 21.9 (2)         | 66.9 (55)         | 85.5 (32)         |
|       |                      | Clarithromycin                | 0.0 (0)          | 0.0 (0)          | 0.0 (0)           | 0.0 (0)           |
|       |                      | Erythromycin                  | 10.0 (2)         | 0.0 (0)          | 3.6 (3)           | 2.7 (1)           |
|       |                      | Roxithromycin                 | 0.0 (0)          | 0.0 (0)          | 0.0 (0)           | 0.0 (0)           |
|       | Aminoglycosides      |                               |                  |                  |                   |                   |
|       |                      | Amikacin                      | 10.0 (2)         | 0.0 (0)          | 6.1 (5)           | 2.7 (1)           |
|       |                      | Gentamicin                    | 55.1 (11)        | 43.9 (4)         | 13.4 (11)         | 10.7 (4)          |
|       |                      | Tobramycin                    | 0.0 (0)          | 0.0 (0)          | 0.0 (0)           | 0.0 (0)           |
|       | Other antibiotics    |                               |                  |                  |                   |                   |
|       |                      | Bacitracin                    | 0.0 (0)          | 0.0 (0)          | 0.0 (0)           | 0.0 (0)           |
|       |                      | Benzalkonium chloride         | 0.0 (0)          | 0.0 (0)          | 0.0 (0)           | 0.0 (0)           |
|       |                      | Chloramphenicol               | 0.0 (0)          | 0.0 (0)          | 0.0 (0)           | 0.0 (0)           |
|       |                      | Ciprofloxacin                 | 0.0 (0)          | 0.0 (0)          | 6.1 (5)           | 0.0 (0)           |
|       |                      | Clindamycin                   | 0.0 (0)          | 0.0 (0)          | 0.0 (0)           | 0.0 (0)           |
|       |                      | Doxycycline                   | 0.0 (0)          | 0.0 (0)          | 0.0 (0)           | 0.0 (0)           |
|       |                      | Ertapenem                     | 0.0 (0)          | 0.0 (0)          | 0.0 (0)           | 0.0 (0)           |
|       |                      | Ethambutol                    | 0.0 (0)          | 0.0 (0)          | 0.0 (0)           | 0.0 (0)           |
|       |                      | Fosfomycin                    | 0.0 (0)          | 0.0 (0)          | 0.0 (0)           | 0.0 (0)           |
|       |                      | Hexamine                      | 0.0 (0)          | 0.0 (0)          | 0.0 (0)           | 0.0 (0)           |
|       |                      | Isoniazid                     | 0.0 (0)          | 0.0 (0)          | 0.0 (0)           | 0.0 (0)           |
|       |                      | Levofloxacin                  | 0.0 (0)          | 0.0 (0)          | 0.0 (0)           | 2.7 (1)           |
|       |                      | Linezolid                     | 0.0 (0)          | 0.0 (0)          | 0.0 (0)           | 0.0 (0)           |
|       |                      | Meropenem                     | 0.0 (0)          | 0.0 (0)          | 0.0 (0)           | 0.0 (0)           |
|       |                      | Metronidazole                 | 0.0 (0)          | 0.0 (0)          | 17.0 (14)         | 16.0 (6)          |
|       |                      | Minocycline                   | 0.0 (0)          | 0.0 (0)          | 0.0 (0)           | 0.0 (0)           |
|       |                      | Moxifloxacin                  | 0.0 (0)          | 0.0 (0)          | 0.0 (0)           | 0.0 (0)           |
|       |                      | Nitrofurantoin                | 0.0 (0)          | 0.0 (0)          | 0.0 (0)           | 0.0 (0)           |
|       |                      | Polymyxin                     | 0.0 (0)          | 0.0 (0)          | 0.0 (0)           | 0.0 (0)           |
|       |                      | Pyrazinamide                  | 0.0 (0)          | 0.0 (0)          | 0.0 (0)           | 0.0 (0)           |
|       |                      | Rifampicin                    | 0.0 (0)          | 0.0 (0)          | 0.0 (0)           | 0.0 (0)           |
|       |                      | Trimethoprim-sulfamethoxazole | 0.0 (0)          | 0.0 (0)          | 0.0 (0)           | 5.3 (2)           |
|       |                      | Vancomycin                    | 0.0 (0)          | 0.0 (0)          | 0.0 (0)           | 0.0 (0)           |
|       |                      | Unknown antibiotic            | 0.0 (0)          | 0.0 (0)          | 0.0 (0)           | 0.0 (0)           |
|       | Antivirals           |                               |                  |                  |                   |                   |
|       |                      | Abacavir                      | 0.0 (0)          | 0.0 (0)          | 0.0 (0)           | 0.0 (0)           |
|       |                      | Aciclovir                     | 0.0 (0)          | 0.0 (0)          | 0.0 (0)           | 0.0 (0)           |
|       |                      | Amantadine                    | 0.0 (0)          | 0.0 (0)          | 0.0 (0)           | 0.0 (0)           |
|       |                      | Efavirenz                     | 0.0 (0)          | 0.0 (0)          | 0.0 (0)           | 0.0 (0)           |
|       |                      | Emtricitabine                 | 0.0 (0)          | 0.0 (0)          | 0.0 (0)           | 0.0 (0)           |
|       |                      | Ganciclovir                   | 0.0 (0)          | 0.0 (0)          | 0.0 (0)           | 0.0 (0)           |
|       |                      | Lamivudine                    | 0.0 (0)          | 0.0 (0)          | 0.0 (0)           | 0.0 (0)           |
|       |                      | Lopinavir                     | 0.0 (0)          | 0.0 (0)          | 0.0 (0)           | 0.0 (0)           |
|       |                      | Nevirapine                    | 0.0 (0)          | 0.0 (0)          | 0.0 (0)           | 0.0 (0)           |
|       |                      | Oseltamivir                   | 0.0 (0)          | 0.0 (0)          | 0.0 (0)           | 0.0 (0)           |
|       |                      | Tenofovir                     | 0.0 (0)          | 0.0 (0)          | 0.0 (0)           | 0.0 (0)           |
|       |                      | Valaciclovir                  | 0.0 (0)          | 0.0 (0)          | 0.0 (0)           | 0.0 (0)           |
|       |                      | Zidovudine                    | 0.0 (0)          | 0.0 (0)          | 0.0 (0)           | 0.0 (0)           |
|       | Antifungals          |                               |                  |                  |                   |                   |
|       |                      | Fluconazole                   | 0.0 (0)          | 0.0 (0)          | 0.0 (0)           | 0.0 (0)           |
|       |                      | Itraconazole                  | 0.0 (0)          | 0.0 (0)          | 0.0 (0)           | 0.0 (0)           |
|       |                      | Ketoconazole                  | 0.0 (0)          | 0.0 (0)          | 0.0 (0)           | 0.0 (0)           |
|       |                      | Miconazole                    | 0.0 (0)          | 21.9 (2)         | 0.0 (0)           | 5.3 (2)           |
|       |                      | Nystatin                      | 0.0 (0)          | 11.0 (1)         | 0.0 (0)           | 2.7 (1)           |
|       |                      | Unknown antifungal            | 0.0 (0)          | 0.0 (0)          | 0.0 (0)           | 0.0 (0)           |
|       | Other antimicrobials |                               |                  |                  |                   |                   |
|       |                      | Ornidazole                    | 0.0 (0)          | 0.0 (0)          | 0.0 (0)           | 0.0 (0)           |
| Chile |                      |                               |                  |                  |                   |                   |
|       |                      |                               | 4.7 person-years | 4.9 person-years | 18.8 person-years | 20.1 person-years |
|       | Antibiotics          |                               |                  |                  |                   |                   |
|       |                      | Penicillins                   |                  |                  |                   |                   |
|       |                      | Amoxicillin                   | 0.0 (0)          | 81.2 (4)         | 21.2 (4)          | 39.8 (8)          |
|       |                      | Ampicillin                    | 21.4 (1)         | 0.0 (0)          | 5.3 (1)           | 0.0 (0)           |
|       |                      | Cloxacillin                   | 0.0 (0)          | 20.3 (1)         | 0.0 (0)           | 5.0 (1)           |
|       |                      | Dicloxacillin                 | 0.0 (0)          | 0.0 (0)          | 0.0 (0)           | 0.0 (0)           |
|       |                      | Floxacillin                   | 0.0 (0)          | 20.3 (1)         | 0.0 (0)           | 5.0 (1)           |
|       |                      | Oxacillin                     | 0.0 (0)          | 0.0 (0)          | 0.0 (0)           | 0.0 (0)           |
|       |                      | Penicillin                    | 0.0 (0)          | 0.0 (0)          | 0.0 (0)           | 0.0 (0)           |
|       |                      | Piperacillin                  | 0.0 (0)          | 0.0 (0)          | 0.0 (0)           | 0.0 (0)           |
|       |                      | Cephalosporins (I)            |                  |                  |                   |                   |
|       |                      | Cefadroxil                    | 0.0 (0)          | 20.3 (1)         | 5.3 (1)           | 5.0 (1)           |

|             |                               |          |          |          |         |
|-------------|-------------------------------|----------|----------|----------|---------|
|             | Cefalexin                     | 0.0 (0)  | 0.0 (0)  | 0.0 (0)  | 0.0 (0) |
|             | Cefalotin                     | 0.0 (0)  | 0.0 (0)  | 0.0 (0)  | 0.0 (0) |
|             | Cefazolin                     | 0.0 (0)  | 0.0 (0)  | 0.0 (0)  | 0.0 (0) |
|             | Cefradine                     | 0.0 (0)  | 0.0 (0)  | 0.0 (0)  | 0.0 (0) |
|             | Cephalexin (II)               |          |          |          |         |
|             | Cefaclor                      | 0.0 (0)  | 0.0 (0)  | 0.0 (0)  | 0.0 (0) |
|             | Cefoxitin                     | 0.0 (0)  | 0.0 (0)  | 0.0 (0)  | 0.0 (0) |
|             | Cefprozil                     | 0.0 (0)  | 0.0 (0)  | 0.0 (0)  | 0.0 (0) |
|             | Cefuroxime axetil             | 0.0 (0)  | 0.0 (0)  | 0.0 (0)  | 0.0 (0) |
|             | Cephalexin (III or IV)        |          |          |          |         |
|             | Cefdinir                      | 0.0 (0)  | 0.0 (0)  | 0.0 (0)  | 0.0 (0) |
|             | Cefditoren                    | 0.0 (0)  | 0.0 (0)  | 0.0 (0)  | 0.0 (0) |
|             | Cefepime                      | 0.0 (0)  | 0.0 (0)  | 0.0 (0)  | 0.0 (0) |
|             | Cefixime                      | 0.0 (0)  | 0.0 (0)  | 0.0 (0)  | 0.0 (0) |
|             | Cefotaxime                    | 21.4 (1) | 0.0 (0)  | 5.3 (1)  | 0.0 (0) |
|             | Cefpodoxime                   | 0.0 (0)  | 0.0 (0)  | 0.0 (0)  | 0.0 (0) |
|             | Ceftazidime                   | 0.0 (0)  | 0.0 (0)  | 0.0 (0)  | 0.0 (0) |
|             | Ceftibuten                    | 0.0 (0)  | 0.0 (0)  | 0.0 (0)  | 0.0 (0) |
|             | Ceftriaxone                   | 0.0 (0)  | 0.0 (0)  | 0.0 (0)  | 0.0 (0) |
|             | Macrolides                    |          |          |          |         |
|             | Azithromycin                  | 42.7 (2) | 0.0 (0)  | 10.6 (2) | 5.0 (1) |
|             | Clarithromycin                | 0.0 (0)  | 0.0 (0)  | 0.0 (0)  | 0.0 (0) |
|             | Erythromycin                  | 0.0 (0)  | 0.0 (0)  | 0.0 (0)  | 0.0 (0) |
|             | Roxithromycin                 | 0.0 (0)  | 0.0 (0)  | 0.0 (0)  | 0.0 (0) |
|             | Aminoglycosides               |          |          |          |         |
|             | Amikacin                      | 0.0 (0)  | 0.0 (0)  | 0.0 (0)  | 0.0 (0) |
|             | Gentamicin                    | 0.0 (0)  | 0.0 (0)  | 0.0 (0)  | 0.0 (0) |
|             | Tobramycin                    | 0.0 (0)  | 0.0 (0)  | 0.0 (0)  | 0.0 (0) |
|             | Other antibiotics             |          |          |          |         |
|             | Bacitracin                    | 0.0 (0)  | 0.0 (0)  | 0.0 (0)  | 0.0 (0) |
|             | Benzalkonium chloride         | 0.0 (0)  | 0.0 (0)  | 0.0 (0)  | 0.0 (0) |
|             | Chloramphenicol               | 0.0 (0)  | 0.0 (0)  | 0.0 (0)  | 0.0 (0) |
|             | Ciprofloxacin                 | 0.0 (0)  | 0.0 (0)  | 0.0 (0)  | 0.0 (0) |
|             | Clindamycin                   | 0.0 (0)  | 0.0 (0)  | 0.0 (0)  | 0.0 (0) |
|             | Doxycycline                   | 0.0 (0)  | 0.0 (0)  | 0.0 (0)  | 0.0 (0) |
|             | Ertapenem                     | 0.0 (0)  | 0.0 (0)  | 0.0 (0)  | 0.0 (0) |
|             | Ethambutol                    | 0.0 (0)  | 0.0 (0)  | 0.0 (0)  | 0.0 (0) |
|             | Fosfomycin                    | 0.0 (0)  | 0.0 (0)  | 0.0 (0)  | 0.0 (0) |
|             | Hexamine                      | 0.0 (0)  | 0.0 (0)  | 0.0 (0)  | 0.0 (0) |
|             | Isoniazid                     | 0.0 (0)  | 0.0 (0)  | 0.0 (0)  | 5.0 (1) |
|             | Levofloxacin                  | 0.0 (0)  | 0.0 (0)  | 0.0 (0)  | 0.0 (0) |
|             | Linezolid                     | 0.0 (0)  | 0.0 (0)  | 0.0 (0)  | 0.0 (0) |
|             | Meropenem                     | 0.0 (0)  | 0.0 (0)  | 0.0 (0)  | 0.0 (0) |
|             | Metronidazole                 | 0.0 (0)  | 0.0 (0)  | 0.0 (0)  | 0.0 (0) |
|             | Minocycline                   | 0.0 (0)  | 0.0 (0)  | 0.0 (0)  | 0.0 (0) |
|             | Moxifloxacin                  | 0.0 (0)  | 0.0 (0)  | 0.0 (0)  | 0.0 (0) |
|             | Nitrofurantoin                | 0.0 (0)  | 0.0 (0)  | 0.0 (0)  | 0.0 (0) |
|             | Polymyxin                     | 0.0 (0)  | 0.0 (0)  | 0.0 (0)  | 0.0 (0) |
|             | Pyrazinamide                  | 0.0 (0)  | 0.0 (0)  | 0.0 (0)  | 0.0 (0) |
|             | Rifampicin                    | 0.0 (0)  | 0.0 (0)  | 0.0 (0)  | 0.0 (0) |
|             | Trimethoprim-sulfamethoxazole | 0.0 (0)  | 0.0 (0)  | 0.0 (0)  | 0.0 (0) |
|             | Vancomycin                    | 0.0 (0)  | 0.0 (0)  | 0.0 (0)  | 0.0 (0) |
|             | Unknown antibiotic            | 0.0 (0)  | 0.0 (0)  | 0.0 (0)  | 0.0 (0) |
| Antivirals  |                               |          |          |          |         |
|             | Abacavir                      | 0.0 (0)  | 0.0 (0)  | 0.0 (0)  | 5.0 (1) |
|             | Aciclovir                     | 0.0 (0)  | 40.6 (2) | 0.0 (0)  | 9.9 (2) |
|             | Amantadine                    | 0.0 (0)  | 0.0 (0)  | 0.0 (0)  | 0.0 (0) |
|             | Efavirenz                     | 0.0 (0)  | 0.0 (0)  | 0.0 (0)  | 0.0 (0) |
|             | Emtricitabine                 | 0.0 (0)  | 0.0 (0)  | 0.0 (0)  | 0.0 (0) |
|             | Ganciclovir                   | 0.0 (0)  | 0.0 (0)  | 0.0 (0)  | 0.0 (0) |
|             | Lamivudine                    | 0.0 (0)  | 0.0 (0)  | 0.0 (0)  | 0.0 (0) |
|             | Lopinavir                     | 0.0 (0)  | 0.0 (0)  | 0.0 (0)  | 0.0 (0) |
|             | Nevirapine                    | 0.0 (0)  | 0.0 (0)  | 0.0 (0)  | 0.0 (0) |
|             | Oseltamivir                   | 0.0 (0)  | 0.0 (0)  | 0.0 (0)  | 0.0 (0) |
|             | Tenofovir                     | 0.0 (0)  | 0.0 (0)  | 0.0 (0)  | 0.0 (0) |
|             | Valaciclovir                  | 0.0 (0)  | 0.0 (0)  | 0.0 (0)  | 0.0 (0) |
|             | Zidovudine                    | 0.0 (0)  | 0.0 (0)  | 0.0 (0)  | 0.0 (0) |
| Antifungals |                               |          |          |          |         |
|             | Fluconazole                   | 0.0 (0)  | 0.0 (0)  | 0.0 (0)  | 0.0 (0) |
|             | Itraconazole                  | 0.0 (0)  | 0.0 (0)  | 0.0 (0)  | 0.0 (0) |
|             | Ketoconazole                  | 0.0 (0)  | 0.0 (0)  | 0.0 (0)  | 0.0 (0) |
|             | Miconazole                    | 0.0 (0)  | 0.0 (0)  | 0.0 (0)  | 0.0 (0) |
|             | Nystatin                      | 0.0 (0)  | 0.0 (0)  | 0.0 (0)  | 0.0 (0) |
|             | Unknown antifungal            | 0.0 (0)  | 0.0 (0)  | 0.0 (0)  | 0.0 (0) |

| Other antimicrobials |                               |                         |                         |                          |                          |
|----------------------|-------------------------------|-------------------------|-------------------------|--------------------------|--------------------------|
| Spain                | Ornidazole                    | 0.0 (0)                 | 0.0 (0)                 | 0.0 (0)                  | 0.0 (0)                  |
|                      |                               | <i>6.3 person-years</i> | <i>3.0 person-years</i> | <i>25.1 person-years</i> | <i>11.8 person-years</i> |
| Antibiotics          |                               |                         |                         |                          |                          |
|                      | Penicillins                   |                         |                         |                          |                          |
|                      | Amoxicillin                   | 47.5 (3)                | 33.8 (1)                | 39.9 (10)                | 42.5 (5)                 |
|                      | Ampicillin                    | 31.6 (2)                | 33.8 (1)                | 8.0 (2)                  | 8.5 (1)                  |
|                      | Cloxacillin                   | 0.0 (0)                 | 0.0 (0)                 | 0.0 (0)                  | 0.0 (0)                  |
|                      | Dicloxacillin                 | 0.0 (0)                 | 0.0 (0)                 | 0.0 (0)                  | 0.0 (0)                  |
|                      | Floxacillin                   | 0.0 (0)                 | 0.0 (0)                 | 0.0 (0)                  | 0.0 (0)                  |
|                      | Oxacillin                     | 0.0 (0)                 | 0.0 (0)                 | 0.0 (0)                  | 0.0 (0)                  |
|                      | Penicillin                    | 0.0 (0)                 | 0.0 (0)                 | 0.0 (0)                  | 0.0 (0)                  |
|                      | Piperacillin                  | 0.0 (0)                 | 0.0 (0)                 | 0.0 (0)                  | 0.0 (0)                  |
|                      | Cephalosporins (I)            |                         |                         |                          |                          |
|                      | Cefadroxil                    | 0.0 (0)                 | 0.0 (0)                 | 0.0 (0)                  | 0.0 (0)                  |
|                      | Cefalexin                     | 0.0 (0)                 | 0.0 (0)                 | 0.0 (0)                  | 0.0 (0)                  |
|                      | Cefalotin                     | 0.0 (0)                 | 0.0 (0)                 | 0.0 (0)                  | 0.0 (0)                  |
|                      | Cefazolin                     | 0.0 (0)                 | 0.0 (0)                 | 0.0 (0)                  | 0.0 (0)                  |
|                      | Cefradine                     | 0.0 (0)                 | 0.0 (0)                 | 0.0 (0)                  | 0.0 (0)                  |
|                      | Cephalosporins (II)           |                         |                         |                          |                          |
|                      | Cefaclor                      | 0.0 (0)                 | 0.0 (0)                 | 0.0 (0)                  | 0.0 (0)                  |
|                      | Cefoxitin                     | 0.0 (0)                 | 0.0 (0)                 | 0.0 (0)                  | 0.0 (0)                  |
|                      | Cefprozil                     | 0.0 (0)                 | 0.0 (0)                 | 0.0 (0)                  | 0.0 (0)                  |
|                      | Cefuroxime axetil             | 0.0 (0)                 | 0.0 (0)                 | 0.0 (0)                  | 0.0 (0)                  |
|                      | Cephalosporins (III or IV)    |                         |                         |                          |                          |
|                      | Cefdinir                      | 0.0 (0)                 | 0.0 (0)                 | 0.0 (0)                  | 0.0 (0)                  |
|                      | Cefditoren                    | 0.0 (0)                 | 0.0 (0)                 | 0.0 (0)                  | 0.0 (0)                  |
|                      | Cefepime                      | 0.0 (0)                 | 0.0 (0)                 | 0.0 (0)                  | 0.0 (0)                  |
|                      | Cefixime                      | 15.8 (1)                | 33.8 (1)                | 8.0 (2)                  | 8.5 (1)                  |
|                      | Cefotaxime                    | 15.8 (1)                | 0.0 (0)                 | 4.0 (1)                  | 0.0 (0)                  |
|                      | Cefpodoxime                   | 0.0 (0)                 | 0.0 (0)                 | 0.0 (0)                  | 0.0 (0)                  |
|                      | Ceftazidime                   | 0.0 (0)                 | 0.0 (0)                 | 0.0 (0)                  | 0.0 (0)                  |
|                      | Ceftibuten                    | 0.0 (0)                 | 0.0 (0)                 | 0.0 (0)                  | 0.0 (0)                  |
|                      | Ceftriaxone                   | 0.0 (0)                 | 0.0 (0)                 | 0.0 (0)                  | 0.0 (0)                  |
|                      | Macrolides                    |                         |                         |                          |                          |
|                      | Azithromycin                  | 15.8 (1)                | 0.0 (0)                 | 12.0 (3)                 | 0.0 (0)                  |
|                      | Clarithromycin                | 0.0 (0)                 | 0.0 (0)                 | 0.0 (0)                  | 0.0 (0)                  |
|                      | Erythromycin                  | 0.0 (0)                 | 0.0 (0)                 | 0.0 (0)                  | 0.0 (0)                  |
|                      | Roxithromycin                 | 0.0 (0)                 | 0.0 (0)                 | 0.0 (0)                  | 0.0 (0)                  |
|                      | Aminoglycosides               |                         |                         |                          |                          |
|                      | Amikacin                      | 0.0 (0)                 | 0.0 (0)                 | 0.0 (0)                  | 0.0 (0)                  |
|                      | Gentamicin                    | 47.5 (3)                | 33.8 (1)                | 12.0 (3)                 | 8.5 (1)                  |
|                      | Tobramycin                    | 0.0 (0)                 | 0.0 (0)                 | 0.0 (0)                  | 0.0 (0)                  |
|                      | Other antibiotics             |                         |                         |                          |                          |
|                      | Bacitracin                    | 0.0 (0)                 | 0.0 (0)                 | 0.0 (0)                  | 0.0 (0)                  |
|                      | Benzalkonium chloride         | 0.0 (0)                 | 0.0 (0)                 | 0.0 (0)                  | 0.0 (0)                  |
|                      | Chloramphenicol               | 0.0 (0)                 | 0.0 (0)                 | 0.0 (0)                  | 0.0 (0)                  |
|                      | Ciprofloxacin                 | 0.0 (0)                 | 0.0 (0)                 | 0.0 (0)                  | 0.0 (0)                  |
|                      | Clindamycin                   | 0.0 (0)                 | 0.0 (0)                 | 0.0 (0)                  | 0.0 (0)                  |
|                      | Doxycycline                   | 0.0 (0)                 | 0.0 (0)                 | 0.0 (0)                  | 0.0 (0)                  |
|                      | Ertapenem                     | 0.0 (0)                 | 0.0 (0)                 | 0.0 (0)                  | 0.0 (0)                  |
|                      | Ethambutol                    | 0.0 (0)                 | 0.0 (0)                 | 0.0 (0)                  | 0.0 (0)                  |
|                      | Fosfomicin                    | 0.0 (0)                 | 0.0 (0)                 | 0.0 (0)                  | 0.0 (0)                  |
|                      | Hexamine                      | 0.0 (0)                 | 0.0 (0)                 | 0.0 (0)                  | 0.0 (0)                  |
|                      | Isoniazid                     | 0.0 (0)                 | 0.0 (0)                 | 0.0 (0)                  | 0.0 (0)                  |
|                      | Levofloxacin                  | 0.0 (0)                 | 0.0 (0)                 | 0.0 (0)                  | 0.0 (0)                  |
|                      | Linezolid                     | 0.0 (0)                 | 0.0 (0)                 | 0.0 (0)                  | 0.0 (0)                  |
|                      | Meropenem                     | 0.0 (0)                 | 0.0 (0)                 | 0.0 (0)                  | 0.0 (0)                  |
|                      | Metronidazole                 | 0.0 (0)                 | 0.0 (0)                 | 4.0 (1)                  | 0.0 (0)                  |
|                      | Minocycline                   | 0.0 (0)                 | 0.0 (0)                 | 0.0 (0)                  | 0.0 (0)                  |
|                      | Moxifloxacin                  | 0.0 (0)                 | 0.0 (0)                 | 0.0 (0)                  | 0.0 (0)                  |
|                      | Nitrofurantoin                | 0.0 (0)                 | 0.0 (0)                 | 0.0 (0)                  | 0.0 (0)                  |
|                      | Polymyxin                     | 0.0 (0)                 | 0.0 (0)                 | 0.0 (0)                  | 0.0 (0)                  |
|                      | Pyrazinamide                  | 0.0 (0)                 | 0.0 (0)                 | 0.0 (0)                  | 0.0 (0)                  |
|                      | Rifampicin                    | 0.0 (0)                 | 0.0 (0)                 | 0.0 (0)                  | 0.0 (0)                  |
|                      | Trimethoprim-sulfamethoxazole | 0.0 (0)                 | 0.0 (0)                 | 0.0 (0)                  | 0.0 (0)                  |
|                      | Vancomycin                    | 0.0 (0)                 | 0.0 (0)                 | 0.0 (0)                  | 0.0 (0)                  |
|                      | Unknown antibiotic            | 0.0 (0)                 | 0.0 (0)                 | 0.0 (0)                  | 0.0 (0)                  |
|                      | Antivirals                    |                         |                         |                          |                          |
|                      | Abacavir                      | 0.0 (0)                 | 0.0 (0)                 | 0.0 (0)                  | 0.0 (0)                  |
|                      | Aciclovir                     | 0.0 (0)                 | 0.0 (0)                 | 0.0 (0)                  | 0.0 (0)                  |

|        |                      |                            |                         |                         |                         |                         |
|--------|----------------------|----------------------------|-------------------------|-------------------------|-------------------------|-------------------------|
|        |                      | Amantadine                 | 0.0 (0)                 | 0.0 (0)                 | 0.0 (0)                 | 0.0 (0)                 |
|        |                      | Efavirenz                  | 0.0 (0)                 | 0.0 (0)                 | 0.0 (0)                 | 0.0 (0)                 |
|        |                      | Emtricitabine              | 0.0 (0)                 | 0.0 (0)                 | 0.0 (0)                 | 0.0 (0)                 |
|        |                      | Ganciclovir                | 0.0 (0)                 | 0.0 (0)                 | 0.0 (0)                 | 0.0 (0)                 |
|        |                      | Lamivudine                 | 0.0 (0)                 | 0.0 (0)                 | 0.0 (0)                 | 0.0 (0)                 |
|        |                      | Lopinavir                  | 0.0 (0)                 | 0.0 (0)                 | 0.0 (0)                 | 0.0 (0)                 |
|        |                      | Nevirapine                 | 0.0 (0)                 | 0.0 (0)                 | 0.0 (0)                 | 0.0 (0)                 |
|        |                      | Oseltamivir                | 0.0 (0)                 | 0.0 (0)                 | 0.0 (0)                 | 0.0 (0)                 |
|        |                      | Tenofovir                  | 0.0 (0)                 | 0.0 (0)                 | 0.0 (0)                 | 0.0 (0)                 |
|        |                      | Valaciclovir               | 0.0 (0)                 | 0.0 (0)                 | 0.0 (0)                 | 0.0 (0)                 |
|        |                      | Zidovudine                 | 0.0 (0)                 | 0.0 (0)                 | 0.0 (0)                 | 0.0 (0)                 |
|        | Antifungals          |                            |                         |                         |                         |                         |
|        |                      | Fluconazole                | 0.0 (0)                 | 0.0 (0)                 | 0.0 (0)                 | 0.0 (0)                 |
|        |                      | Itraconazole               | 0.0 (0)                 | 0.0 (0)                 | 0.0 (0)                 | 0.0 (0)                 |
|        |                      | Ketoconazole               | 0.0 (0)                 | 0.0 (0)                 | 0.0 (0)                 | 0.0 (0)                 |
|        |                      | Miconazole                 | 0.0 (0)                 | 67.6 (2)                | 8.0 (2)                 | 17.0 (2)                |
|        |                      | Nystatin                   | 0.0 (0)                 | 0.0 (0)                 | 4.0 (1)                 | 0.0 (0)                 |
|        |                      | Unknown antifungal         | 0.0 (0)                 | 0.0 (0)                 | 0.0 (0)                 | 0.0 (0)                 |
|        | Other antimicrobials |                            |                         |                         |                         |                         |
|        |                      | Ornidazole                 | 0.0 (0)                 | 0.0 (0)                 | 0.0 (0)                 | 0.0 (0)                 |
| Mexico |                      |                            |                         |                         |                         |                         |
|        |                      |                            | <i>1.7 person-years</i> | <i>1.0 person-years</i> | <i>6.8 person-years</i> | <i>4.0 person-years</i> |
|        | Antibiotics          |                            |                         |                         |                         |                         |
|        |                      | Penicillins                |                         |                         |                         |                         |
|        |                      | Amoxicillin                | 0.0 (0)                 | 0.0 (0)                 | 14.6 (1)                | 0.0 (0)                 |
|        |                      | Ampicillin                 | 0.0 (0)                 | 0.0 (0)                 | 0.0 (0)                 | 0.0 (0)                 |
|        |                      | Cloxacillin                | 0.0 (0)                 | 0.0 (0)                 | 0.0 (0)                 | 0.0 (0)                 |
|        |                      | Dicloxacillin              | 0.0 (0)                 | 0.0 (0)                 | 0.0 (0)                 | 0.0 (0)                 |
|        |                      | Floxacillin                | 0.0 (0)                 | 0.0 (0)                 | 0.0 (0)                 | 0.0 (0)                 |
|        |                      | Oxacillin                  | 0.0 (0)                 | 0.0 (0)                 | 0.0 (0)                 | 0.0 (0)                 |
|        |                      | Penicillin                 | 0.0 (0)                 | 0.0 (0)                 | 0.0 (0)                 | 0.0 (0)                 |
|        |                      | Piperacillin               | 0.0 (0)                 | 0.0 (0)                 | 0.0 (0)                 | 0.0 (0)                 |
|        |                      | Cephalosporins (I)         |                         |                         |                         |                         |
|        |                      | Cefadroxil                 | 0.0 (0)                 | 0.0 (0)                 | 0.0 (0)                 | 0.0 (0)                 |
|        |                      | Cefalexin                  | 0.0 (0)                 | 0.0 (0)                 | 0.0 (0)                 | 0.0 (0)                 |
|        |                      | Cefalotin                  | 0.0 (0)                 | 0.0 (0)                 | 0.0 (0)                 | 0.0 (0)                 |
|        |                      | Cefazolin                  | 0.0 (0)                 | 0.0 (0)                 | 0.0 (0)                 | 0.0 (0)                 |
|        |                      | Cefradine                  | 0.0 (0)                 | 0.0 (0)                 | 0.0 (0)                 | 0.0 (0)                 |
|        |                      | Cephalosporins (II)        |                         |                         |                         |                         |
|        |                      | Cefaclor                   | 0.0 (0)                 | 0.0 (0)                 | 0.0 (0)                 | 0.0 (0)                 |
|        |                      | Cefoxitin                  | 0.0 (0)                 | 0.0 (0)                 | 0.0 (0)                 | 0.0 (0)                 |
|        |                      | Cefprozil                  | 0.0 (0)                 | 0.0 (0)                 | 0.0 (0)                 | 0.0 (0)                 |
|        |                      | Cefuroxime axetil          | 0.0 (0)                 | 0.0 (0)                 | 0.0 (0)                 | 0.0 (0)                 |
|        |                      | Cephalosporins (III or IV) |                         |                         |                         |                         |
|        |                      | Cefdinir                   | 0.0 (0)                 | 0.0 (0)                 | 0.0 (0)                 | 0.0 (0)                 |
|        |                      | Cefditoren                 | 0.0 (0)                 | 0.0 (0)                 | 0.0 (0)                 | 0.0 (0)                 |
|        |                      | Cefepime                   | 0.0 (0)                 | 0.0 (0)                 | 0.0 (0)                 | 0.0 (0)                 |
|        |                      | Cefixime                   | 0.0 (0)                 | 0.0 (0)                 | 0.0 (0)                 | 0.0 (0)                 |
|        |                      | Cefotaxime                 | 0.0 (0)                 | 0.0 (0)                 | 0.0 (0)                 | 0.0 (0)                 |
|        |                      | Cefpodoxime                | 0.0 (0)                 | 0.0 (0)                 | 0.0 (0)                 | 0.0 (0)                 |
|        |                      | Ceftazidime                | 0.0 (0)                 | 0.0 (0)                 | 0.0 (0)                 | 0.0 (0)                 |
|        |                      | Ceftibuten                 | 0.0 (0)                 | 0.0 (0)                 | 0.0 (0)                 | 0.0 (0)                 |
|        |                      | Ceftriaxone                | 0.0 (0)                 | 0.0 (0)                 | 0.0 (0)                 | 0.0 (0)                 |
|        |                      | Macrolides                 |                         |                         |                         |                         |
|        |                      | Azithromycin               | 0.0 (0)                 | 0.0 (0)                 | 0.0 (0)                 | 0.0 (0)                 |
|        |                      | Clarithromycin             | 0.0 (0)                 | 202.9 (2)               | 0.0 (0)                 | 49.7 (2)                |
|        |                      | Erythromycin               | 0.0 (0)                 | 0.0 (0)                 | 0.0 (0)                 | 0.0 (0)                 |
|        |                      | Roxithromycin              | 0.0 (0)                 | 0.0 (0)                 | 0.0 (0)                 | 0.0 (0)                 |
|        |                      | Aminoglycosides            |                         |                         |                         |                         |
|        |                      | Amikacin                   | 0.0 (0)                 | 0.0 (0)                 | 0.0 (0)                 | 0.0 (0)                 |
|        |                      | Gentamicin                 | 0.0 (0)                 | 0.0 (0)                 | 0.0 (0)                 | 0.0 (0)                 |
|        |                      | Tobramycin                 | 0.0 (0)                 | 0.0 (0)                 | 0.0 (0)                 | 0.0 (0)                 |
|        |                      | Other antibiotics          |                         |                         |                         |                         |
|        |                      | Bacitracin                 | 0.0 (0)                 | 0.0 (0)                 | 0.0 (0)                 | 0.0 (0)                 |
|        |                      | Benzalkonium chloride      | 0.0 (0)                 | 0.0 (0)                 | 0.0 (0)                 | 0.0 (0)                 |
|        |                      | Chloramphenicol            | 0.0 (0)                 | 0.0 (0)                 | 0.0 (0)                 | 0.0 (0)                 |
|        |                      | Ciprofloxacin              | 0.0 (0)                 | 0.0 (0)                 | 0.0 (0)                 | 0.0 (0)                 |
|        |                      | Clindamycin                | 0.0 (0)                 | 0.0 (0)                 | 0.0 (0)                 | 0.0 (0)                 |
|        |                      | Doxycycline                | 0.0 (0)                 | 0.0 (0)                 | 0.0 (0)                 | 0.0 (0)                 |
|        |                      | Ertapenem                  | 0.0 (0)                 | 0.0 (0)                 | 0.0 (0)                 | 0.0 (0)                 |
|        |                      | Ethambutol                 | 0.0 (0)                 | 0.0 (0)                 | 0.0 (0)                 | 0.0 (0)                 |
|        |                      | Fosfomycin                 | 0.0 (0)                 | 0.0 (0)                 | 0.0 (0)                 | 0.0 (0)                 |
|        |                      | Hexamine                   | 0.0 (0)                 | 0.0 (0)                 | 0.0 (0)                 | 0.0 (0)                 |

|                      |                               |                          |                          |                           |                          |
|----------------------|-------------------------------|--------------------------|--------------------------|---------------------------|--------------------------|
|                      | Isoniazid                     | 0.0 (0)                  | 0.0 (0)                  | 0.0 (0)                   | 0.0 (0)                  |
|                      | Levofloxacin                  | 0.0 (0)                  | 0.0 (0)                  | 0.0 (0)                   | 0.0 (0)                  |
|                      | Linezolid                     | 0.0 (0)                  | 0.0 (0)                  | 0.0 (0)                   | 0.0 (0)                  |
|                      | Meropenem                     | 0.0 (0)                  | 0.0 (0)                  | 0.0 (0)                   | 0.0 (0)                  |
|                      | Metronidazole                 | 0.0 (0)                  | 0.0 (0)                  | 0.0 (0)                   | 0.0 (0)                  |
|                      | Minocycline                   | 0.0 (0)                  | 0.0 (0)                  | 0.0 (0)                   | 0.0 (0)                  |
|                      | Moxifloxacin                  | 0.0 (0)                  | 0.0 (0)                  | 0.0 (0)                   | 0.0 (0)                  |
|                      | Nitrofurantoin                | 0.0 (0)                  | 0.0 (0)                  | 0.0 (0)                   | 0.0 (0)                  |
|                      | Polymyxin                     | 0.0 (0)                  | 0.0 (0)                  | 0.0 (0)                   | 0.0 (0)                  |
|                      | Pyrazinamide                  | 0.0 (0)                  | 0.0 (0)                  | 0.0 (0)                   | 0.0 (0)                  |
|                      | Rifampicin                    | 0.0 (0)                  | 0.0 (0)                  | 0.0 (0)                   | 0.0 (0)                  |
|                      | Trimethoprim-sulfamethoxazole | 0.0 (0)                  | 0.0 (0)                  | 0.0 (0)                   | 0.0 (0)                  |
|                      | Vancomycin                    | 0.0 (0)                  | 0.0 (0)                  | 0.0 (0)                   | 0.0 (0)                  |
|                      | Unknown antibiotic            | 0.0 (0)                  | 0.0 (0)                  | 0.0 (0)                   | 0.0 (0)                  |
| Antivirals           |                               |                          |                          |                           |                          |
|                      | Abacavir                      | 0.0 (0)                  | 0.0 (0)                  | 0.0 (0)                   | 0.0 (0)                  |
|                      | Aciclovir                     | 0.0 (0)                  | 0.0 (0)                  | 0.0 (0)                   | 0.0 (0)                  |
|                      | Amantadine                    | 0.0 (0)                  | 0.0 (0)                  | 0.0 (0)                   | 0.0 (0)                  |
|                      | Efavirenz                     | 0.0 (0)                  | 0.0 (0)                  | 0.0 (0)                   | 0.0 (0)                  |
|                      | Emtricitabine                 | 0.0 (0)                  | 0.0 (0)                  | 0.0 (0)                   | 0.0 (0)                  |
|                      | Ganciclovir                   | 0.0 (0)                  | 0.0 (0)                  | 0.0 (0)                   | 0.0 (0)                  |
|                      | Lamivudine                    | 0.0 (0)                  | 0.0 (0)                  | 0.0 (0)                   | 0.0 (0)                  |
|                      | Lopinavir                     | 0.0 (0)                  | 0.0 (0)                  | 0.0 (0)                   | 0.0 (0)                  |
|                      | Nevirapine                    | 0.0 (0)                  | 0.0 (0)                  | 0.0 (0)                   | 0.0 (0)                  |
|                      | Oseltamivir                   | 0.0 (0)                  | 0.0 (0)                  | 0.0 (0)                   | 0.0 (0)                  |
|                      | Tenofovir                     | 0.0 (0)                  | 0.0 (0)                  | 0.0 (0)                   | 0.0 (0)                  |
|                      | Valaciclovir                  | 0.0 (0)                  | 0.0 (0)                  | 0.0 (0)                   | 0.0 (0)                  |
|                      | Zidovudine                    | 0.0 (0)                  | 0.0 (0)                  | 0.0 (0)                   | 0.0 (0)                  |
| Antifungals          |                               |                          |                          |                           |                          |
|                      | Fluconazole                   | 0.0 (0)                  | 0.0 (0)                  | 0.0 (0)                   | 0.0 (0)                  |
|                      | Itraconazole                  | 0.0 (0)                  | 0.0 (0)                  | 0.0 (0)                   | 0.0 (0)                  |
|                      | Ketoconazole                  | 0.0 (0)                  | 0.0 (0)                  | 0.0 (0)                   | 0.0 (0)                  |
|                      | Miconazole                    | 0.0 (0)                  | 0.0 (0)                  | 0.0 (0)                   | 0.0 (0)                  |
|                      | Nystatin                      | 0.0 (0)                  | 0.0 (0)                  | 0.0 (0)                   | 0.0 (0)                  |
|                      | Unknown antifungal            | 0.0 (0)                  | 0.0 (0)                  | 0.0 (0)                   | 0.0 (0)                  |
| Other antimicrobials |                               |                          |                          |                           |                          |
|                      | Ornidazole                    | 0.0 (0)                  | 0.0 (0)                  | 0.0 (0)                   | 0.0 (0)                  |
| New Zealand          |                               |                          |                          |                           |                          |
|                      |                               | <i>35.9 person-years</i> | <i>21.5 person-years</i> | <i>141.4 person-years</i> | <i>84.2 person-years</i> |
| Antibiotics          |                               |                          |                          |                           |                          |
|                      | Penicillins                   |                          |                          |                           |                          |
|                      | Amoxicillin                   | 41.8 (15)                | 69.8 (15)                | 60.1 (85)                 | 57.0 (48)                |
|                      | Ampicillin                    | 0.0 (0)                  | 0.0 (0)                  | 0.0 (0)                   | 0.0 (0)                  |
|                      | Cloxacillin                   | 0.0 (0)                  | 0.0 (0)                  | 0.0 (0)                   | 0.0 (0)                  |
|                      | Dicloxacillin                 | 0.0 (0)                  | 0.0 (0)                  | 0.0 (0)                   | 0.0 (0)                  |
|                      | Floxacillin                   | 2.8 (1)                  | 0.0 (0)                  | 2.1 (3)                   | 0.0 (0)                  |
|                      | Oxacillin                     | 0.0 (0)                  | 0.0 (0)                  | 0.0 (0)                   | 0.0 (0)                  |
|                      | Penicillin                    | 8.4 (3)                  | 4.7 (1)                  | 2.1 (3)                   | 1.2 (1)                  |
|                      | Piperacillin                  | 0.0 (0)                  | 0.0 (0)                  | 0.0 (0)                   | 0.0 (0)                  |
|                      | Cephalosporins (I)            |                          |                          |                           |                          |
|                      | Cefadroxil                    | 0.0 (0)                  | 0.0 (0)                  | 0.0 (0)                   | 0.0 (0)                  |
|                      | Cefalexin                     | 2.8 (1)                  | 0.0 (0)                  | 4.2 (6)                   | 5.9 (5)                  |
|                      | Cefalotin                     | 0.0 (0)                  | 0.0 (0)                  | 0.0 (0)                   | 0.0 (0)                  |
|                      | Cefazolin                     | 0.0 (0)                  | 0.0 (0)                  | 0.7 (1)                   | 0.0 (0)                  |
|                      | Cefradine                     | 0.0 (0)                  | 0.0 (0)                  | 0.0 (0)                   | 0.0 (0)                  |
|                      | Cephalosporins (II)           |                          |                          |                           |                          |
|                      | Cefaclor                      | 0.0 (0)                  | 4.7 (1)                  | 2.8 (4)                   | 3.6 (3)                  |
|                      | Cefoxitin                     | 0.0 (0)                  | 0.0 (0)                  | 0.0 (0)                   | 0.0 (0)                  |
|                      | Cefprozil                     | 0.0 (0)                  | 0.0 (0)                  | 0.0 (0)                   | 0.0 (0)                  |
|                      | Cefuroxime axetil             | 2.8 (1)                  | 4.7 (1)                  | 1.4 (2)                   | 1.2 (1)                  |
|                      | Cephalosporins (III or IV)    |                          |                          |                           |                          |
|                      | Cefdinir                      | 0.0 (0)                  | 0.0 (0)                  | 0.0 (0)                   | 0.0 (0)                  |
|                      | Cefditoren                    | 0.0 (0)                  | 0.0 (0)                  | 0.0 (0)                   | 0.0 (0)                  |
|                      | Cefepime                      | 0.0 (0)                  | 0.0 (0)                  | 0.0 (0)                   | 0.0 (0)                  |
|                      | Cefixime                      | 0.0 (0)                  | 0.0 (0)                  | 0.0 (0)                   | 0.0 (0)                  |
|                      | Cefotaxime                    | 16.7 (6)                 | 46.5 (10)                | 4.9 (7)                   | 11.9 (10)                |
|                      | Cefpodoxime                   | 0.0 (0)                  | 0.0 (0)                  | 0.0 (0)                   | 0.0 (0)                  |
|                      | Ceftazidime                   | 0.0 (0)                  | 0.0 (0)                  | 0.0 (0)                   | 0.0 (0)                  |
|                      | Ceftibuten                    | 0.0 (0)                  | 0.0 (0)                  | 0.0 (0)                   | 0.0 (0)                  |
|                      | Ceftriaxone                   | 2.8 (1)                  | 0.0 (0)                  | 0.7 (1)                   | 0.0 (0)                  |
|                      | Macrolides                    |                          |                          |                           |                          |
|                      | Azithromycin                  | 0.0 (0)                  | 0.0 (0)                  | 0.7 (1)                   | 0.0 (0)                  |

|             |                      |                               |                          |                          |                           |                          |
|-------------|----------------------|-------------------------------|--------------------------|--------------------------|---------------------------|--------------------------|
|             |                      | Clarithromycin                | 0.0 (0)                  | 0.0 (0)                  | 0.0 (0)                   | 0.0 (0)                  |
|             |                      | Erythromycin                  | 2.8 (1)                  | 0.0 (0)                  | 2.8 (4)                   | 1.2 (1)                  |
|             | Aminoglycosides      | Roxithromycin                 | 0.0 (0)                  | 0.0 (0)                  | 0.0 (0)                   | 0.0 (0)                  |
|             |                      | Amikacin                      | 0.0 (0)                  | 0.0 (0)                  | 0.0 (0)                   | 0.0 (0)                  |
|             |                      | Gentamicin                    | 13.9 (5)                 | 18.6 (4)                 | 3.5 (5)                   | 4.8 (4)                  |
|             | Other antibiotics    | Tobramycin                    | 0.0 (0)                  | 0.0 (0)                  | 0.0 (0)                   | 0.0 (0)                  |
|             |                      | Bacitracin                    | 0.0 (0)                  | 0.0 (0)                  | 0.0 (0)                   | 0.0 (0)                  |
|             |                      | Benzalkonium chloride         | 0.0 (0)                  | 0.0 (0)                  | 0.0 (0)                   | 0.0 (0)                  |
|             |                      | Chloramphenicol               | 0.0 (0)                  | 0.0 (0)                  | 0.0 (0)                   | 0.0 (0)                  |
|             |                      | Ciprofloxacin                 | 0.0 (0)                  | 0.0 (0)                  | 0.0 (0)                   | 0.0 (0)                  |
|             |                      | Clindamycin                   | 0.0 (0)                  | 0.0 (0)                  | 0.0 (0)                   | 0.0 (0)                  |
|             |                      | Doxycycline                   | 0.0 (0)                  | 0.0 (0)                  | 0.0 (0)                   | 0.0 (0)                  |
|             |                      | Ertapenem                     | 0.0 (0)                  | 0.0 (0)                  | 0.0 (0)                   | 0.0 (0)                  |
|             |                      | Ethambutol                    | 0.0 (0)                  | 0.0 (0)                  | 0.0 (0)                   | 0.0 (0)                  |
|             |                      | Fosfomycin                    | 0.0 (0)                  | 0.0 (0)                  | 0.0 (0)                   | 0.0 (0)                  |
|             |                      | Hexamine                      | 0.0 (0)                  | 0.0 (0)                  | 0.0 (0)                   | 0.0 (0)                  |
|             |                      | Isoniazid                     | 0.0 (0)                  | 0.0 (0)                  | 0.0 (0)                   | 0.0 (0)                  |
|             |                      | Levofloxacin                  | 0.0 (0)                  | 0.0 (0)                  | 0.0 (0)                   | 0.0 (0)                  |
|             |                      | Linezolid                     | 0.0 (0)                  | 0.0 (0)                  | 0.0 (0)                   | 0.0 (0)                  |
|             |                      | Meropenem                     | 0.0 (0)                  | 0.0 (0)                  | 0.0 (0)                   | 0.0 (0)                  |
|             |                      | Metronidazole                 | 0.0 (0)                  | 0.0 (0)                  | 0.0 (0)                   | 0.0 (0)                  |
|             |                      | Minocycline                   | 0.0 (0)                  | 0.0 (0)                  | 0.0 (0)                   | 0.0 (0)                  |
|             |                      | Moxifloxacin                  | 0.0 (0)                  | 0.0 (0)                  | 0.0 (0)                   | 0.0 (0)                  |
|             |                      | Nitrofurantoin                | 0.0 (0)                  | 0.0 (0)                  | 0.0 (0)                   | 0.0 (0)                  |
|             |                      | Polymyxin                     | 0.0 (0)                  | 0.0 (0)                  | 0.0 (0)                   | 0.0 (0)                  |
|             |                      | Pyrazinamide                  | 0.0 (0)                  | 0.0 (0)                  | 0.0 (0)                   | 0.0 (0)                  |
|             |                      | Rifampicin                    | 0.0 (0)                  | 0.0 (0)                  | 0.0 (0)                   | 0.0 (0)                  |
|             |                      | Trimethoprim-sulfamethoxazole | 2.8 (1)                  | 0.0 (0)                  | 2.1 (3)                   | 1.2 (1)                  |
|             |                      | Vancomycin                    | 0.0 (0)                  | 0.0 (0)                  | 0.0 (0)                   | 0.0 (0)                  |
|             | Antivirals           | Unknown antibiotic            | 0.0 (0)                  | 0.0 (0)                  | 0.0 (0)                   | 0.0 (0)                  |
|             |                      | Abacavir                      | 0.0 (0)                  | 0.0 (0)                  | 0.0 (0)                   | 0.0 (0)                  |
|             |                      | Aciclovir                     | 2.8 (1)                  | 0.0 (0)                  | 0.7 (1)                   | 0.0 (0)                  |
|             |                      | Amantadine                    | 0.0 (0)                  | 0.0 (0)                  | 0.0 (0)                   | 0.0 (0)                  |
|             |                      | Efavirenz                     | 0.0 (0)                  | 0.0 (0)                  | 0.0 (0)                   | 0.0 (0)                  |
|             |                      | Emtricitabine                 | 0.0 (0)                  | 0.0 (0)                  | 0.0 (0)                   | 0.0 (0)                  |
|             |                      | Ganciclovir                   | 0.0 (0)                  | 0.0 (0)                  | 0.0 (0)                   | 0.0 (0)                  |
|             |                      | Lamivudine                    | 0.0 (0)                  | 0.0 (0)                  | 0.0 (0)                   | 0.0 (0)                  |
|             |                      | Lopinavir                     | 0.0 (0)                  | 0.0 (0)                  | 0.0 (0)                   | 0.0 (0)                  |
|             |                      | Nevirapine                    | 0.0 (0)                  | 0.0 (0)                  | 0.0 (0)                   | 0.0 (0)                  |
|             |                      | Oseltamivir                   | 0.0 (0)                  | 0.0 (0)                  | 0.0 (0)                   | 1.2 (1)                  |
|             |                      | Tenofovir                     | 0.0 (0)                  | 0.0 (0)                  | 0.0 (0)                   | 0.0 (0)                  |
|             |                      | Valaciclovir                  | 0.0 (0)                  | 0.0 (0)                  | 0.0 (0)                   | 0.0 (0)                  |
|             | Antifungals          | Zidovudine                    | 0.0 (0)                  | 0.0 (0)                  | 0.0 (0)                   | 0.0 (0)                  |
|             |                      | Fluconazole                   | 0.0 (0)                  | 0.0 (0)                  | 0.0 (0)                   | 0.0 (0)                  |
|             |                      | Itraconazole                  | 0.0 (0)                  | 0.0 (0)                  | 0.0 (0)                   | 0.0 (0)                  |
|             |                      | Ketoconazole                  | 0.0 (0)                  | 0.0 (0)                  | 0.0 (0)                   | 0.0 (0)                  |
|             |                      | Miconazole                    | 0.0 (0)                  | 0.0 (0)                  | 0.0 (0)                   | 0.0 (0)                  |
|             |                      | Nystatin                      | 13.9 (5)                 | 37.2 (8)                 | 4.2 (6)                   | 9.5 (8)                  |
|             | Other antimicrobials | Unknown antifungal            | 0.0 (0)                  | 0.0 (0)                  | 0.0 (0)                   | 0.0 (0)                  |
|             |                      | Ornidazole                    | 0.0 (0)                  | 0.0 (0)                  | 0.0 (0)                   | 0.0 (0)                  |
| Philippines |                      |                               | <i>42.1 person-years</i> | <i>21.8 person-years</i> | <i>173.5 person-years</i> | <i>89.4 person-years</i> |
|             | Antibiotics          |                               |                          |                          |                           |                          |
|             |                      | Penicillins                   |                          |                          |                           |                          |
|             |                      | Amoxicillin                   | 97.4 (41)                | 73.4 (16)                | 99.7 (173)                | 85.0 (76)                |
|             |                      | Ampicillin                    | 52.3 (22)                | 41.3 (9)                 | 15.6 (27)                 | 16.8 (15)                |
|             |                      | Cloxacillin                   | 0.0 (0)                  | 4.6 (1)                  | 4.6 (8)                   | 5.6 (5)                  |
|             |                      | Dicloxacillin                 | 0.0 (0)                  | 0.0 (0)                  | 0.0 (0)                   | 0.0 (0)                  |
|             |                      | Floxacillin                   | 0.0 (0)                  | 0.0 (0)                  | 0.0 (0)                   | 0.0 (0)                  |
|             |                      | Oxacillin                     | 2.4 (1)                  | 0.0 (0)                  | 1.7 (3)                   | 0.0 (0)                  |
|             |                      | Penicillin                    | 0.0 (0)                  | 0.0 (0)                  | 4.0 (7)                   | 0.0 (0)                  |
|             |                      | Piperacillin                  | 0.0 (0)                  | 0.0 (0)                  | 0.0 (0)                   | 0.0 (0)                  |
|             |                      | Cephalosporins (I)            |                          |                          |                           |                          |
|             |                      | Cefadroxil                    | 0.0 (0)                  | 0.0 (0)                  | 0.0 (0)                   | 0.0 (0)                  |
|             |                      | Cefalexin                     | 9.5 (4)                  | 18.4 (4)                 | 11.5 (20)                 | 17.9 (16)                |
|             |                      | Cefalotin                     | 0.0 (0)                  | 0.0 (0)                  | 0.0 (0)                   | 0.0 (0)                  |
|             |                      | Cefazolin                     | 0.0 (0)                  | 0.0 (0)                  | 0.0 (0)                   | 0.0 (0)                  |
|             |                      | Cefradine                     | 0.0 (0)                  | 0.0 (0)                  | 0.0 (0)                   | 0.0 (0)                  |

|                      |                               |           |           |           |           |
|----------------------|-------------------------------|-----------|-----------|-----------|-----------|
|                      | Cephalosporins (II)           |           |           |           |           |
|                      | Cefaclor                      | 2.4 (1)   | 0.0 (0)   | 4.0 (7)   | 3.4 (3)   |
|                      | Cefoxitin                     | 0.0 (0)   | 0.0 (0)   | 0.0 (0)   | 0.0 (0)   |
|                      | Cefprozil                     | 0.0 (0)   | 0.0 (0)   | 0.0 (0)   | 0.0 (0)   |
|                      | Cefuroxime axetil             | 4.8 (2)   | 4.6 (1)   | 7.5 (13)  | 8.9 (8)   |
|                      | Cephalosporins (III or IV)    |           |           |           |           |
|                      | Cefdinir                      | 0.0 (0)   | 0.0 (0)   | 0.0 (0)   | 0.0 (0)   |
|                      | Cefditoren                    | 0.0 (0)   | 0.0 (0)   | 0.0 (0)   | 0.0 (0)   |
|                      | Cefepime                      | 2.4 (1)   | 0.0 (0)   | 0.6 (1)   | 0.0 (0)   |
|                      | Cefixime                      | 11.9 (5)  | 18.4 (4)  | 9.8 (17)  | 14.5 (13) |
|                      | Cefotaxime                    | 54.7 (23) | 59.7 (13) | 13.3 (23) | 14.5 (13) |
|                      | Cefpodoxime                   | 0.0 (0)   | 0.0 (0)   | 0.0 (0)   | 0.0 (0)   |
|                      | Ceftazidime                   | 2.4 (1)   | 0.0 (0)   | 0.6 (1)   | 0.0 (0)   |
|                      | Ceftibuten                    | 0.0 (0)   | 0.0 (0)   | 0.0 (0)   | 0.0 (0)   |
|                      | Ceftriaxone                   | 2.4 (1)   | 0.0 (0)   | 2.3 (4)   | 4.5 (4)   |
|                      | Macrolides                    |           |           |           |           |
|                      | Azithromycin                  | 0.0 (0)   | 4.6 (1)   | 3.5 (6)   | 4.5 (4)   |
|                      | Clarithromycin                | 9.5 (4)   | 18.4 (4)  | 50.1 (87) | 29.1 (26) |
|                      | Erythromycin                  | 2.4 (1)   | 0.0 (0)   | 0.6 (1)   | 0.0 (0)   |
|                      | Roxithromycin                 | 0.0 (0)   | 0.0 (0)   | 0.0 (0)   | 0.0 (0)   |
|                      | Aminoglycosides               |           |           |           |           |
|                      | Amikacin                      | 87.9 (37) | 91.8 (20) | 23.1 (40) | 23.5 (21) |
|                      | Gentamicin                    | 4.8 (2)   | 0.0 (0)   | 1.7 (3)   | 0.0 (0)   |
|                      | Tobramycin                    | 0.0 (0)   | 0.0 (0)   | 0.0 (0)   | 0.0 (0)   |
|                      | Other antibiotics             |           |           |           |           |
|                      | Bacitracin                    | 0.0 (0)   | 0.0 (0)   | 0.0 (0)   | 0.0 (0)   |
|                      | Benzalkonium chloride         | 0.0 (0)   | 0.0 (0)   | 0.0 (0)   | 0.0 (0)   |
|                      | Chloramphenicol               | 0.0 (0)   | 0.0 (0)   | 0.6 (1)   | 0.0 (0)   |
|                      | Ciprofloxacin                 | 2.4 (1)   | 0.0 (0)   | 0.6 (1)   | 0.0 (0)   |
|                      | Clindamycin                   | 0.0 (0)   | 0.0 (0)   | 0.0 (0)   | 0.0 (0)   |
|                      | Doxycycline                   | 0.0 (0)   | 0.0 (0)   | 0.0 (0)   | 0.0 (0)   |
|                      | Ertapenem                     | 0.0 (0)   | 0.0 (0)   | 0.0 (0)   | 0.0 (0)   |
|                      | Ethambutol                    | 0.0 (0)   | 0.0 (0)   | 0.0 (0)   | 0.0 (0)   |
|                      | Fosfomicin                    | 0.0 (0)   | 0.0 (0)   | 0.0 (0)   | 0.0 (0)   |
|                      | Hexamine                      | 0.0 (0)   | 0.0 (0)   | 0.0 (0)   | 0.0 (0)   |
|                      | Isoniazid                     | 0.0 (0)   | 0.0 (0)   | 0.0 (0)   | 0.0 (0)   |
|                      | Levofloxacin                  | 0.0 (0)   | 0.0 (0)   | 0.0 (0)   | 0.0 (0)   |
|                      | Linezolid                     | 0.0 (0)   | 0.0 (0)   | 0.0 (0)   | 0.0 (0)   |
|                      | Meropenem                     | 4.8 (2)   | 0.0 (0)   | 3.5 (6)   | 0.0 (0)   |
|                      | Metronidazole                 | 2.4 (1)   | 0.0 (0)   | 2.3 (4)   | 2.2 (2)   |
|                      | Minocycline                   | 0.0 (0)   | 0.0 (0)   | 0.0 (0)   | 0.0 (0)   |
|                      | Moxifloxacin                  | 0.0 (0)   | 0.0 (0)   | 0.0 (0)   | 0.0 (0)   |
|                      | Nitrofurantoin                | 0.0 (0)   | 0.0 (0)   | 0.0 (0)   | 0.0 (0)   |
|                      | Polymyxin                     | 0.0 (0)   | 0.0 (0)   | 0.0 (0)   | 0.0 (0)   |
|                      | Pyrazinamide                  | 0.0 (0)   | 0.0 (0)   | 0.0 (0)   | 0.0 (0)   |
|                      | Rifampicin                    | 2.4 (1)   | 0.0 (0)   | 0.6 (1)   | 0.0 (0)   |
|                      | Trimethoprim-sulfamethoxazole | 0.0 (0)   | 0.0 (0)   | 1.7 (3)   | 2.2 (2)   |
|                      | Vancomycin                    | 0.0 (0)   | 0.0 (0)   | 0.0 (0)   | 0.0 (0)   |
|                      | Unknown antibiotic            | 0.0 (0)   | 0.0 (0)   | 0.0 (0)   | 0.0 (0)   |
| Antivirals           |                               |           |           |           |           |
|                      | Abacavir                      | 0.0 (0)   | 0.0 (0)   | 0.0 (0)   | 0.0 (0)   |
|                      | Aciclovir                     | 2.4 (1)   | 0.0 (0)   | 0.6 (1)   | 0.0 (0)   |
|                      | Amantadine                    | 0.0 (0)   | 0.0 (0)   | 0.0 (0)   | 0.0 (0)   |
|                      | Efavirenz                     | 0.0 (0)   | 0.0 (0)   | 0.0 (0)   | 0.0 (0)   |
|                      | Emtricitabine                 | 0.0 (0)   | 0.0 (0)   | 0.0 (0)   | 0.0 (0)   |
|                      | Ganciclovir                   | 0.0 (0)   | 0.0 (0)   | 0.0 (0)   | 0.0 (0)   |
|                      | Lamivudine                    | 0.0 (0)   | 0.0 (0)   | 0.0 (0)   | 0.0 (0)   |
|                      | Lopinavir                     | 0.0 (0)   | 0.0 (0)   | 0.0 (0)   | 0.0 (0)   |
|                      | Nevirapine                    | 0.0 (0)   | 0.0 (0)   | 0.0 (0)   | 0.0 (0)   |
|                      | Oseltamivir                   | 0.0 (0)   | 0.0 (0)   | 0.0 (0)   | 0.0 (0)   |
|                      | Tenofovir                     | 0.0 (0)   | 0.0 (0)   | 0.0 (0)   | 0.0 (0)   |
|                      | Valaciclovir                  | 0.0 (0)   | 0.0 (0)   | 0.0 (0)   | 0.0 (0)   |
|                      | Zidovudine                    | 0.0 (0)   | 0.0 (0)   | 0.0 (0)   | 0.0 (0)   |
| Antifungals          |                               |           |           |           |           |
|                      | Fluconazole                   | 0.0 (0)   | 0.0 (0)   | 0.0 (0)   | 0.0 (0)   |
|                      | Itraconazole                  | 0.0 (0)   | 0.0 (0)   | 0.0 (0)   | 0.0 (0)   |
|                      | Ketoconazole                  | 0.0 (0)   | 0.0 (0)   | 0.0 (0)   | 0.0 (0)   |
|                      | Miconazole                    | 0.0 (0)   | 0.0 (0)   | 0.0 (0)   | 0.0 (0)   |
|                      | Nystatin                      | 0.0 (0)   | 0.0 (0)   | 0.6 (1)   | 0.0 (0)   |
|                      | Unknown antifungal            | 0.0 (0)   | 0.0 (0)   | 0.0 (0)   | 0.0 (0)   |
| Other antimicrobials |                               |           |           |           |           |
|                      | Ornidazole                    | 0.0 (0)   | 0.0 (0)   | 0.0 (0)   | 0.0 (0)   |



|                            |                               | 5.2 person-years | 2.7 person-years | 21.4 person-years | 10.8 person-years |
|----------------------------|-------------------------------|------------------|------------------|-------------------|-------------------|
| Antibiotics                |                               |                  |                  |                   |                   |
| Penicillins                |                               |                  |                  |                   |                   |
|                            | Amoxicillin                   | 0.0 (0)          | 0.0 (0)          | 0.0 (0)           | 18.4 (2)          |
|                            | Ampicillin                    | 0.0 (0)          | 0.0 (0)          | 0.0 (0)           | 0.0 (0)           |
|                            | Cloxacillin                   | 0.0 (0)          | 0.0 (0)          | 0.0 (0)           | 0.0 (0)           |
|                            | Dicloxacillin                 | 0.0 (0)          | 0.0 (0)          | 0.0 (0)           | 0.0 (0)           |
|                            | Floxacillin                   | 19.3 (1)         | 0.0 (0)          | 4.7 (1)           | 9.2 (1)           |
|                            | Oxacillin                     | 0.0 (0)          | 0.0 (0)          | 0.0 (0)           | 0.0 (0)           |
|                            | Penicillin                    | 38.7 (2)         | 36.9 (1)         | 9.4 (2)           | 9.2 (1)           |
|                            | Piperacillin                  | 0.0 (0)          | 0.0 (0)          | 0.0 (0)           | 0.0 (0)           |
| Cephalosporins (I)         |                               |                  |                  |                   |                   |
|                            | Cefadroxil                    | 0.0 (0)          | 0.0 (0)          | 0.0 (0)           | 0.0 (0)           |
|                            | Cefalexin                     | 0.0 (0)          | 0.0 (0)          | 0.0 (0)           | 0.0 (0)           |
|                            | Cefalotin                     | 0.0 (0)          | 0.0 (0)          | 0.0 (0)           | 0.0 (0)           |
|                            | Cefazolin                     | 0.0 (0)          | 0.0 (0)          | 0.0 (0)           | 0.0 (0)           |
|                            | Cefradine                     | 0.0 (0)          | 0.0 (0)          | 0.0 (0)           | 0.0 (0)           |
| Cephalosporins (II)        |                               |                  |                  |                   |                   |
|                            | Cefaclor                      | 0.0 (0)          | 0.0 (0)          | 0.0 (0)           | 0.0 (0)           |
|                            | Cefoxitin                     | 0.0 (0)          | 0.0 (0)          | 0.0 (0)           | 0.0 (0)           |
|                            | Cefprozil                     | 0.0 (0)          | 0.0 (0)          | 0.0 (0)           | 0.0 (0)           |
|                            | Cefuroxime axetil             | 0.0 (0)          | 0.0 (0)          | 0.0 (0)           | 0.0 (0)           |
| Cephalosporins (III or IV) |                               |                  |                  |                   |                   |
|                            | Cefdinir                      | 0.0 (0)          | 0.0 (0)          | 0.0 (0)           | 0.0 (0)           |
|                            | Cefditoren                    | 0.0 (0)          | 0.0 (0)          | 0.0 (0)           | 0.0 (0)           |
|                            | Cefepime                      | 0.0 (0)          | 0.0 (0)          | 0.0 (0)           | 0.0 (0)           |
|                            | Cefixime                      | 0.0 (0)          | 0.0 (0)          | 0.0 (0)           | 0.0 (0)           |
|                            | Cefotaxime                    | 0.0 (0)          | 36.9 (1)         | 0.0 (0)           | 9.2 (1)           |
|                            | Cefpodoxime                   | 0.0 (0)          | 0.0 (0)          | 0.0 (0)           | 0.0 (0)           |
|                            | Ceftazidime                   | 0.0 (0)          | 0.0 (0)          | 0.0 (0)           | 0.0 (0)           |
|                            | Ceftibuten                    | 0.0 (0)          | 0.0 (0)          | 0.0 (0)           | 0.0 (0)           |
|                            | Ceftriaxone                   | 19.3 (1)         | 0.0 (0)          | 9.4 (2)           | 0.0 (0)           |
| Macrolides                 |                               |                  |                  |                   |                   |
|                            | Azithromycin                  | 0.0 (0)          | 0.0 (0)          | 4.7 (1)           | 0.0 (0)           |
|                            | Clarithromycin                | 0.0 (0)          | 0.0 (0)          | 0.0 (0)           | 0.0 (0)           |
|                            | Erythromycin                  | 0.0 (0)          | 0.0 (0)          | 0.0 (0)           | 0.0 (0)           |
|                            | Roxithromycin                 | 0.0 (0)          | 0.0 (0)          | 0.0 (0)           | 0.0 (0)           |
| Aminoglycosides            |                               |                  |                  |                   |                   |
|                            | Amikacin                      | 0.0 (0)          | 0.0 (0)          | 0.0 (0)           | 0.0 (0)           |
|                            | Gentamicin                    | 38.7 (2)         | 36.9 (1)         | 9.4 (2)           | 9.2 (1)           |
|                            | Tobramycin                    | 0.0 (0)          | 0.0 (0)          | 0.0 (0)           | 0.0 (0)           |
| Other antibiotics          |                               |                  |                  |                   |                   |
|                            | Bacitracin                    | 0.0 (0)          | 0.0 (0)          | 0.0 (0)           | 0.0 (0)           |
|                            | Benzalkonium chloride         | 0.0 (0)          | 0.0 (0)          | 0.0 (0)           | 0.0 (0)           |
|                            | Chloramphenicol               | 0.0 (0)          | 0.0 (0)          | 0.0 (0)           | 0.0 (0)           |
|                            | Ciprofloxacin                 | 0.0 (0)          | 0.0 (0)          | 0.0 (0)           | 0.0 (0)           |
|                            | Clindamycin                   | 0.0 (0)          | 0.0 (0)          | 0.0 (0)           | 0.0 (0)           |
|                            | Doxycycline                   | 0.0 (0)          | 0.0 (0)          | 0.0 (0)           | 0.0 (0)           |
|                            | Ertapenem                     | 0.0 (0)          | 0.0 (0)          | 0.0 (0)           | 0.0 (0)           |
|                            | Ethambutol                    | 0.0 (0)          | 0.0 (0)          | 0.0 (0)           | 0.0 (0)           |
|                            | Fosfomycin                    | 0.0 (0)          | 0.0 (0)          | 0.0 (0)           | 0.0 (0)           |
|                            | Hexamine                      | 0.0 (0)          | 0.0 (0)          | 0.0 (0)           | 0.0 (0)           |
|                            | Isoniazid                     | 0.0 (0)          | 0.0 (0)          | 0.0 (0)           | 0.0 (0)           |
|                            | Levofloxacin                  | 0.0 (0)          | 0.0 (0)          | 0.0 (0)           | 0.0 (0)           |
|                            | Linezolid                     | 0.0 (0)          | 0.0 (0)          | 0.0 (0)           | 0.0 (0)           |
|                            | Meropenem                     | 0.0 (0)          | 0.0 (0)          | 0.0 (0)           | 0.0 (0)           |
|                            | Metronidazole                 | 0.0 (0)          | 0.0 (0)          | 0.0 (0)           | 0.0 (0)           |
|                            | Minocycline                   | 0.0 (0)          | 0.0 (0)          | 0.0 (0)           | 0.0 (0)           |
|                            | Moxifloxacin                  | 0.0 (0)          | 0.0 (0)          | 0.0 (0)           | 0.0 (0)           |
|                            | Nitrofurantoin                | 0.0 (0)          | 0.0 (0)          | 0.0 (0)           | 0.0 (0)           |
|                            | Polymyxin                     | 0.0 (0)          | 0.0 (0)          | 0.0 (0)           | 0.0 (0)           |
|                            | Pyrazinamide                  | 0.0 (0)          | 0.0 (0)          | 0.0 (0)           | 0.0 (0)           |
|                            | Rifampicin                    | 0.0 (0)          | 0.0 (0)          | 0.0 (0)           | 0.0 (0)           |
|                            | Trimethoprim-sulfamethoxazole | 0.0 (0)          | 0.0 (0)          | 0.0 (0)           | 0.0 (0)           |
|                            | Vancomycin                    | 0.0 (0)          | 0.0 (0)          | 0.0 (0)           | 0.0 (0)           |
|                            | Unknown antibiotic            | 0.0 (0)          | 0.0 (0)          | 0.0 (0)           | 0.0 (0)           |
| Antivirals                 |                               |                  |                  |                   |                   |
|                            | Abacavir                      | 0.0 (0)          | 0.0 (0)          | 0.0 (0)           | 0.0 (0)           |
|                            | Aciclovir                     | 0.0 (0)          | 36.9 (1)         | 0.0 (0)           | 9.2 (1)           |
|                            | Amantadine                    | 0.0 (0)          | 0.0 (0)          | 0.0 (0)           | 0.0 (0)           |
|                            | Efavirenz                     | 0.0 (0)          | 0.0 (0)          | 0.0 (0)           | 0.0 (0)           |

|               |                            |               |              |                          |                           |                           |
|---------------|----------------------------|---------------|--------------|--------------------------|---------------------------|---------------------------|
| United States | Antifungals                | Emtricitabine | 0.0 (0)      | 0.0 (0)                  | 0.0 (0)                   | 0.0 (0)                   |
|               |                            | Ganciclovir   | 0.0 (0)      | 0.0 (0)                  | 0.0 (0)                   | 0.0 (0)                   |
|               |                            | Lamivudine    | 0.0 (0)      | 0.0 (0)                  | 0.0 (0)                   | 0.0 (0)                   |
|               |                            | Lopinavir     | 0.0 (0)      | 0.0 (0)                  | 0.0 (0)                   | 0.0 (0)                   |
|               |                            | Nevirapine    | 0.0 (0)      | 0.0 (0)                  | 0.0 (0)                   | 0.0 (0)                   |
|               |                            | Oseltamivir   | 0.0 (0)      | 0.0 (0)                  | 0.0 (0)                   | 0.0 (0)                   |
|               |                            | Tenofovir     | 0.0 (0)      | 0.0 (0)                  | 0.0 (0)                   | 0.0 (0)                   |
|               |                            | Valaciclovir  | 0.0 (0)      | 0.0 (0)                  | 0.0 (0)                   | 0.0 (0)                   |
|               |                            | Zidovudine    | 0.0 (0)      | 0.0 (0)                  | 0.0 (0)                   | 0.0 (0)                   |
|               |                            | Fluconazole   | 0.0 (0)      | 0.0 (0)                  | 0.0 (0)                   | 0.0 (0)                   |
|               |                            | Itraconazole  | 0.0 (0)      | 0.0 (0)                  | 0.0 (0)                   | 0.0 (0)                   |
|               |                            | Ketoconazole  | 0.0 (0)      | 0.0 (0)                  | 0.0 (0)                   | 0.0 (0)                   |
|               |                            | Miconazole    | 0.0 (0)      | 0.0 (0)                  | 0.0 (0)                   | 0.0 (0)                   |
|               |                            | Nystatin      | 0.0 (0)      | 0.0 (0)                  | 0.0 (0)                   | 0.0 (0)                   |
|               | Unknown antifungal         | 0.0 (0)       | 0.0 (0)      | 0.0 (0)                  | 0.0 (0)                   |                           |
|               | Other antimicrobials       | Ornidazole    | 0.0 (0)      | 0.0 (0)                  | 0.0 (0)                   | 0.0 (0)                   |
|               | Antibiotics                |               | <i>172.0</i> | <i>89.6 person-years</i> | <i>674.8 person-years</i> | <i>349.1 person-years</i> |
|               |                            | Penicillins   |              |                          |                           |                           |
|               |                            | Amoxicillin   | 7.6 (13)     | 15.6 (14)                | 32.6 (220)                | 37.8 (132)                |
|               |                            | Ampicillin    | 12.2 (21)    | 19.0 (17)                | 3.3 (22)                  | 4.9 (17)                  |
|               |                            | Cloxacillin   | 0.0 (0)      | 0.0 (0)                  | 0.0 (0)                   | 0.0 (0)                   |
|               |                            | Dicloxacillin | 0.0 (0)      | 0.0 (0)                  | 0.0 (0)                   | 0.0 (0)                   |
|               |                            | Floxacillin   | 0.0 (0)      | 0.0 (0)                  | 0.0 (0)                   | 0.0 (0)                   |
|               |                            | Oxacillin     | 0.0 (0)      | 0.0 (0)                  | 0.0 (0)                   | 0.0 (0)                   |
|               |                            | Penicillin    | 0.0 (0)      | 0.0 (0)                  | 0.1 (1)                   | 0.3 (1)                   |
|               | Piperacillin               | 0.0 (0)       | 0.0 (0)      | 0.0 (0)                  | 0.0 (0)                   |                           |
|               | Cephalosporins (I)         |               |              |                          |                           |                           |
|               | Cefadroxil                 | 0.0 (0)       | 0.0 (0)      | 0.0 (0)                  | 0.0 (0)                   |                           |
|               | Cefalexin                  | 2.3 (4)       | 0.0 (0)      | 1.8 (12)                 | 1.4 (5)                   |                           |
|               | Cefalotin                  | 0.0 (0)       | 0.0 (0)      | 0.0 (0)                  | 0.0 (0)                   |                           |
|               | Cefazolin                  | 0.6 (1)       | 0.0 (0)      | 0.4 (3)                  | 0.0 (0)                   |                           |
|               | Cefradine                  | 0.0 (0)       | 0.0 (0)      | 0.0 (0)                  | 0.0 (0)                   |                           |
|               | Cephalosporins (II)        |               |              |                          |                           |                           |
|               | Cefaclor                   | 0.0 (0)       | 0.0 (0)      | 0.0 (0)                  | 0.0 (0)                   |                           |
|               | Cefoxitin                  | 0.0 (0)       | 0.0 (0)      | 0.0 (0)                  | 0.0 (0)                   |                           |
|               | Cefprozil                  | 0.0 (0)       | 0.0 (0)      | 0.4 (3)                  | 0.3 (1)                   |                           |
|               | Cefuroxime axetil          | 0.0 (0)       | 0.0 (0)      | 0.0 (0)                  | 0.0 (0)                   |                           |
|               | Cephalosporins (III or IV) |               |              |                          |                           |                           |
|               | Cefdinir                   | 1.2 (2)       | 2.2 (2)      | 9.0 (61)                 | 9.5 (33)                  |                           |
|               | Cefditoren                 | 0.0 (0)       | 0.0 (0)      | 0.0 (0)                  | 0.0 (0)                   |                           |
|               | Cefepime                   | 0.0 (0)       | 0.0 (0)      | 0.0 (0)                  | 0.0 (0)                   |                           |
|               | Cefixime                   | 0.0 (0)       | 0.0 (0)      | 0.1 (1)                  | 0.0 (0)                   |                           |
|               | Cefotaxime                 | 1.2 (2)       | 2.2 (2)      | 0.3 (2)                  | 0.6 (2)                   |                           |
|               | Cefpodoxime                | 0.0 (0)       | 0.0 (0)      | 0.0 (0)                  | 0.0 (0)                   |                           |
|               | Ceftazidime                | 0.0 (0)       | 0.0 (0)      | 0.0 (0)                  | 0.0 (0)                   |                           |
|               | Ceftibuten                 | 0.0 (0)       | 0.0 (0)      | 0.0 (0)                  | 0.0 (0)                   |                           |
|               | Ceftriaxone                | 4.1 (7)       | 6.7 (6)      | 3.7 (25)                 | 4.0 (14)                  |                           |
|               | Macrolides                 |               |              |                          |                           |                           |
|               | Azithromycin               | 4.7 (8)       | 4.5 (4)      | 4.1 (28)                 | 4.0 (14)                  |                           |
|               | Clarithromycin             | 0.0 (0)       | 0.0 (0)      | 0.0 (0)                  | 0.0 (0)                   |                           |
|               | Erythromycin               | 1.7 (3)       | 1.1 (1)      | 0.6 (4)                  | 0.3 (1)                   |                           |
|               | Roxithromycin              | 0.0 (0)       | 0.0 (0)      | 0.0 (0)                  | 0.0 (0)                   |                           |
|               | Aminoglycosides            |               |              |                          |                           |                           |
|               | Amikacin                   | 0.0 (0)       | 1.1 (1)      | 0.0 (0)                  | 0.3 (1)                   |                           |
|               | Gentamicin                 | 11.0 (19)     | 12.3 (11)    | 2.8 (19)                 | 3.2 (11)                  |                           |
|               | Tobramycin                 | 0.0 (0)       | 0.0 (0)      | 0.1 (1)                  | 0.3 (1)                   |                           |
|               | Other antibiotics          |               |              |                          |                           |                           |
|               | Bacitracin                 | 0.0 (0)       | 0.0 (0)      | 0.3 (2)                  | 0.0 (0)                   |                           |
|               | Benzalkonium chloride      | 0.0 (0)       | 0.0 (0)      | 0.0 (0)                  | 0.0 (0)                   |                           |
|               | Chloramphenicol            | 0.0 (0)       | 0.0 (0)      | 0.0 (0)                  | 0.0 (0)                   |                           |
|               | Ciprofloxacin              | 0.0 (0)       | 0.0 (0)      | 0.0 (0)                  | 0.0 (0)                   |                           |
|               | Clindamycin                | 0.6 (1)       | 2.2 (2)      | 0.6 (4)                  | 1.1 (4)                   |                           |
|               | Doxycycline                | 0.0 (0)       | 0.0 (0)      | 0.3 (2)                  | 0.0 (0)                   |                           |
|               | Ertapenem                  | 0.0 (0)       | 0.0 (0)      | 0.0 (0)                  | 0.0 (0)                   |                           |
|               | Ethambutol                 | 0.0 (0)       | 0.0 (0)      | 0.0 (0)                  | 0.0 (0)                   |                           |
|               | Fosfomycin                 | 0.0 (0)       | 0.0 (0)      | 0.0 (0)                  | 0.0 (0)                   |                           |
|               | Hexamine                   | 0.0 (0)       | 0.0 (0)      | 0.0 (0)                  | 0.0 (0)                   |                           |
|               | Isoniazid                  | 0.0 (0)       | 0.0 (0)      | 0.1 (1)                  | 0.0 (0)                   |                           |

|                      |                               |              |                    |              |              |
|----------------------|-------------------------------|--------------|--------------------|--------------|--------------|
|                      | Levofloxacin                  | 0.0 (0)      | 0.0 (0)            | 0.1 (1)      | 0.0 (0)      |
|                      | Linezolid                     | 0.0 (0)      | 0.0 (0)            | 0.0 (0)      | 0.0 (0)      |
|                      | Meropenem                     | 0.0 (0)      | 0.0 (0)            | 0.0 (0)      | 0.0 (0)      |
|                      | Metronidazole                 | 0.0 (0)      | 1.1 (1)            | 0.0 (0)      | 0.3 (1)      |
|                      | Minocycline                   | 0.0 (0)      | 0.0 (0)            | 0.0 (0)      | 0.0 (0)      |
|                      | Moxifloxacin                  | 0.0 (0)      | 0.0 (0)            | 0.1 (1)      | 0.0 (0)      |
|                      | Nitrofurantoin                | 0.0 (0)      | 0.0 (0)            | 0.0 (0)      | 0.0 (0)      |
|                      | Polymyxin                     | 0.0 (0)      | 0.0 (0)            | 0.1 (1)      | 0.0 (0)      |
|                      | Pyrazinamide                  | 0.0 (0)      | 0.0 (0)            | 0.0 (0)      | 0.0 (0)      |
|                      | Rifampicin                    | 0.0 (0)      | 0.0 (0)            | 0.0 (0)      | 0.0 (0)      |
|                      | Trimethoprim-sulfamethoxazole | 0.6 (1)      | 0.0 (0)            | 1.0 (7)      | 0.6 (2)      |
|                      | Vancomycin                    | 0.0 (0)      | 2.2 (2)            | 0.4 (3)      | 0.6 (2)      |
|                      | Unknown antibiotic            | 0.0 (0)      | 0.0 (0)            | 0.0 (0)      | 0.0 (0)      |
| Antivirals           | Abacavir                      | 0.0 (0)      | 0.0 (0)            | 0.0 (0)      | 0.0 (0)      |
|                      | Aciclovir                     | 0.6 (1)      | 0.0 (0)            | 0.1 (1)      | 0.0 (0)      |
|                      | Amantadine                    | 0.0 (0)      | 0.0 (0)            | 0.0 (0)      | 0.0 (0)      |
|                      | Efavirenz                     | 0.0 (0)      | 0.0 (0)            | 0.0 (0)      | 0.0 (0)      |
|                      | Emtricitabine                 | 0.0 (0)      | 0.0 (0)            | 0.0 (0)      | 0.0 (0)      |
|                      | Ganciclovir                   | 0.0 (0)      | 0.0 (0)            | 0.0 (0)      | 0.0 (0)      |
|                      | Lamivudine                    | 0.0 (0)      | 0.0 (0)            | 0.0 (0)      | 0.0 (0)      |
|                      | Lopinavir                     | 0.0 (0)      | 0.0 (0)            | 0.0 (0)      | 0.0 (0)      |
|                      | Nevirapine                    | 0.0 (0)      | 0.0 (0)            | 0.0 (0)      | 0.0 (0)      |
|                      | Oseltamivir                   | 8.7 (15)     | 2.2 (2)            | 4.7 (32)     | 2.6 (9)      |
|                      | Tenofovir                     | 0.0 (0)      | 0.0 (0)            | 0.0 (0)      | 0.0 (0)      |
|                      | Valaciclovir                  | 0.0 (0)      | 0.0 (0)            | 0.0 (0)      | 0.0 (0)      |
|                      | Zidovudine                    | 0.0 (0)      | 0.0 (0)            | 0.0 (0)      | 0.0 (0)      |
| Antifungals          | Fluconazole                   | 5.2 (9)      | 1.1 (1)            | 2.1 (14)     | 1.7 (6)      |
|                      | Itraconazole                  | 0.0 (0)      | 0.0 (0)            | 0.0 (0)      | 0.0 (0)      |
|                      | Ketoconazole                  | 0.0 (0)      | 0.0 (0)            | 0.0 (0)      | 0.0 (0)      |
|                      | Miconazole                    | 0.0 (0)      | 0.0 (0)            | 0.0 (0)      | 0.0 (0)      |
|                      | Nystatin                      | 1.7 (3)      | 4.5 (4)            | 0.7 (5)      | 1.4 (5)      |
|                      | Unknown antifungal            | 0.0 (0)      | 0.0 (0)            | 0.0 (0)      | 0.0 (0)      |
| Other antimicrobials | Ornidazole                    | 0.0 (0)      | 0.0 (0)            | 0.0 (0)      | 0.0 (0)      |
| South Africa         |                               | 384.4        | 195.1 person-years | 1533.7       | 775.4        |
|                      |                               | person-years |                    | person-years | person-years |
| Antibiotics          | Penicillins                   |              |                    |              |              |
|                      | Amoxicillin                   | 112.4 (432)  | 110.2 (215)        | 104.6 (1604) | 103.0 (799)  |
|                      | Ampicillin                    | 20.6 (79)    | 38.4 (75)          | 6.2 (95)     | 11.6 (90)    |
|                      | Cloxacillin                   | 1.8 (7)      | 2.1 (4)            | 0.5 (8)      | 1.0 (8)      |
|                      | Dicloxacillin                 | 0.0 (0)      | 0.0 (0)            | 0.0 (0)      | 0.0 (0)      |
|                      | Floxacillin                   | 0.5 (2)      | 0.0 (0)            | 0.3 (4)      | 0.0 (0)      |
|                      | Oxacillin                     | 0.0 (0)      | 0.0 (0)            | 0.0 (0)      | 0.0 (0)      |
|                      | Penicillin                    | 1.3 (5)      | 2.1 (4)            | 0.6 (9)      | 1.2 (9)      |
|                      | Piperacillin                  | 0.0 (0)      | 0.0 (0)            | 0.2 (3)      | 0.3 (2)      |
|                      | Cephalosporins (I)            |              |                    |              |              |
|                      | Cefadroxil                    | 0.0 (0)      | 0.0 (0)            | 0.1 (1)      | 0.0 (0)      |
|                      | Cefalexin                     | 3.4 (13)     | 2.1 (4)            | 1.7 (26)     | 1.9 (15)     |
|                      | Cefalotin                     | 0.0 (0)      | 0.0 (0)            | 0.0 (0)      | 0.0 (0)      |
|                      | Cefazolin                     | 0.0 (0)      | 0.0 (0)            | 0.1 (2)      | 0.1 (1)      |
|                      | Cefradine                     | 0.0 (0)      | 0.0 (0)            | 0.0 (0)      | 0.0 (0)      |
|                      | Cephalosporins (II)           |              |                    |              |              |
|                      | Cefaclor                      | 0.5 (2)      | 0.0 (0)            | 0.1 (2)      | 0.0 (0)      |
|                      | Cefoxitin                     | 0.0 (0)      | 0.0 (0)            | 0.0 (0)      | 0.0 (0)      |
|                      | Cefprozil                     | 0.0 (0)      | 0.0 (0)            | 0.0 (0)      | 0.0 (0)      |
|                      | Cefuroxime axetil             | 0.3 (1)      | 0.5 (1)            | 0.3 (5)      | 0.8 (6)      |
|                      | Cephalosporins (III or IV)    |              |                    |              |              |
|                      | Cefdinir                      | 0.0 (0)      | 0.0 (0)            | 0.0 (0)      | 0.0 (0)      |
|                      | Cefditoren                    | 0.0 (0)      | 0.0 (0)            | 0.0 (0)      | 0.0 (0)      |
|                      | Cefepime                      | 0.0 (0)      | 0.0 (0)            | 0.0 (0)      | 0.0 (0)      |
|                      | Cefixime                      | 0.0 (0)      | 0.0 (0)            | 0.0 (0)      | 0.0 (0)      |
|                      | Cefotaxime                    | 11.4 (44)    | 23.6 (46)          | 3.2 (49)     | 6.8 (53)     |
|                      | Cefpodoxime                   | 0.8 (3)      | 2.6 (5)            | 1.1 (17)     | 1.8 (14)     |
|                      | Ceftazidime                   | 0.3 (1)      | 0.5 (1)            | 0.1 (1)      | 0.1 (1)      |
|                      | Ceftibuten                    | 0.0 (0)      | 0.0 (0)            | 0.0 (0)      | 0.0 (0)      |
|                      | Ceftriaxone                   | 2.3 (9)      | 3.6 (7)            | 1.1 (17)     | 1.8 (14)     |
|                      | Macrolides                    |              |                    |              |              |
|                      | Azithromycin                  | 2.1 (8)      | 3.1 (6)            | 1.3 (20)     | 1.8 (14)     |
|                      | Clarithromycin                | 0.0 (0)      | 0.5 (1)            | 0.1 (1)      | 0.1 (1)      |

|                      |                               |           |           |          |          |
|----------------------|-------------------------------|-----------|-----------|----------|----------|
|                      | Erythromycin                  | 0.8 (3)   | 0.5 (1)   | 0.9 (14) | 0.3 (2)  |
|                      | Roxithromycin                 | 0.0 (0)   | 0.0 (0)   | 0.0 (0)  | 0.0 (0)  |
| Aminoglycosides      | Amikacin                      | 2.6 (10)  | 4.1 (8)   | 0.8 (13) | 1.5 (12) |
|                      | Gentamicin                    | 15.1 (58) | 26.7 (52) | 4.3 (66) | 7.9 (61) |
|                      | Tobramycin                    | 0.0 (0)   | 0.0 (0)   | 0.0 (0)  | 0.0 (0)  |
| Other antibiotics    | Bacitracin                    | 0.0 (0)   | 0.0 (0)   | 0.0 (0)  | 0.0 (0)  |
|                      | Benzalkonium chloride         | 0.0 (0)   | 0.0 (0)   | 0.0 (0)  | 0.0 (0)  |
|                      | Chloramphenicol               | 0.3 (1)   | 0.0 (0)   | 0.2 (3)  | 0.0 (0)  |
|                      | Ciprofloxacin                 | 0.3 (1)   | 0.0 (0)   | 0.2 (3)  | 0.8 (6)  |
|                      | Clindamycin                   | 0.0 (0)   | 0.0 (0)   | 0.0 (0)  | 0.0 (0)  |
|                      | Doxycycline                   | 0.0 (0)   | 0.0 (0)   | 0.0 (0)  | 0.0 (0)  |
|                      | Ertapenem                     | 0.3 (1)   | 0.0 (0)   | 0.3 (5)  | 0.0 (0)  |
|                      | Ethambutol                    | 0.0 (0)   | 0.0 (0)   | 0.1 (2)  | 0.6 (5)  |
|                      | Fosfomycin                    | 0.0 (0)   | 0.0 (0)   | 0.0 (0)  | 0.0 (0)  |
|                      | Hexamine                      | 0.0 (0)   | 0.0 (0)   | 0.0 (0)  | 0.0 (0)  |
|                      | Isoniazid                     | 0.3 (1)   | 1.0 (2)   | 1.0 (16) | 1.7 (13) |
|                      | Levofloxacin                  | 0.0 (0)   | 0.0 (0)   | 0.0 (0)  | 0.0 (0)  |
|                      | Linezolid                     | 0.0 (0)   | 0.0 (0)   | 0.0 (0)  | 0.0 (0)  |
|                      | Meropenem                     | 0.3 (1)   | 0.0 (0)   | 0.1 (1)  | 0.4 (3)  |
|                      | Metronidazole                 | 0.8 (3)   | 0.0 (0)   | 0.3 (5)  | 0.1 (1)  |
|                      | Minocycline                   | 0.0 (0)   | 0.0 (0)   | 0.0 (0)  | 0.0 (0)  |
|                      | Moxifloxacin                  | 0.0 (0)   | 0.0 (0)   | 0.0 (0)  | 0.0 (0)  |
|                      | Nitrofurantoin                | 0.0 (0)   | 0.0 (0)   | 0.0 (0)  | 0.0 (0)  |
|                      | Polymyxin                     | 0.0 (0)   | 0.0 (0)   | 0.0 (0)  | 0.0 (0)  |
|                      | Pyrazinamide                  | 0.3 (1)   | 0.0 (0)   | 0.5 (7)  | 1.3 (10) |
|                      | Rifampicin                    | 0.3 (1)   | 0.0 (0)   | 0.5 (8)  | 1.3 (10) |
|                      | Trimethoprim-sulfamethoxazole | 1.8 (7)   | 2.1 (4)   | 1.7 (26) | 1.5 (12) |
|                      | Vancomycin                    | 0.3 (1)   | 0.0 (0)   | 0.1 (1)  | 0.1 (1)  |
|                      | Unknown antibiotic            | 0.0 (0)   | 2.1 (4)   | 0.9 (14) | 1.4 (11) |
| Antivirals           | Abacavir                      | 0.3 (1)   | 0.0 (0)   | 0.1 (2)  | 0.0 (0)  |
|                      | Aciclovir                     | 0.0 (0)   | 0.0 (0)   | 0.1 (1)  | 0.0 (0)  |
|                      | Amantadine                    | 0.0 (0)   | 0.0 (0)   | 0.0 (0)  | 0.0 (0)  |
|                      | Efavirenz                     | 0.0 (0)   | 0.0 (0)   | 0.0 (0)  | 0.0 (0)  |
|                      | Emtricitabine                 | 0.0 (0)   | 0.0 (0)   | 0.0 (0)  | 0.0 (0)  |
|                      | Ganciclovir                   | 0.0 (0)   | 0.5 (1)   | 0.0 (0)  | 0.1 (1)  |
|                      | Lamivudine                    | 0.3 (1)   | 0.0 (0)   | 0.1 (2)  | 0.0 (0)  |
|                      | Lopinavir                     | 0.5 (2)   | 0.0 (0)   | 0.2 (3)  | 0.0 (0)  |
|                      | Nevirapine                    | 0.5 (2)   | 0.0 (0)   | 0.1 (2)  | 0.0 (0)  |
|                      | Oseltamivir                   | 0.0 (0)   | 0.0 (0)   | 0.1 (1)  | 0.0 (0)  |
|                      | Tenofovir                     | 0.0 (0)   | 0.0 (0)   | 0.0 (0)  | 0.0 (0)  |
|                      | Valaciclovir                  | 0.0 (0)   | 0.0 (0)   | 0.0 (0)  | 0.0 (0)  |
|                      | Zidovudine                    | 0.5 (2)   | 0.0 (0)   | 0.2 (3)  | 0.0 (0)  |
| Antifungals          | Fluconazole                   | 0.8 (3)   | 0.5 (1)   | 0.3 (5)  | 0.3 (2)  |
|                      | Itraconazole                  | 0.0 (0)   | 0.0 (0)   | 0.0 (0)  | 0.0 (0)  |
|                      | Ketoconazole                  | 0.0 (0)   | 0.0 (0)   | 0.0 (0)  | 0.0 (0)  |
|                      | Miconazole                    | 0.0 (0)   | 0.0 (0)   | 0.1 (1)  | 0.0 (0)  |
|                      | Nystatin                      | 1.6 (6)   | 3.6 (7)   | 1.2 (19) | 1.4 (11) |
|                      | Unknown antifungal            | 0.0 (0)   | 0.5 (1)   | 0.0 (0)  | 0.1 (1)  |
| Other antimicrobials | Ornidazole                    | 0.0 (0)   | 0.0 (0)   | 0.0 (0)  | 0.0 (0)  |

**Table S11: Antimicrobial prescribing among maternal participants.**

| Country   | Drug Class  | Subclass                   | Name                          | Follow-up observations                              |                                                        |
|-----------|-------------|----------------------------|-------------------------------|-----------------------------------------------------|--------------------------------------------------------|
|           |             |                            |                               | RSV F vaccine<br>no. of events per 100 person-years | Through end of follow-up<br>Placebo<br>(no. of events) |
| Argentina |             |                            |                               | 98.3 person-years                                   | 50.2 person-years                                      |
|           | Antibiotics |                            |                               |                                                     |                                                        |
|           |             | Penicillins                |                               |                                                     |                                                        |
|           |             |                            | Amoxicillin                   | 14.2 (14)                                           | 17.9 (9)                                               |
|           |             |                            | Ampicillin                    | 1.0 (1)                                             | 11.9 (6)                                               |
|           |             |                            | Cloxacillin                   | 0.0 (0)                                             | 0.0 (0)                                                |
|           |             |                            | Dicloxacillin                 | 0.0 (0)                                             | 0.0 (0)                                                |
|           |             |                            | Floxacillin                   | 0.0 (0)                                             | 0.0 (0)                                                |
|           |             |                            | Oxacillin                     | 0.0 (0)                                             | 0.0 (0)                                                |
|           |             |                            | Penicillin                    | 11.2 (11)                                           | 8.0 (4)                                                |
|           |             |                            | Piperacillin                  | 0.0 (0)                                             | 0.0 (0)                                                |
|           |             | Cephalosporins (I)         |                               |                                                     |                                                        |
|           |             |                            | Cefadroxil                    | 0.0 (0)                                             | 0.0 (0)                                                |
|           |             |                            | Cefalexin                     | 4.1 (4)                                             | 13.9 (7)                                               |
|           |             |                            | Cefalotin                     | 14.2 (14)                                           | 15.9 (8)                                               |
|           |             |                            | Cefazolin                     | 0.0 (0)                                             | 0.0 (0)                                                |
|           |             |                            | Cefradine                     | 0.0 (0)                                             | 0.0 (0)                                                |
|           |             | Cephalosporins (II)        |                               |                                                     |                                                        |
|           |             |                            | Cefaclor                      | 0.0 (0)                                             | 0.0 (0)                                                |
|           |             |                            | Cefoxitin                     | 0.0 (0)                                             | 0.0 (0)                                                |
|           |             |                            | Cefprozil                     | 0.0 (0)                                             | 0.0 (0)                                                |
|           |             |                            | Cefuroxime axetil             | 0.0 (0)                                             | 0.0 (0)                                                |
|           |             | Cephalosporins (III or IV) |                               |                                                     |                                                        |
|           |             |                            | Cefdinir                      | 0.0 (0)                                             | 0.0 (0)                                                |
|           |             |                            | Cefditoren                    | 0.0 (0)                                             | 0.0 (0)                                                |
|           |             |                            | Cefepime                      | 0.0 (0)                                             | 0.0 (0)                                                |
|           |             |                            | Cefixime                      | 0.0 (0)                                             | 0.0 (0)                                                |
|           |             |                            | Cefotaxime                    | 0.0 (0)                                             | 0.0 (0)                                                |
|           |             |                            | Cefpodoxime                   | 0.0 (0)                                             | 0.0 (0)                                                |
|           |             |                            | Ceftazidime                   | 0.0 (0)                                             | 0.0 (0)                                                |
|           |             |                            | Ceftibuten                    | 0.0 (0)                                             | 0.0 (0)                                                |
|           |             |                            | Ceftriaxone                   | 0.0 (0)                                             | 4.0 (2)                                                |
|           |             | Macrolides                 |                               |                                                     |                                                        |
|           |             |                            | Azithromycin                  | 1.0 (1)                                             | 0.0 (0)                                                |
|           |             |                            | Clarithromycin                | 1.0 (1)                                             | 0.0 (0)                                                |
|           |             |                            | Erythromycin                  | 0.0 (0)                                             | 0.0 (0)                                                |
|           |             |                            | Roxithromycin                 | 0.0 (0)                                             | 0.0 (0)                                                |
|           |             | Aminoglycosides            |                               |                                                     |                                                        |
|           |             |                            | Amikacin                      | 0.0 (0)                                             | 0.0 (0)                                                |
|           |             |                            | Gentamicin                    | 18.3 (18)                                           | 19.9 (10)                                              |
|           |             |                            | Tobramycin                    | 0.0 (0)                                             | 0.0 (0)                                                |
|           |             | Other antibiotics          |                               |                                                     |                                                        |
|           |             |                            | Bacitracin                    | 0.0 (0)                                             | 0.0 (0)                                                |
|           |             |                            | Benzalkonium chloride         | 0.0 (0)                                             | 2.0 (1)                                                |
|           |             |                            | Chloramphenicol               | 0.0 (0)                                             | 0.0 (0)                                                |
|           |             |                            | Ciprofloxacin                 | 0.0 (0)                                             | 0.0 (0)                                                |
|           |             |                            | Clindamycin                   | 1.0 (1)                                             | 2.0 (1)                                                |
|           |             |                            | Doxycycline                   | 0.0 (0)                                             | 0.0 (0)                                                |
|           |             |                            | Ertapenem                     | 0.0 (0)                                             | 0.0 (0)                                                |
|           |             |                            | Ethambutol                    | 0.0 (0)                                             | 0.0 (0)                                                |
|           |             |                            | Fosfomycin                    | 0.0 (0)                                             | 0.0 (0)                                                |
|           |             |                            | Hexamine                      | 0.0 (0)                                             | 0.0 (0)                                                |
|           |             |                            | Isoniazid                     | 0.0 (0)                                             | 0.0 (0)                                                |
|           |             |                            | Levofloxacin                  | 0.0 (0)                                             | 0.0 (0)                                                |
|           |             |                            | Linezolid                     | 0.0 (0)                                             | 0.0 (0)                                                |
|           |             |                            | Meropenem                     | 0.0 (0)                                             | 0.0 (0)                                                |
|           |             |                            | Metronidazole                 | 20.4 (20)                                           | 15.9 (8)                                               |
|           |             |                            | Minocycline                   | 0.0 (0)                                             | 0.0 (0)                                                |
|           |             |                            | Moxifloxacin                  | 0.0 (0)                                             | 0.0 (0)                                                |
|           |             |                            | Nitrofurantoin                | 1.0 (1)                                             | 0.0 (0)                                                |
|           |             |                            | Polymyxin                     | 0.0 (0)                                             | 0.0 (0)                                                |
|           |             |                            | Pyrazinamide                  | 0.0 (0)                                             | 0.0 (0)                                                |
|           |             |                            | Rifampicin                    | 1.0 (1)                                             | 0.0 (0)                                                |
|           |             |                            | Trimethoprim-sulfamethoxazole | 2.0 (2)                                             | 4.0 (2)                                                |
|           |             |                            | Vancomycin                    | 1.0 (1)                                             | 0.0 (0)                                                |
|           |             |                            | Unknown antibiotic            | 0.0 (0)                                             | 0.0 (0)                                                |
|           | Antivirals  |                            |                               |                                                     |                                                        |

|           |                            |                       |                   |                   |
|-----------|----------------------------|-----------------------|-------------------|-------------------|
|           |                            | Abacavir              | 0.0 (0)           | 0.0 (0)           |
|           |                            | Aciclovir             | 0.0 (0)           | 0.0 (0)           |
|           |                            | Amantadine            | 0.0 (0)           | 0.0 (0)           |
|           |                            | Efavirenz             | 0.0 (0)           | 0.0 (0)           |
|           |                            | Emtricitabine         | 0.0 (0)           | 0.0 (0)           |
|           |                            | Ganciclovir           | 0.0 (0)           | 0.0 (0)           |
|           |                            | Lamivudine            | 0.0 (0)           | 0.0 (0)           |
|           |                            | Lopinavir             | 0.0 (0)           | 0.0 (0)           |
|           |                            | Nevirapine            | 0.0 (0)           | 0.0 (0)           |
|           |                            | Oseltamivir           | 0.0 (0)           | 0.0 (0)           |
|           |                            | Tenofovir             | 0.0 (0)           | 0.0 (0)           |
|           |                            | Valaciclovir          | 0.0 (0)           | 0.0 (0)           |
|           |                            | Zidovudine            | 0.0 (0)           | 0.0 (0)           |
|           | Antifungals                |                       |                   |                   |
|           |                            | Fluconazole           | 0.0 (0)           | 0.0 (0)           |
|           |                            | Itraconazole          | 0.0 (0)           | 0.0 (0)           |
|           |                            | Ketoconazole          | 0.0 (0)           | 0.0 (0)           |
|           |                            | Miconazole            | 0.0 (0)           | 0.0 (0)           |
|           |                            | Nystatin              | 0.0 (0)           | 0.0 (0)           |
|           |                            | Unknown antifungal    | 0.0 (0)           | 0.0 (0)           |
|           | Other antimicrobials       |                       |                   |                   |
|           |                            | Ornidazole            | 0.0 (0)           | 6.0 (3)           |
| Australia |                            |                       | 47.0 person-years | 24.4 person-years |
|           | Antibiotics                |                       |                   |                   |
|           | Penicillins                |                       |                   |                   |
|           |                            | Amoxicillin           | 29.8 (14)         | 20.5 (5)          |
|           |                            | Ampicillin            | 2.1 (1)           | 0.0 (0)           |
|           |                            | Cloxacillin           | 0.0 (0)           | 0.0 (0)           |
|           |                            | Dicloxacillin         | 4.3 (2)           | 4.1 (1)           |
|           |                            | Floxacillin           | 14.9 (7)          | 0.0 (0)           |
|           |                            | Oxacillin             | 0.0 (0)           | 0.0 (0)           |
|           |                            | Penicillin            | 25.5 (12)         | 57.3 (14)         |
|           |                            | Piperacillin          | 2.1 (1)           | 0.0 (0)           |
|           | Cephalosporins (I)         |                       |                   |                   |
|           |                            | Cefadroxil            | 0.0 (0)           | 0.0 (0)           |
|           |                            | Cefalexin             | 34.0 (16)         | 20.5 (5)          |
|           |                            | Cefalotin             | 2.1 (1)           | 0.0 (0)           |
|           |                            | Cefazolin             | 12.8 (6)          | 8.2 (2)           |
|           |                            | Cefradine             | 0.0 (0)           | 0.0 (0)           |
|           | Cephalosporins (II)        |                       |                   |                   |
|           |                            | Cefaclor              | 0.0 (0)           | 0.0 (0)           |
|           |                            | Cefoxitin             | 0.0 (0)           | 0.0 (0)           |
|           |                            | Cefprozil             | 0.0 (0)           | 0.0 (0)           |
|           |                            | Cefuroxime axetil     | 0.0 (0)           | 0.0 (0)           |
|           | Cephalosporins (III or IV) |                       |                   |                   |
|           |                            | Cefdinir              | 0.0 (0)           | 0.0 (0)           |
|           |                            | Cefditoren            | 0.0 (0)           | 0.0 (0)           |
|           |                            | Cefepime              | 0.0 (0)           | 0.0 (0)           |
|           |                            | Cefixime              | 0.0 (0)           | 0.0 (0)           |
|           |                            | Cefotaxime            | 0.0 (0)           | 0.0 (0)           |
|           |                            | Cefpodoxime           | 0.0 (0)           | 0.0 (0)           |
|           |                            | Ceftazidime           | 0.0 (0)           | 0.0 (0)           |
|           |                            | Ceftibuten            | 0.0 (0)           | 0.0 (0)           |
|           |                            | Ceftriaxone           | 0.0 (0)           | 0.0 (0)           |
|           | Macrolides                 |                       |                   |                   |
|           |                            | Azithromycin          | 0.0 (0)           | 0.0 (0)           |
|           |                            | Clarithromycin        | 0.0 (0)           | 0.0 (0)           |
|           |                            | Erythromycin          | 0.0 (0)           | 0.0 (0)           |
|           |                            | Roxithromycin         | 0.0 (0)           | 0.0 (0)           |
|           | Aminoglycosides            |                       |                   |                   |
|           |                            | Amikacin              | 0.0 (0)           | 0.0 (0)           |
|           |                            | Gentamicin            | 6.4 (3)           | 4.1 (1)           |
|           |                            | Tobramycin            | 0.0 (0)           | 0.0 (0)           |
|           | Other antibiotics          |                       |                   |                   |
|           |                            | Bacitracin            | 0.0 (0)           | 0.0 (0)           |
|           |                            | Benzalkonium chloride | 0.0 (0)           | 0.0 (0)           |
|           |                            | Chloramphenicol       | 0.0 (0)           | 0.0 (0)           |
|           |                            | Ciprofloxacin         | 0.0 (0)           | 0.0 (0)           |
|           |                            | Clindamycin           | 2.1 (1)           | 0.0 (0)           |
|           |                            | Doxycycline           | 0.0 (0)           | 0.0 (0)           |
|           |                            | Ertapenem             | 0.0 (0)           | 0.0 (0)           |
|           |                            | Ethambutol            | 0.0 (0)           | 0.0 (0)           |
|           |                            | Fosfomicin            | 0.0 (0)           | 0.0 (0)           |

|            |                            |                               |                   |                   |
|------------|----------------------------|-------------------------------|-------------------|-------------------|
|            |                            | Hexamine                      | 0.0 (0)           | 0.0 (0)           |
|            |                            | Isoniazid                     | 0.0 (0)           | 0.0 (0)           |
|            |                            | Levofloxacin                  | 0.0 (0)           | 0.0 (0)           |
|            |                            | Linezolid                     | 0.0 (0)           | 0.0 (0)           |
|            |                            | Meropenem                     | 0.0 (0)           | 0.0 (0)           |
|            |                            | Metronidazole                 | 14.9 (7)          | 4.1 (1)           |
|            |                            | Minocycline                   | 0.0 (0)           | 0.0 (0)           |
|            |                            | Moxifloxacin                  | 0.0 (0)           | 0.0 (0)           |
|            |                            | Nitrofurantoin                | 0.0 (0)           | 0.0 (0)           |
|            |                            | Polymyxin                     | 0.0 (0)           | 0.0 (0)           |
|            |                            | Pyrazinamide                  | 0.0 (0)           | 0.0 (0)           |
|            |                            | Rifampicin                    | 0.0 (0)           | 0.0 (0)           |
|            |                            | Trimethoprim-sulfamethoxazole | 0.0 (0)           | 0.0 (0)           |
|            |                            | Vancomycin                    | 0.0 (0)           | 0.0 (0)           |
|            |                            | Unknown antibiotic            | 0.0 (0)           | 8.2 (2)           |
|            | Antivirals                 |                               |                   |                   |
|            |                            | Abacavir                      | 0.0 (0)           | 0.0 (0)           |
|            |                            | Aciclovir                     | 4.3 (2)           | 0.0 (0)           |
|            |                            | Amantadine                    | 0.0 (0)           | 0.0 (0)           |
|            |                            | Efavirenz                     | 0.0 (0)           | 0.0 (0)           |
|            |                            | Emtricitabine                 | 0.0 (0)           | 0.0 (0)           |
|            |                            | Ganciclovir                   | 0.0 (0)           | 0.0 (0)           |
|            |                            | Lamivudine                    | 0.0 (0)           | 0.0 (0)           |
|            |                            | Lopinavir                     | 0.0 (0)           | 0.0 (0)           |
|            |                            | Nevirapine                    | 0.0 (0)           | 0.0 (0)           |
|            |                            | Oseltamivir                   | 0.0 (0)           | 0.0 (0)           |
|            |                            | Tenofovir                     | 0.0 (0)           | 0.0 (0)           |
|            |                            | Valaciclovir                  | 2.1 (1)           | 0.0 (0)           |
|            |                            | Zidovudine                    | 0.0 (0)           | 0.0 (0)           |
|            | Antifungals                |                               |                   |                   |
|            |                            | Fluconazole                   | 6.4 (3)           | 12.3 (3)          |
|            |                            | Itraconazole                  | 0.0 (0)           | 0.0 (0)           |
|            |                            | Ketoconazole                  | 0.0 (0)           | 0.0 (0)           |
|            |                            | Miconazole                    | 0.0 (0)           | 0.0 (0)           |
|            |                            | Nystatin                      | 10.6 (5)          | 0.0 (0)           |
|            |                            | Unknown antifungal            | 0.0 (0)           | 0.0 (0)           |
|            | Other antimicrobials       |                               |                   |                   |
|            |                            | Ornidazole                    | 0.0 (0)           | 0.0 (0)           |
| Bangladesh |                            |                               | 41.9 person-years | 26.5 person-years |
|            | Antibiotics                |                               |                   |                   |
|            | Penicillins                |                               |                   |                   |
|            |                            | Amoxicillin                   | 54.9 (23)         | 22.6 (6)          |
|            |                            | Ampicillin                    | 0.0 (0)           | 0.0 (0)           |
|            |                            | Cloxacillin                   | 0.0 (0)           | 0.0 (0)           |
|            |                            | Dicloxacillin                 | 0.0 (0)           | 0.0 (0)           |
|            |                            | Floxacillin                   | 28.6 (12)         | 7.5 (2)           |
|            |                            | Oxacillin                     | 0.0 (0)           | 0.0 (0)           |
|            |                            | Penicillin                    | 0.0 (0)           | 0.0 (0)           |
|            |                            | Piperacillin                  | 0.0 (0)           | 0.0 (0)           |
|            | Cephalosporins (I)         |                               |                   |                   |
|            |                            | Cefadroxil                    | 0.0 (0)           | 0.0 (0)           |
|            |                            | Cefalexin                     | 0.0 (0)           | 0.0 (0)           |
|            |                            | Cefalotin                     | 0.0 (0)           | 0.0 (0)           |
|            |                            | Cefazolin                     | 0.0 (0)           | 0.0 (0)           |
|            |                            | Cefradine                     | 7.2 (3)           | 7.5 (2)           |
|            | Cephalosporins (II)        |                               |                   |                   |
|            |                            | Cefaclor                      | 0.0 (0)           | 0.0 (0)           |
|            |                            | Cefoxitin                     | 0.0 (0)           | 0.0 (0)           |
|            |                            | Cefprozil                     | 0.0 (0)           | 0.0 (0)           |
|            |                            | Cefuroxime axetil             | 57.2 (24)         | 64.1 (17)         |
|            | Cephalosporins (III or IV) |                               |                   |                   |
|            |                            | Cefdinir                      | 0.0 (0)           | 0.0 (0)           |
|            |                            | Cefditoren                    | 0.0 (0)           | 0.0 (0)           |
|            |                            | Cefepime                      | 0.0 (0)           | 0.0 (0)           |
|            |                            | Cefixime                      | 14.3 (6)          | 15.1 (4)          |
|            |                            | Cefotaxime                    | 2.4 (1)           | 0.0 (0)           |
|            |                            | Cefpodoxime                   | 0.0 (0)           | 0.0 (0)           |
|            |                            | Ceftazidime                   | 0.0 (0)           | 0.0 (0)           |
|            |                            | Ceftibuten                    | 0.0 (0)           | 0.0 (0)           |
|            |                            | Ceftriaxone                   | 14.3 (6)          | 7.5 (2)           |
|            | Macrolides                 |                               |                   |                   |
|            |                            | Azithromycin                  | 66.8 (28)         | 64.1 (17)         |

|       |                      |                               |                   |                   |
|-------|----------------------|-------------------------------|-------------------|-------------------|
|       |                      | Clarithromycin                | 2.4 (1)           | 0.0 (0)           |
|       |                      | Erythromycin                  | 0.0 (0)           | 0.0 (0)           |
|       |                      | Roxithromycin                 | 0.0 (0)           | 0.0 (0)           |
|       | Aminoglycosides      |                               |                   |                   |
|       |                      | Amikacin                      | 0.0 (0)           | 0.0 (0)           |
|       |                      | Gentamicin                    | 2.4 (1)           | 0.0 (0)           |
|       |                      | Tobramycin                    | 0.0 (0)           | 0.0 (0)           |
|       | Other antibiotics    |                               |                   |                   |
|       |                      | Bacitracin                    | 0.0 (0)           | 0.0 (0)           |
|       |                      | Benzalkonium chloride         | 0.0 (0)           | 0.0 (0)           |
|       |                      | Chloramphenicol               | 0.0 (0)           | 0.0 (0)           |
|       |                      | Ciprofloxacin                 | 2.4 (1)           | 11.3 (3)          |
|       |                      | Clindamycin                   | 0.0 (0)           | 0.0 (0)           |
|       |                      | Doxycycline                   | 0.0 (0)           | 0.0 (0)           |
|       |                      | Ertapenem                     | 0.0 (0)           | 0.0 (0)           |
|       |                      | Ethambutol                    | 0.0 (0)           | 0.0 (0)           |
|       |                      | Fosfomycin                    | 0.0 (0)           | 0.0 (0)           |
|       |                      | Hexamine                      | 0.0 (0)           | 0.0 (0)           |
|       |                      | Isoniazid                     | 0.0 (0)           | 0.0 (0)           |
|       |                      | Levofloxacin                  | 0.0 (0)           | 0.0 (0)           |
|       |                      | Linezolid                     | 4.8 (2)           | 0.0 (0)           |
|       |                      | Meropenem                     | 0.0 (0)           | 0.0 (0)           |
|       |                      | Metronidazole                 | 38.2 (16)         | 15.1 (4)          |
|       |                      | Minocycline                   | 0.0 (0)           | 0.0 (0)           |
|       |                      | Moxifloxacin                  | 0.0 (0)           | 0.0 (0)           |
|       |                      | Nitrofurantoin                | 0.0 (0)           | 3.8 (1)           |
|       |                      | Polymyxin                     | 0.0 (0)           | 0.0 (0)           |
|       |                      | Pyrazinamide                  | 0.0 (0)           | 0.0 (0)           |
|       |                      | Rifampicin                    | 0.0 (0)           | 0.0 (0)           |
|       |                      | Trimethoprim-sulfamethoxazole | 0.0 (0)           | 0.0 (0)           |
|       |                      | Vancomycin                    | 0.0 (0)           | 0.0 (0)           |
|       |                      | Unknown antibiotic            | 2.4 (1)           | 0.0 (0)           |
|       | Antivirals           |                               |                   |                   |
|       |                      | Abacavir                      | 0.0 (0)           | 0.0 (0)           |
|       |                      | Aciclovir                     | 0.0 (0)           | 0.0 (0)           |
|       |                      | Amantadine                    | 0.0 (0)           | 0.0 (0)           |
|       |                      | Efavirenz                     | 0.0 (0)           | 0.0 (0)           |
|       |                      | Emtricitabine                 | 0.0 (0)           | 0.0 (0)           |
|       |                      | Ganciclovir                   | 0.0 (0)           | 0.0 (0)           |
|       |                      | Lamivudine                    | 0.0 (0)           | 0.0 (0)           |
|       |                      | Lopinavir                     | 0.0 (0)           | 0.0 (0)           |
|       |                      | Nevirapine                    | 0.0 (0)           | 0.0 (0)           |
|       |                      | Oseltamivir                   | 0.0 (0)           | 0.0 (0)           |
|       |                      | Tenofovir                     | 0.0 (0)           | 0.0 (0)           |
|       |                      | Valaciclovir                  | 0.0 (0)           | 0.0 (0)           |
|       |                      | Zidovudine                    | 0.0 (0)           | 0.0 (0)           |
|       | Antifungals          |                               |                   |                   |
|       |                      | Fluconazole                   | 11.9 (5)          | 3.8 (1)           |
|       |                      | Itraconazole                  | 2.4 (1)           | 0.0 (0)           |
|       |                      | Ketoconazole                  | 0.0 (0)           | 0.0 (0)           |
|       |                      | Miconazole                    | 2.4 (1)           | 3.8 (1)           |
|       |                      | Nystatin                      | 0.0 (0)           | 0.0 (0)           |
|       |                      | Unknown antifungal            | 0.0 (0)           | 0.0 (0)           |
|       | Other antimicrobials |                               |                   |                   |
|       |                      | Ornidazole                    | 0.0 (0)           | 0.0 (0)           |
| Chile |                      |                               | 12.0 person-years | 11.9 person-years |
|       | Antibiotics          |                               |                   |                   |
|       | Penicillins          |                               |                   |                   |
|       |                      | Amoxicillin                   | 8.4 (1)           | 8.4 (1)           |
|       |                      | Ampicillin                    | 0.0 (0)           | 16.8 (2)          |
|       |                      | Cloxacillin                   | 0.0 (0)           | 8.4 (1)           |
|       |                      | Dicloxacillin                 | 0.0 (0)           | 0.0 (0)           |
|       |                      | Floxacillin                   | 8.4 (1)           | 0.0 (0)           |
|       |                      | Oxacillin                     | 0.0 (0)           | 0.0 (0)           |
|       |                      | Penicillin                    | 8.4 (1)           | 42.1 (5)          |
|       |                      | Piperacillin                  | 0.0 (0)           | 0.0 (0)           |
|       | Cephalosporins (I)   |                               |                   |                   |
|       |                      | Cefadroxil                    | 16.7 (2)          | 0.0 (0)           |
|       |                      | Cefalexin                     | 0.0 (0)           | 0.0 (0)           |
|       |                      | Cefalotin                     | 0.0 (0)           | 0.0 (0)           |
|       |                      | Cefazolin                     | 8.4 (1)           | 16.8 (2)          |
|       |                      | Cefradine                     | 0.0 (0)           | 0.0 (0)           |
|       | Cephalosporins (II)  |                               |                   |                   |



|       |                               |         |          |
|-------|-------------------------------|---------|----------|
|       | Cefaclor                      | 0.0 (0) | 0.0 (0)  |
|       | Cefoxitin                     | 0.0 (0) | 0.0 (0)  |
|       | Cefprozil                     | 0.0 (0) | 0.0 (0)  |
|       | Cefuroxime axetil             | 0.0 (0) | 0.0 (0)  |
|       | Cephalosporins (III or IV)    |         |          |
|       | Cefdinir                      | 0.0 (0) | 0.0 (0)  |
|       | Cefditoren                    | 0.0 (0) | 0.0 (0)  |
|       | Cefepime                      | 0.0 (0) | 0.0 (0)  |
|       | Cefixime                      | 0.0 (0) | 0.0 (0)  |
|       | Cefotaxime                    | 0.0 (0) | 0.0 (0)  |
|       | Cefpodoxime                   | 0.0 (0) | 0.0 (0)  |
|       | Ceftazidime                   | 0.0 (0) | 0.0 (0)  |
|       | Ceftibuten                    | 0.0 (0) | 0.0 (0)  |
|       | Ceftriaxone                   | 0.0 (0) | 0.0 (0)  |
|       | Macrolides                    |         |          |
|       | Azithromycin                  | 0.0 (0) | 0.0 (0)  |
|       | Clarithromycin                | 0.0 (0) | 0.0 (0)  |
|       | Erythromycin                  | 0.0 (0) | 0.0 (0)  |
|       | Roxithromycin                 | 0.0 (0) | 0.0 (0)  |
|       | Aminoglycosides               |         |          |
|       | Amikacin                      | 0.0 (0) | 0.0 (0)  |
|       | Gentamicin                    | 0.0 (0) | 16.8 (2) |
|       | Tobramycin                    | 0.0 (0) | 0.0 (0)  |
|       | Other antibiotics             |         |          |
|       | Bacitracin                    | 0.0 (0) | 0.0 (0)  |
|       | Benzalkonium chloride         | 0.0 (0) | 0.0 (0)  |
|       | Chloramphenicol               | 0.0 (0) | 0.0 (0)  |
|       | Ciprofloxacin                 | 0.0 (0) | 0.0 (0)  |
|       | Clindamycin                   | 0.0 (0) | 0.0 (0)  |
|       | Doxycycline                   | 0.0 (0) | 0.0 (0)  |
|       | Ertapenem                     | 0.0 (0) | 0.0 (0)  |
|       | Ethambutol                    | 0.0 (0) | 0.0 (0)  |
|       | Fosfomycin                    | 0.0 (0) | 0.0 (0)  |
|       | Hexamine                      | 0.0 (0) | 0.0 (0)  |
|       | Isoniazid                     | 0.0 (0) | 0.0 (0)  |
|       | Levofloxacin                  | 0.0 (0) | 0.0 (0)  |
|       | Linezolid                     | 0.0 (0) | 0.0 (0)  |
|       | Meropenem                     | 0.0 (0) | 0.0 (0)  |
|       | Metronidazole                 | 0.0 (0) | 8.4 (1)  |
|       | Minocycline                   | 0.0 (0) | 0.0 (0)  |
|       | Moxifloxacin                  | 0.0 (0) | 0.0 (0)  |
|       | Nitrofurantoin                | 0.0 (0) | 8.4 (1)  |
|       | Polymyxin                     | 0.0 (0) | 0.0 (0)  |
|       | Pyrazinamide                  | 0.0 (0) | 0.0 (0)  |
|       | Rifampicin                    | 0.0 (0) | 0.0 (0)  |
|       | Trimethoprim-sulfamethoxazole | 0.0 (0) | 0.0 (0)  |
|       | Vancomycin                    | 0.0 (0) | 0.0 (0)  |
|       | Unknown antibiotic            | 0.0 (0) | 0.0 (0)  |
|       | Antivirals                    |         |          |
|       | Abacavir                      | 0.0 (0) | 0.0 (0)  |
|       | Aciclovir                     | 0.0 (0) | 0.0 (0)  |
|       | Amantadine                    | 0.0 (0) | 0.0 (0)  |
|       | Efavirenz                     | 0.0 (0) | 0.0 (0)  |
|       | Emtricitabine                 | 0.0 (0) | 0.0 (0)  |
|       | Ganciclovir                   | 0.0 (0) | 0.0 (0)  |
|       | Lamivudine                    | 0.0 (0) | 0.0 (0)  |
|       | Lopinavir                     | 0.0 (0) | 0.0 (0)  |
|       | Nevirapine                    | 0.0 (0) | 0.0 (0)  |
|       | Oseltamivir                   | 0.0 (0) | 0.0 (0)  |
|       | Tenofovir                     | 0.0 (0) | 0.0 (0)  |
|       | Valaciclovir                  | 0.0 (0) | 0.0 (0)  |
|       | Zidovudine                    | 0.0 (0) | 0.0 (0)  |
|       | Antifungals                   |         |          |
|       | Fluconazole                   | 0.0 (0) | 0.0 (0)  |
|       | Itraconazole                  | 0.0 (0) | 0.0 (0)  |
|       | Ketoconazole                  | 0.0 (0) | 0.0 (0)  |
|       | Miconazole                    | 0.0 (0) | 0.0 (0)  |
|       | Nystatin                      | 0.0 (0) | 0.0 (0)  |
|       | Unknown antifungal            | 0.0 (0) | 0.0 (0)  |
|       | Other antimicrobials          |         |          |
|       | Ornidazole                    | 0.0 (0) | 0.0 (0)  |
| Spain |                               |         |          |

15.3 person-years

6.9 person-years

Antibiotics

|                               |                            |                       |              |          |          |
|-------------------------------|----------------------------|-----------------------|--------------|----------|----------|
| Antibiotics                   | Penicillins                | Amoxicillin           | 58.7 (9)     | 72.5 (5) |          |
|                               |                            | Ampicillin            | 19.6 (3)     | 29.0 (2) |          |
|                               |                            | Cloxacillin           | 0.0 (0)      | 0.0 (0)  |          |
|                               |                            | Dicloxacillin         | 0.0 (0)      | 0.0 (0)  |          |
|                               |                            | Floxacillin           | 0.0 (0)      | 0.0 (0)  |          |
|                               |                            | Oxacillin             | 0.0 (0)      | 0.0 (0)  |          |
|                               |                            | Penicillin            | 26.1 (4)     | 58.0 (4) |          |
|                               |                            | Piperacillin          | 0.0 (0)      | 0.0 (0)  |          |
|                               |                            | Cephalosporins (I)    | Cefadroxil   | 0.0 (0)  | 0.0 (0)  |
|                               |                            |                       | Cefalexin    | 0.0 (0)  | 14.5 (1) |
|                               | Cefalotin                  |                       | 0.0 (0)      | 0.0 (0)  |          |
|                               | Cefazolin                  |                       | 19.6 (3)     | 14.5 (1) |          |
|                               | Cefradine                  |                       | 0.0 (0)      | 0.0 (0)  |          |
|                               | Cephalosporins (II)        | Cefaclor              | 0.0 (0)      | 0.0 (0)  |          |
|                               |                            | Cefoxitin             | 0.0 (0)      | 0.0 (0)  |          |
|                               |                            | Cefprozil             | 0.0 (0)      | 0.0 (0)  |          |
|                               |                            | Cefuroxime axetil     | 0.0 (0)      | 0.0 (0)  |          |
|                               | Cephalosporins (III or IV) | Cefdinir              | 0.0 (0)      | 0.0 (0)  |          |
|                               |                            | Cefditoren            | 0.0 (0)      | 14.5 (1) |          |
|                               |                            | Cefepime              | 0.0 (0)      | 0.0 (0)  |          |
|                               |                            | Cefixime              | 0.0 (0)      | 0.0 (0)  |          |
|                               |                            | Cefotaxime            | 6.5 (1)      | 0.0 (0)  |          |
|                               |                            | Cefpodoxime           | 0.0 (0)      | 0.0 (0)  |          |
|                               |                            | Ceftazidime           | 0.0 (0)      | 0.0 (0)  |          |
|                               |                            | Ceftibuten            | 0.0 (0)      | 0.0 (0)  |          |
|                               |                            | Ceftriaxone           | 6.5 (1)      | 0.0 (0)  |          |
|                               |                            | Macrolides            | Azithromycin | 0.0 (0)  | 0.0 (0)  |
|                               | Clarithromycin             |                       | 0.0 (0)      | 0.0 (0)  |          |
|                               | Erythromycin               |                       | 6.5 (1)      | 0.0 (0)  |          |
|                               | Roxithromycin              |                       | 0.0 (0)      | 0.0 (0)  |          |
|                               | Aminoglycosides            | Amikacin              | 0.0 (0)      | 0.0 (0)  |          |
|                               |                            | Gentamicin            | 0.0 (0)      | 14.5 (1) |          |
|                               |                            | Tobramycin            | 0.0 (0)      | 0.0 (0)  |          |
|                               | Other antibiotics          | Bacitracin            | 0.0 (0)      | 0.0 (0)  |          |
|                               |                            | Benzalkonium chloride | 0.0 (0)      | 0.0 (0)  |          |
|                               |                            | Chloramphenicol       | 0.0 (0)      | 0.0 (0)  |          |
|                               |                            | Ciprofloxacin         | 0.0 (0)      | 0.0 (0)  |          |
|                               |                            | Clindamycin           | 0.0 (0)      | 0.0 (0)  |          |
|                               |                            | Doxycycline           | 6.5 (1)      | 0.0 (0)  |          |
|                               |                            | Ertapenem             | 0.0 (0)      | 0.0 (0)  |          |
|                               |                            | Ethambutol            | 0.0 (0)      | 0.0 (0)  |          |
|                               |                            | Fosfomycin            | 6.5 (1)      | 14.5 (1) |          |
| Hexamine                      |                            | 0.0 (0)               | 0.0 (0)      |          |          |
| Isoniazid                     |                            | 0.0 (0)               | 0.0 (0)      |          |          |
| Levofloxacin                  |                            | 0.0 (0)               | 0.0 (0)      |          |          |
| Linezolid                     |                            | 0.0 (0)               | 0.0 (0)      |          |          |
| Meropenem                     |                            | 0.0 (0)               | 0.0 (0)      |          |          |
| Metronidazole                 |                            | 6.5 (1)               | 0.0 (0)      |          |          |
| Minocycline                   |                            | 0.0 (0)               | 0.0 (0)      |          |          |
| Moxifloxacin                  |                            | 0.0 (0)               | 0.0 (0)      |          |          |
| Nitrofurantoin                |                            | 0.0 (0)               | 0.0 (0)      |          |          |
| Polymyxin                     |                            | 0.0 (0)               | 0.0 (0)      |          |          |
| Pyrazinamide                  |                            | 0.0 (0)               | 0.0 (0)      |          |          |
| Rifampicin                    |                            | 0.0 (0)               | 0.0 (0)      |          |          |
| Trimethoprim-sulfamethoxazole |                            | 0.0 (0)               | 0.0 (0)      |          |          |
| Vancomycin                    |                            | 0.0 (0)               | 0.0 (0)      |          |          |
| Unknown antibiotic            | 0.0 (0)                    | 0.0 (0)               |              |          |          |
| Antivirals                    | Abacavir                   | 0.0 (0)               | 0.0 (0)      |          |          |
|                               | Aciclovir                  | 0.0 (0)               | 0.0 (0)      |          |          |
|                               | Amantadine                 | 0.0 (0)               | 0.0 (0)      |          |          |
|                               | Efavirenz                  | 0.0 (0)               | 0.0 (0)      |          |          |
|                               | Emtricitabine              | 0.0 (0)               | 0.0 (0)      |          |          |
|                               | Ganciclovir                | 0.0 (0)               | 0.0 (0)      |          |          |
|                               | Lamivudine                 | 0.0 (0)               | 0.0 (0)      |          |          |
|                               | Lopinavir                  | 0.0 (0)               | 0.0 (0)      |          |          |

|        |                            |                       |                  |                  |
|--------|----------------------------|-----------------------|------------------|------------------|
|        |                            | Nevirapine            | 0.0 (0)          | 0.0 (0)          |
|        |                            | Oseltamivir           | 0.0 (0)          | 0.0 (0)          |
|        |                            | Tenofovir             | 0.0 (0)          | 0.0 (0)          |
|        |                            | Valaciclovir          | 0.0 (0)          | 0.0 (0)          |
|        |                            | Zidovudine            | 0.0 (0)          | 0.0 (0)          |
|        | Antifungals                | Fluconazole           | 0.0 (0)          | 0.0 (0)          |
|        |                            | Itraconazole          | 0.0 (0)          | 0.0 (0)          |
|        |                            | Ketoconazole          | 0.0 (0)          | 0.0 (0)          |
|        |                            | Miconazole            | 0.0 (0)          | 0.0 (0)          |
|        |                            | Nystatin              | 0.0 (0)          | 0.0 (0)          |
|        |                            | Unknown antifungal    | 0.0 (0)          | 0.0 (0)          |
|        | Other antimicrobials       | Ornidazole            | 0.0 (0)          | 0.0 (0)          |
| Mexico |                            |                       | 4.6 person-years | 2.5 person-years |
|        | Antibiotics                |                       |                  |                  |
|        | Penicillins                |                       |                  |                  |
|        |                            | Amoxicillin           | 0.0 (0)          | 0.0 (0)          |
|        |                            | Ampicillin            | 0.0 (0)          | 0.0 (0)          |
|        |                            | Cloxacillin           | 0.0 (0)          | 0.0 (0)          |
|        |                            | Dicloxacillin         | 0.0 (0)          | 0.0 (0)          |
|        |                            | Floxacillin           | 0.0 (0)          | 0.0 (0)          |
|        |                            | Oxacillin             | 0.0 (0)          | 0.0 (0)          |
|        |                            | Penicillin            | 0.0 (0)          | 0.0 (0)          |
|        |                            | Piperacillin          | 0.0 (0)          | 0.0 (0)          |
|        | Cephalosporins (I)         |                       |                  |                  |
|        |                            | Cefadroxil            | 0.0 (0)          | 0.0 (0)          |
|        |                            | Cefalexin             | 0.0 (0)          | 0.0 (0)          |
|        |                            | Cefalotin             | 0.0 (0)          | 0.0 (0)          |
|        |                            | Cefazolin             | 0.0 (0)          | 0.0 (0)          |
|        |                            | Cefradine             | 0.0 (0)          | 0.0 (0)          |
|        | Cephalosporins (II)        |                       |                  |                  |
|        |                            | Cefaclor              | 0.0 (0)          | 0.0 (0)          |
|        |                            | Cefoxitin             | 0.0 (0)          | 0.0 (0)          |
|        |                            | Cefprozil             | 0.0 (0)          | 0.0 (0)          |
|        |                            | Cefuroxime axetil     | 0.0 (0)          | 0.0 (0)          |
|        | Cephalosporins (III or IV) |                       |                  |                  |
|        |                            | Cefdinir              | 0.0 (0)          | 0.0 (0)          |
|        |                            | Cefditoren            | 0.0 (0)          | 0.0 (0)          |
|        |                            | Cefepime              | 0.0 (0)          | 0.0 (0)          |
|        |                            | Cefixime              | 0.0 (0)          | 0.0 (0)          |
|        |                            | Cefotaxime            | 0.0 (0)          | 0.0 (0)          |
|        |                            | Cefpodoxime           | 0.0 (0)          | 0.0 (0)          |
|        |                            | Ceftazidime           | 0.0 (0)          | 0.0 (0)          |
|        |                            | Ceftibuten            | 0.0 (0)          | 0.0 (0)          |
|        |                            | Ceftriaxone           | 0.0 (0)          | 0.0 (0)          |
|        | Macrolides                 |                       |                  |                  |
|        |                            | Azithromycin          | 0.0 (0)          | 0.0 (0)          |
|        |                            | Clarithromycin        | 0.0 (0)          | 0.0 (0)          |
|        |                            | Erythromycin          | 0.0 (0)          | 0.0 (0)          |
|        |                            | Roxithromycin         | 0.0 (0)          | 0.0 (0)          |
|        | Aminoglycosides            |                       |                  |                  |
|        |                            | Amikacin              | 0.0 (0)          | 0.0 (0)          |
|        |                            | Gentamicin            | 0.0 (0)          | 0.0 (0)          |
|        |                            | Tobramycin            | 0.0 (0)          | 0.0 (0)          |
|        | Other antibiotics          |                       |                  |                  |
|        |                            | Bacitracin            | 0.0 (0)          | 0.0 (0)          |
|        |                            | Benzalkonium chloride | 0.0 (0)          | 0.0 (0)          |
|        |                            | Chloramphenicol       | 0.0 (0)          | 0.0 (0)          |
|        |                            | Ciprofloxacin         | 0.0 (0)          | 0.0 (0)          |
|        |                            | Clindamycin           | 0.0 (0)          | 0.0 (0)          |
|        |                            | Doxycycline           | 0.0 (0)          | 0.0 (0)          |
|        |                            | Ertapenem             | 0.0 (0)          | 0.0 (0)          |
|        |                            | Ethambutol            | 0.0 (0)          | 0.0 (0)          |
|        |                            | Fosfomycin            | 0.0 (0)          | 0.0 (0)          |
|        |                            | Hexamine              | 0.0 (0)          | 0.0 (0)          |
|        |                            | Isoniazid             | 0.0 (0)          | 0.0 (0)          |
|        |                            | Levofloxacin          | 0.0 (0)          | 0.0 (0)          |
|        |                            | Linezolid             | 0.0 (0)          | 0.0 (0)          |
|        |                            | Meropenem             | 0.0 (0)          | 0.0 (0)          |
|        |                            | Metronidazole         | 0.0 (0)          | 0.0 (0)          |
|        |                            | Minocycline           | 0.0 (0)          | 0.0 (0)          |
|        |                            | Moxifloxacin          | 0.0 (0)          | 0.0 (0)          |

|             |                            |                               |                          |                          |
|-------------|----------------------------|-------------------------------|--------------------------|--------------------------|
|             |                            | Nitrofurantoin                | 0.0 (0)                  | 0.0 (0)                  |
|             |                            | Polymyxin                     | 0.0 (0)                  | 0.0 (0)                  |
|             |                            | Pyrazinamide                  | 0.0 (0)                  | 0.0 (0)                  |
|             |                            | Rifampicin                    | 0.0 (0)                  | 0.0 (0)                  |
|             |                            | Trimethoprim-sulfamethoxazole | 0.0 (0)                  | 0.0 (0)                  |
|             |                            | Vancomycin                    | 0.0 (0)                  | 0.0 (0)                  |
|             |                            | Unknown antibiotic            | 0.0 (0)                  | 0.0 (0)                  |
|             | Antivirals                 |                               |                          |                          |
|             |                            | Abacavir                      | 0.0 (0)                  | 0.0 (0)                  |
|             |                            | Aciclovir                     | 0.0 (0)                  | 0.0 (0)                  |
|             |                            | Amantadine                    | 0.0 (0)                  | 0.0 (0)                  |
|             |                            | Efavirenz                     | 0.0 (0)                  | 0.0 (0)                  |
|             |                            | Emtricitabine                 | 0.0 (0)                  | 0.0 (0)                  |
|             |                            | Ganciclovir                   | 0.0 (0)                  | 0.0 (0)                  |
|             |                            | Lamivudine                    | 0.0 (0)                  | 0.0 (0)                  |
|             |                            | Lopinavir                     | 0.0 (0)                  | 0.0 (0)                  |
|             |                            | Nevirapine                    | 0.0 (0)                  | 0.0 (0)                  |
|             |                            | Oseltamivir                   | 0.0 (0)                  | 0.0 (0)                  |
|             |                            | Tenofovir                     | 0.0 (0)                  | 0.0 (0)                  |
|             |                            | Valaciclovir                  | 0.0 (0)                  | 0.0 (0)                  |
|             |                            | Zidovudine                    | 0.0 (0)                  | 0.0 (0)                  |
|             | Antifungals                |                               |                          |                          |
|             |                            | Fluconazole                   | 0.0 (0)                  | 0.0 (0)                  |
|             |                            | Itraconazole                  | 0.0 (0)                  | 0.0 (0)                  |
|             |                            | Ketoconazole                  | 0.0 (0)                  | 0.0 (0)                  |
|             |                            | Miconazole                    | 0.0 (0)                  | 0.0 (0)                  |
|             |                            | Nystatin                      | 0.0 (0)                  | 0.0 (0)                  |
|             |                            | Unknown antifungal            | 0.0 (0)                  | 0.0 (0)                  |
|             | Other antimicrobials       |                               |                          |                          |
|             |                            | Ornidazole                    | 0.0 (0)                  | 0.0 (0)                  |
| New Zealand |                            |                               | <i>90.9 person-years</i> | <i>53.7 person-years</i> |
|             | Antibiotics                |                               |                          |                          |
|             | Penicillins                |                               |                          |                          |
|             |                            | Amoxicillin                   | 74.8 (68)                | 54.0 (29)                |
|             |                            | Ampicillin                    | 0.0 (0)                  | 0.0 (0)                  |
|             |                            | Cloxacillin                   | 0.0 (0)                  | 0.0 (0)                  |
|             |                            | Dicloxacillin                 | 0.0 (0)                  | 0.0 (0)                  |
|             |                            | Floxacillin                   | 20.9 (19)                | 11.2 (6)                 |
|             |                            | Oxacillin                     | 0.0 (0)                  | 0.0 (0)                  |
|             |                            | Penicillin                    | 22.0 (20)                | 27.9 (15)                |
|             |                            | Piperacillin                  | 0.0 (0)                  | 0.0 (0)                  |
|             | Cephalosporins (I)         |                               |                          |                          |
|             |                            | Cefadroxil                    | 0.0 (0)                  | 0.0 (0)                  |
|             |                            | Cefalexin                     | 0.0 (0)                  | 0.0 (0)                  |
|             |                            | Cefalotin                     | 0.0 (0)                  | 0.0 (0)                  |
|             |                            | Cefazolin                     | 9.9 (9)                  | 11.2 (6)                 |
|             |                            | Cefradine                     | 0.0 (0)                  | 0.0 (0)                  |
|             | Cephalosporins (II)        |                               |                          |                          |
|             |                            | Cefaclor                      | 3.3 (3)                  | 1.9 (1)                  |
|             |                            | Cefoxitin                     | 0.0 (0)                  | 0.0 (0)                  |
|             |                            | Cefprozil                     | 0.0 (0)                  | 0.0 (0)                  |
|             |                            | Cefuroxime axetil             | 5.5 (5)                  | 9.3 (5)                  |
|             | Cephalosporins (III or IV) |                               |                          |                          |
|             |                            | Cefdinir                      | 0.0 (0)                  | 0.0 (0)                  |
|             |                            | Cefditoren                    | 0.0 (0)                  | 0.0 (0)                  |
|             |                            | Cefepime                      | 0.0 (0)                  | 0.0 (0)                  |
|             |                            | Cefixime                      | 0.0 (0)                  | 0.0 (0)                  |
|             |                            | Cefotaxime                    | 0.0 (0)                  | 0.0 (0)                  |
|             |                            | Cefpodoxime                   | 0.0 (0)                  | 0.0 (0)                  |
|             |                            | Ceftazidime                   | 0.0 (0)                  | 0.0 (0)                  |
|             |                            | Ceftibuten                    | 0.0 (0)                  | 0.0 (0)                  |
|             |                            | Ceftriaxone                   | 0.0 (0)                  | 0.0 (0)                  |
|             | Macrolides                 |                               |                          |                          |
|             |                            | Azithromycin                  | 2.2 (2)                  | 1.9 (1)                  |
|             |                            | Clarithromycin                | 0.0 (0)                  | 0.0 (0)                  |
|             |                            | Erythromycin                  | 2.2 (2)                  | 5.6 (3)                  |
|             |                            | Roxithromycin                 | 1.1 (1)                  | 3.7 (2)                  |
|             | Aminoglycosides            |                               |                          |                          |
|             |                            | Amikacin                      | 0.0 (0)                  | 0.0 (0)                  |
|             |                            | Gentamicin                    | 1.1 (1)                  | 0.0 (0)                  |
|             |                            | Tobramycin                    | 0.0 (0)                  | 0.0 (0)                  |
|             | Other antibiotics          |                               |                          |                          |

|             |                      |                               |                    |                   |
|-------------|----------------------|-------------------------------|--------------------|-------------------|
|             |                      | Bacitracin                    | 0.0 (0)            | 0.0 (0)           |
|             |                      | Benzalkonium chloride         | 0.0 (0)            | 0.0 (0)           |
|             |                      | Chloramphenicol               | 0.0 (0)            | 0.0 (0)           |
|             |                      | Ciprofloxacin                 | 0.0 (0)            | 0.0 (0)           |
|             |                      | Clindamycin                   | 1.1 (1)            | 0.0 (0)           |
|             |                      | Doxycycline                   | 0.0 (0)            | 0.0 (0)           |
|             |                      | Ertapenem                     | 0.0 (0)            | 0.0 (0)           |
|             |                      | Ethambutol                    | 0.0 (0)            | 0.0 (0)           |
|             |                      | Fosfomycin                    | 0.0 (0)            | 0.0 (0)           |
|             |                      | Hexamine                      | 0.0 (0)            | 0.0 (0)           |
|             |                      | Isoniazid                     | 0.0 (0)            | 0.0 (0)           |
|             |                      | Levofloxacin                  | 0.0 (0)            | 0.0 (0)           |
|             |                      | Linezolid                     | 0.0 (0)            | 0.0 (0)           |
|             |                      | Meropenem                     | 0.0 (0)            | 0.0 (0)           |
|             |                      | Metronidazole                 | 5.5 (5)            | 3.7 (2)           |
|             |                      | Minocycline                   | 0.0 (0)            | 0.0 (0)           |
|             |                      | Moxifloxacin                  | 0.0 (0)            | 0.0 (0)           |
|             |                      | Nitrofurantoin                | 2.2 (2)            | 0.0 (0)           |
|             |                      | Polymyxin                     | 0.0 (0)            | 0.0 (0)           |
|             |                      | Pyrazinamide                  | 0.0 (0)            | 0.0 (0)           |
|             |                      | Rifampicin                    | 0.0 (0)            | 0.0 (0)           |
|             |                      | Trimethoprim-sulfamethoxazole | 9.9 (9)            | 5.6 (3)           |
|             |                      | Vancomycin                    | 0.0 (0)            | 0.0 (0)           |
|             |                      | Unknown antibiotic            | 0.0 (0)            | 0.0 (0)           |
|             | Antivirals           |                               |                    |                   |
|             |                      | Abacavir                      | 0.0 (0)            | 0.0 (0)           |
|             |                      | Aciclovir                     | 0.0 (0)            | 0.0 (0)           |
|             |                      | Amantadine                    | 0.0 (0)            | 0.0 (0)           |
|             |                      | Efavirenz                     | 0.0 (0)            | 0.0 (0)           |
|             |                      | Emtricitabine                 | 0.0 (0)            | 0.0 (0)           |
|             |                      | Ganciclovir                   | 0.0 (0)            | 0.0 (0)           |
|             |                      | Lamivudine                    | 0.0 (0)            | 0.0 (0)           |
|             |                      | Lopinavir                     | 0.0 (0)            | 0.0 (0)           |
|             |                      | Nevirapine                    | 0.0 (0)            | 0.0 (0)           |
|             |                      | Oseltamivir                   | 0.0 (0)            | 0.0 (0)           |
|             |                      | Tenofovir                     | 0.0 (0)            | 0.0 (0)           |
|             |                      | Valaciclovir                  | 0.0 (0)            | 0.0 (0)           |
|             |                      | Zidovudine                    | 0.0 (0)            | 0.0 (0)           |
|             | Antifungals          |                               |                    |                   |
|             |                      | Fluconazole                   | 1.1 (1)            | 0.0 (0)           |
|             |                      | Itraconazole                  | 0.0 (0)            | 0.0 (0)           |
|             |                      | Ketoconazole                  | 0.0 (0)            | 0.0 (0)           |
|             |                      | Miconazole                    | 0.0 (0)            | 0.0 (0)           |
|             |                      | Nystatin                      | 0.0 (0)            | 0.0 (0)           |
|             |                      | Unknown antifungal            | 0.0 (0)            | 0.0 (0)           |
|             | Other antimicrobials |                               |                    |                   |
|             |                      | Ornidazole                    | 0.0 (0)            | 0.0 (0)           |
| Philippines |                      |                               | 123.7 person-years | 57.3 person-years |
|             | Antibiotics          |                               |                    |                   |
|             |                      | Penicillins                   |                    |                   |
|             |                      | Amoxicillin                   | 121.3 (150)        | 125.6 (72)        |
|             |                      | Ampicillin                    | 55.0 (68)          | 50.6 (29)         |
|             |                      | Cloxacillin                   | 1.6 (2)            | 1.7 (1)           |
|             |                      | Dicloxacillin                 | 0.0 (0)            | 0.0 (0)           |
|             |                      | Floxacillin                   | 0.0 (0)            | 0.0 (0)           |
|             |                      | Oxacillin                     | 0.0 (0)            | 0.0 (0)           |
|             |                      | Penicillin                    | 0.0 (0)            | 0.0 (0)           |
|             |                      | Piperacillin                  | 0.0 (0)            | 0.0 (0)           |
|             |                      | Cephalosporins (I)            |                    |                   |
|             |                      | Cefadroxil                    | 0.0 (0)            | 0.0 (0)           |
|             |                      | Cefalexin                     | 21.8 (27)          | 17.4 (10)         |
|             |                      | Cefalotin                     | 0.0 (0)            | 0.0 (0)           |
|             |                      | Cefazolin                     | 0.0 (0)            | 0.0 (0)           |
|             |                      | Cefradine                     | 0.0 (0)            | 0.0 (0)           |
|             |                      | Cephalosporins (II)           |                    |                   |
|             |                      | Cefaclor                      | 0.0 (0)            | 0.0 (0)           |
|             |                      | Cefoxitin                     | 0.0 (0)            | 0.0 (0)           |
|             |                      | Cefprozil                     | 0.0 (0)            | 0.0 (0)           |
|             |                      | Cefuroxime axetil             | 38.8 (48)          | 40.1 (23)         |
|             |                      | Cephalosporins (III or IV)    |                    |                   |
|             |                      | Cefdinir                      | 0.0 (0)            | 0.0 (0)           |
|             |                      | Cefditoren                    | 0.0 (0)            | 0.0 (0)           |

|                |                      |                               |                   |                  |
|----------------|----------------------|-------------------------------|-------------------|------------------|
|                |                      | Cefepime                      | 0.0 (0)           | 0.0 (0)          |
|                |                      | Cefixime                      | 0.0 (0)           | 0.0 (0)          |
|                |                      | Cefotaxime                    | 0.0 (0)           | 0.0 (0)          |
|                |                      | Cefpodoxime                   | 0.0 (0)           | 0.0 (0)          |
|                |                      | Ceftazidime                   | 0.0 (0)           | 0.0 (0)          |
|                |                      | Ceftibuten                    | 0.0 (0)           | 0.0 (0)          |
|                |                      | Ceftriaxone                   | 0.0 (0)           | 0.0 (0)          |
|                | Macrolides           |                               |                   |                  |
|                |                      | Azithromycin                  | 3.2 (4)           | 5.2 (3)          |
|                |                      | Clarithromycin                | 2.4 (3)           | 3.5 (2)          |
|                |                      | Erythromycin                  | 2.4 (3)           | 0.0 (0)          |
|                |                      | Roxithromycin                 | 0.0 (0)           | 0.0 (0)          |
|                | Aminoglycosides      |                               |                   |                  |
|                |                      | Amikacin                      | 0.0 (0)           | 0.0 (0)          |
|                |                      | Gentamicin                    | 0.0 (0)           | 0.0 (0)          |
|                |                      | Tobramycin                    | 0.0 (0)           | 0.0 (0)          |
|                | Other antibiotics    |                               |                   |                  |
|                |                      | Bacitracin                    | 0.0 (0)           | 0.0 (0)          |
|                |                      | Benzalkonium chloride         | 0.0 (0)           | 0.0 (0)          |
|                |                      | Chloramphenicol               | 0.0 (0)           | 0.0 (0)          |
|                |                      | Ciprofloxacin                 | 0.0 (0)           | 0.0 (0)          |
|                |                      | Clindamycin                   | 0.0 (0)           | 3.5 (2)          |
|                |                      | Doxycycline                   | 0.0 (0)           | 0.0 (0)          |
|                |                      | Ertapenem                     | 0.0 (0)           | 0.0 (0)          |
|                |                      | Ethambutol                    | 0.0 (0)           | 0.0 (0)          |
|                |                      | Fosfomicin                    | 0.0 (0)           | 0.0 (0)          |
|                |                      | Hexamine                      | 0.0 (0)           | 0.0 (0)          |
|                |                      | Isoniazid                     | 0.0 (0)           | 0.0 (0)          |
|                |                      | Levofloxacin                  | 0.8 (1)           | 0.0 (0)          |
|                |                      | Linezolid                     | 0.0 (0)           | 0.0 (0)          |
|                |                      | Meropenem                     | 0.0 (0)           | 0.0 (0)          |
|                |                      | Metronidazole                 | 8.9 (11)          | 8.7 (5)          |
|                |                      | Minocycline                   | 0.0 (0)           | 0.0 (0)          |
|                |                      | Moxifloxacin                  | 0.0 (0)           | 0.0 (0)          |
|                |                      | Nitrofurantoin                | 0.8 (1)           | 0.0 (0)          |
|                |                      | Polymyxin                     | 0.0 (0)           | 0.0 (0)          |
|                |                      | Pyrazinamide                  | 0.0 (0)           | 0.0 (0)          |
|                |                      | Rifampicin                    | 0.0 (0)           | 0.0 (0)          |
|                |                      | Trimethoprim-sulfamethoxazole | 0.0 (0)           | 0.0 (0)          |
|                |                      | Vancomycin                    | 0.0 (0)           | 0.0 (0)          |
|                |                      | Unknown antibiotic            | 0.0 (0)           | 0.0 (0)          |
|                | Antivirals           |                               |                   |                  |
|                |                      | Abacavir                      | 0.0 (0)           | 0.0 (0)          |
|                |                      | Aciclovir                     | 1.6 (2)           | 0.0 (0)          |
|                |                      | Amantadine                    | 0.0 (0)           | 0.0 (0)          |
|                |                      | Efavirenz                     | 0.0 (0)           | 0.0 (0)          |
|                |                      | Emtricitabine                 | 0.0 (0)           | 0.0 (0)          |
|                |                      | Ganciclovir                   | 0.0 (0)           | 0.0 (0)          |
|                |                      | Lamivudine                    | 0.0 (0)           | 0.0 (0)          |
|                |                      | Lopinavir                     | 0.0 (0)           | 0.0 (0)          |
|                |                      | Nevirapine                    | 0.0 (0)           | 0.0 (0)          |
|                |                      | Oseltamivir                   | 0.0 (0)           | 0.0 (0)          |
|                |                      | Tenofovir                     | 0.0 (0)           | 0.0 (0)          |
|                |                      | Valaciclovir                  | 0.0 (0)           | 0.0 (0)          |
|                |                      | Zidovudine                    | 0.0 (0)           | 0.0 (0)          |
|                | Antifungals          |                               |                   |                  |
|                |                      | Fluconazole                   | 0.0 (0)           | 0.0 (0)          |
|                |                      | Itraconazole                  | 0.0 (0)           | 0.0 (0)          |
|                |                      | Ketoconazole                  | 0.0 (0)           | 0.0 (0)          |
|                |                      | Miconazole                    | 0.0 (0)           | 0.0 (0)          |
|                |                      | Nystatin                      | 0.0 (0)           | 0.0 (0)          |
|                |                      | Unknown antifungal            | 0.0 (0)           | 0.0 (0)          |
|                | Other antimicrobials |                               |                   |                  |
|                |                      | Ornidazole                    | 0.0 (0)           | 0.0 (0)          |
| United Kingdom |                      |                               | 13.9 person-years | 7.1 person-years |
|                | Antibiotics          |                               |                   |                  |
|                |                      | Penicillins                   |                   |                  |
|                |                      | Amoxicillin                   | 43.1 (6)          | 70.4 (5)         |
|                |                      | Ampicillin                    | 0.0 (0)           | 0.0 (0)          |
|                |                      | Cloxacillin                   | 0.0 (0)           | 0.0 (0)          |
|                |                      | Dicloxacillin                 | 0.0 (0)           | 0.0 (0)          |
|                |                      | Floxacillin                   | 7.2 (1)           | 28.2 (2)         |

|                            |                               |         |          |
|----------------------------|-------------------------------|---------|----------|
|                            | Oxacillin                     | 0.0 (0) | 0.0 (0)  |
|                            | Penicillin                    | 7.2 (1) | 0.0 (0)  |
|                            | Piperacillin                  | 0.0 (0) | 0.0 (0)  |
| Cephalosporins (I)         |                               |         |          |
|                            | Cefadroxil                    | 0.0 (0) | 0.0 (0)  |
|                            | Cefalexin                     | 7.2 (1) | 0.0 (0)  |
|                            | Cefalotin                     | 0.0 (0) | 0.0 (0)  |
|                            | Cefazolin                     | 0.0 (0) | 0.0 (0)  |
|                            | Cefradine                     | 0.0 (0) | 0.0 (0)  |
| Cephalosporins (II)        |                               |         |          |
|                            | Cefaclor                      | 0.0 (0) | 0.0 (0)  |
|                            | Cefoxitin                     | 0.0 (0) | 0.0 (0)  |
|                            | Cefprozil                     | 0.0 (0) | 0.0 (0)  |
|                            | Cefuroxime axetil             | 7.2 (1) | 0.0 (0)  |
| Cephalosporins (III or IV) |                               |         |          |
|                            | Cefdinir                      | 0.0 (0) | 0.0 (0)  |
|                            | Cefditoren                    | 0.0 (0) | 0.0 (0)  |
|                            | Cefepime                      | 0.0 (0) | 0.0 (0)  |
|                            | Cefixime                      | 0.0 (0) | 0.0 (0)  |
|                            | Cefotaxime                    | 0.0 (0) | 0.0 (0)  |
|                            | Cefpodoxime                   | 0.0 (0) | 0.0 (0)  |
|                            | Ceftazidime                   | 0.0 (0) | 0.0 (0)  |
|                            | Ceftibuten                    | 0.0 (0) | 0.0 (0)  |
|                            | Ceftriaxone                   | 0.0 (0) | 0.0 (0)  |
| Macrolides                 |                               |         |          |
|                            | Azithromycin                  | 0.0 (0) | 14.1 (1) |
|                            | Clarithromycin                | 7.2 (1) | 0.0 (0)  |
|                            | Erythromycin                  | 0.0 (0) | 0.0 (0)  |
|                            | Roxithromycin                 | 0.0 (0) | 0.0 (0)  |
| Aminoglycosides            |                               |         |          |
|                            | Amikacin                      | 0.0 (0) | 0.0 (0)  |
|                            | Gentamicin                    | 7.2 (1) | 0.0 (0)  |
|                            | Tobramycin                    | 0.0 (0) | 0.0 (0)  |
| Other antibiotics          |                               |         |          |
|                            | Bacitracin                    | 0.0 (0) | 0.0 (0)  |
|                            | Benzalkonium chloride         | 0.0 (0) | 0.0 (0)  |
|                            | Chloramphenicol               | 0.0 (0) | 0.0 (0)  |
|                            | Ciprofloxacin                 | 0.0 (0) | 0.0 (0)  |
|                            | Clindamycin                   | 0.0 (0) | 0.0 (0)  |
|                            | Doxycycline                   | 0.0 (0) | 0.0 (0)  |
|                            | Ertapenem                     | 0.0 (0) | 0.0 (0)  |
|                            | Ethambutol                    | 0.0 (0) | 0.0 (0)  |
|                            | Fosfomycin                    | 0.0 (0) | 0.0 (0)  |
|                            | Hexamine                      | 0.0 (0) | 0.0 (0)  |
|                            | Isoniazid                     | 0.0 (0) | 0.0 (0)  |
|                            | Levofloxacin                  | 0.0 (0) | 0.0 (0)  |
|                            | Linezolid                     | 0.0 (0) | 0.0 (0)  |
|                            | Meropenem                     | 0.0 (0) | 0.0 (0)  |
|                            | Metronidazole                 | 0.0 (0) | 0.0 (0)  |
|                            | Minocycline                   | 0.0 (0) | 0.0 (0)  |
|                            | Moxifloxacin                  | 0.0 (0) | 0.0 (0)  |
|                            | Nitrofurantoin                | 7.2 (1) | 0.0 (0)  |
|                            | Polymyxin                     | 0.0 (0) | 0.0 (0)  |
|                            | Pyrazinamide                  | 0.0 (0) | 0.0 (0)  |
|                            | Rifampicin                    | 0.0 (0) | 0.0 (0)  |
|                            | Trimethoprim-sulfamethoxazole | 7.2 (1) | 0.0 (0)  |
|                            | Vancomycin                    | 0.0 (0) | 0.0 (0)  |
|                            | Unknown antibiotic            | 0.0 (0) | 0.0 (0)  |
| Antivirals                 |                               |         |          |
|                            | Abacavir                      | 0.0 (0) | 0.0 (0)  |
|                            | Aciclovir                     | 0.0 (0) | 0.0 (0)  |
|                            | Amantadine                    | 0.0 (0) | 0.0 (0)  |
|                            | Efavirenz                     | 0.0 (0) | 0.0 (0)  |
|                            | Emtricitabine                 | 0.0 (0) | 0.0 (0)  |
|                            | Ganciclovir                   | 0.0 (0) | 0.0 (0)  |
|                            | Lamivudine                    | 0.0 (0) | 0.0 (0)  |
|                            | Lopinavir                     | 0.0 (0) | 0.0 (0)  |
|                            | Nevirapine                    | 0.0 (0) | 0.0 (0)  |
|                            | Oseltamivir                   | 0.0 (0) | 0.0 (0)  |
|                            | Tenofovir                     | 0.0 (0) | 0.0 (0)  |
|                            | Valaciclovir                  | 0.0 (0) | 0.0 (0)  |
|                            | Zidovudine                    | 0.0 (0) | 0.0 (0)  |
| Antifungals                |                               |         |          |
|                            | Fluconazole                   | 0.0 (0) | 0.0 (0)  |

|               |                            |                               |                           |                           |
|---------------|----------------------------|-------------------------------|---------------------------|---------------------------|
|               |                            | Itraconazole                  | 0.0 (0)                   | 0.0 (0)                   |
|               |                            | Ketoconazole                  | 0.0 (0)                   | 0.0 (0)                   |
|               |                            | Miconazole                    | 0.0 (0)                   | 0.0 (0)                   |
|               |                            | Nystatin                      | 0.0 (0)                   | 0.0 (0)                   |
|               |                            | Unknown antifungal            | 0.0 (0)                   | 0.0 (0)                   |
|               | Other antimicrobials       |                               |                           |                           |
|               |                            | Ornidazole                    | 0.0 (0)                   | 0.0 (0)                   |
| United States |                            |                               | <i>437.2 person-years</i> | <i>225.5 person-years</i> |
|               | Antibiotics                |                               |                           |                           |
|               | Penicillins                |                               |                           |                           |
|               |                            | Amoxicillin                   | 10.5 (46)                 | 8.0 (18)                  |
|               |                            | Ampicillin                    | 12.8 (56)                 | 13.7 (31)                 |
|               |                            | Cloxacillin                   | 0.0 (0)                   | 0.0 (0)                   |
|               |                            | Dicloxacillin                 | 2.7 (12)                  | 4.0 (9)                   |
|               |                            | Floxacillin                   | 0.0 (0)                   | 0.0 (0)                   |
|               |                            | Oxacillin                     | 0.0 (0)                   | 0.0 (0)                   |
|               |                            | Penicillin                    | 26.3 (115)                | 18.6 (42)                 |
|               |                            | Piperacillin                  | 0.7 (3)                   | 0.4 (1)                   |
|               | Cephalosporins (I)         |                               |                           |                           |
|               |                            | Cefadroxil                    | 0.0 (0)                   | 0.0 (0)                   |
|               |                            | Cefalexin                     | 8.2 (36)                  | 8.0 (18)                  |
|               |                            | Cefalotin                     | 0.0 (0)                   | 0.0 (0)                   |
|               |                            | Cefazolin                     | 7.3 (32)                  | 7.1 (16)                  |
|               |                            | Cefradine                     | 0.0 (0)                   | 0.4 (1)                   |
|               | Cephalosporins (II)        |                               |                           |                           |
|               |                            | Cefaclor                      | 0.0 (0)                   | 0.0 (0)                   |
|               |                            | Cefoxitin                     | 0.2 (1)                   | 0.0 (0)                   |
|               |                            | Cefprozil                     | 0.0 (0)                   | 0.0 (0)                   |
|               |                            | Cefuroxime axetil             | 0.0 (0)                   | 0.4 (1)                   |
|               | Cephalosporins (III or IV) |                               |                           |                           |
|               |                            | Cefdinir                      | 0.9 (4)                   | 1.8 (4)                   |
|               |                            | Cefditoren                    | 0.0 (0)                   | 0.0 (0)                   |
|               |                            | Cefepime                      | 0.0 (0)                   | 0.0 (0)                   |
|               |                            | Cefixime                      | 0.2 (1)                   | 0.4 (1)                   |
|               |                            | Cefotaxime                    | 0.0 (0)                   | 0.0 (0)                   |
|               |                            | Cefpodoxime                   | 0.0 (0)                   | 0.0 (0)                   |
|               |                            | Ceftazidime                   | 0.0 (0)                   | 0.0 (0)                   |
|               |                            | Ceftibuten                    | 0.0 (0)                   | 0.0 (0)                   |
|               |                            | Ceftriaxone                   | 1.6 (7)                   | 0.9 (2)                   |
|               | Macrolides                 |                               |                           |                           |
|               |                            | Azithromycin                  | 8.0 (35)                  | 7.5 (17)                  |
|               |                            | Clarithromycin                | 0.2 (1)                   | 0.0 (0)                   |
|               |                            | Erythromycin                  | 0.0 (0)                   | 0.0 (0)                   |
|               |                            | Roxithromycin                 | 0.0 (0)                   | 0.0 (0)                   |
|               | Aminoglycosides            |                               |                           |                           |
|               |                            | Amikacin                      | 0.0 (0)                   | 0.0 (0)                   |
|               |                            | Gentamicin                    | 2.5 (11)                  | 3.5 (8)                   |
|               |                            | Tobramycin                    | 0.0 (0)                   | 0.0 (0)                   |
|               | Other antibiotics          |                               |                           |                           |
|               |                            | Bacitracin                    | 0.0 (0)                   | 0.0 (0)                   |
|               |                            | Benzalkonium chloride         | 0.0 (0)                   | 0.0 (0)                   |
|               |                            | Chloramphenicol               | 0.0 (0)                   | 0.0 (0)                   |
|               |                            | Ciprofloxacin                 | 0.5 (2)                   | 0.4 (1)                   |
|               |                            | Clindamycin                   | 4.3 (19)                  | 5.8 (13)                  |
|               |                            | Doxycycline                   | 0.5 (2)                   | 0.4 (1)                   |
|               |                            | Ertapenem                     | 0.0 (0)                   | 0.0 (0)                   |
|               |                            | Ethambutol                    | 0.0 (0)                   | 0.0 (0)                   |
|               |                            | Fosfomycin                    | 0.0 (0)                   | 0.4 (1)                   |
|               |                            | Hexamine                      | 0.0 (0)                   | 0.0 (0)                   |
|               |                            | Isoniazid                     | 0.0 (0)                   | 0.0 (0)                   |
|               |                            | Levofloxacin                  | 0.5 (2)                   | 0.4 (1)                   |
|               |                            | Linezolid                     | 0.0 (0)                   | 0.0 (0)                   |
|               |                            | Meropenem                     | 0.0 (0)                   | 0.0 (0)                   |
|               |                            | Metronidazole                 | 0.9 (4)                   | 0.4 (1)                   |
|               |                            | Minocycline                   | 0.2 (1)                   | 0.0 (0)                   |
|               |                            | Moxifloxacin                  | 0.0 (0)                   | 0.0 (0)                   |
|               |                            | Nitrofurantoin                | 3.2 (14)                  | 3.1 (7)                   |
|               |                            | Polymyxin                     | 0.0 (0)                   | 0.0 (0)                   |
|               |                            | Pyrazinamide                  | 0.0 (0)                   | 0.0 (0)                   |
|               |                            | Rifampicin                    | 0.0 (0)                   | 0.0 (0)                   |
|               |                            | Trimethoprim-sulfamethoxazole | 1.1 (5)                   | 2.7 (6)                   |
|               |                            | Vancomycin                    | 0.2 (1)                   | 0.4 (1)                   |



|                      |                       |                            |                            |              |             |
|----------------------|-----------------------|----------------------------|----------------------------|--------------|-------------|
|                      |                       | Unknown antibiotic         | 0.2 (1)                    | 0.0 (0)      |             |
| South Africa         | Antivirals            | Abacavir                   | 0.0 (0)                    | 0.0 (0)      |             |
|                      |                       | Aciclovir                  | 1.4 (6)                    | 2.7 (6)      |             |
|                      |                       | Amantadine                 | 0.0 (0)                    | 0.0 (0)      |             |
|                      |                       | Efavirenz                  | 0.0 (0)                    | 0.0 (0)      |             |
|                      |                       | Emtricitabine              | 0.0 (0)                    | 0.0 (0)      |             |
|                      |                       | Ganciclovir                | 0.0 (0)                    | 0.0 (0)      |             |
|                      |                       | Lamivudine                 | 0.0 (0)                    | 0.0 (0)      |             |
|                      |                       | Lopinavir                  | 0.0 (0)                    | 0.0 (0)      |             |
|                      |                       | Nevirapine                 | 0.0 (0)                    | 0.0 (0)      |             |
|                      |                       | Oseltamivir                | 3.7 (16)                   | 1.8 (4)      |             |
|                      |                       | Tenofovir                  | 0.0 (0)                    | 0.0 (0)      |             |
|                      |                       | Valaciclovir               | 2.7 (12)                   | 0.9 (2)      |             |
|                      |                       | Zidovudine                 | 0.0 (0)                    | 0.0 (0)      |             |
|                      |                       | Antifungals                | Fluconazole                | 0.9 (4)      | 2.7 (6)     |
|                      |                       |                            | Itraconazole               | 0.0 (0)      | 0.0 (0)     |
|                      |                       |                            | Ketoconazole               | 0.0 (0)      | 0.0 (0)     |
| Miconazole           | 0.0 (0)               |                            | 0.0 (0)                    |              |             |
| Nystatin             | 0.0 (0)               |                            | 0.0 (0)                    |              |             |
| Unknown antifungal   | 0.0 (0)               |                            | 0.0 (0)                    |              |             |
| Other antimicrobials | Ornidazole            | 0.0 (0)                    | 0.0 (0)                    |              |             |
|                      |                       | <i>1035.0 person-years</i> | <i>527.6 person-years</i>  |              |             |
| South Africa         | Antibiotics           | Penicillins                | Amoxicillin                | 95.8 (992)   | 105.2 (555) |
|                      |                       |                            | Ampicillin                 | 7.4 (77)     | 4.9 (26)    |
|                      |                       |                            | Cloxacillin                | 1.1 (11)     | 0.8 (4)     |
|                      |                       |                            | Dicloxacillin              | 0.0 (0)      | 0.0 (0)     |
|                      |                       |                            | Floxacillin                | 0.5 (5)      | 0.9 (5)     |
|                      |                       |                            | Oxacillin                  | 0.0 (0)      | 0.0 (0)     |
|                      |                       |                            | Penicillin                 | 0.1 (1)      | 0.8 (4)     |
|                      |                       |                            | Piperacillin               | 0.1 (1)      | 0.2 (1)     |
|                      |                       | Cephalosporins (I)         | Cefadroxil                 | 0.0 (0)      | 0.0 (0)     |
|                      |                       |                            | Cefalexin                  | 0.8 (8)      | 2.1 (11)    |
|                      |                       |                            | Cefalotin                  | 0.0 (0)      | 0.0 (0)     |
|                      |                       |                            | Cefazolin                  | 5.8 (60)     | 4.5 (24)    |
|                      |                       |                            | Cefradine                  | 0.8 (8)      | 1.5 (8)     |
|                      |                       | Cephalosporins (II)        | Cefaclor                   | 0.0 (0)      | 0.0 (0)     |
|                      |                       |                            | Cefoxitin                  | 0.0 (0)      | 0.0 (0)     |
|                      |                       |                            | Cefprozil                  | 0.0 (0)      | 0.0 (0)     |
|                      |                       |                            | Cefuroxime axetil          | 0.8 (8)      | 0.6 (3)     |
|                      |                       |                            | Cephalosporins (III or IV) | Cefdinir     | 0.0 (0)     |
|                      |                       | Cefditoren                 |                            | 0.0 (0)      | 0.0 (0)     |
|                      |                       | Cefepime                   |                            | 0.0 (0)      | 0.0 (0)     |
|                      |                       | Cefixime                   |                            | 0.1 (1)      | 0.0 (0)     |
|                      |                       | Cefotaxime                 |                            | 0.3 (3)      | 0.0 (0)     |
|                      |                       | Cefpodoxime                |                            | 0.0 (0)      | 0.0 (0)     |
|                      |                       | Ceftazidime                |                            | 0.0 (0)      | 0.0 (0)     |
|                      |                       | Ceftibuten                 |                            | 0.0 (0)      | 0.0 (0)     |
|                      |                       | Ceftriaxone                |                            | 3.2 (33)     | 2.1 (11)    |
|                      |                       | Macrolides                 |                            | Azithromycin | 6.6 (68)    |
|                      |                       |                            | Clarithromycin             | 0.2 (2)      | 0.0 (0)     |
|                      |                       |                            | Erythromycin               | 0.6 (6)      | 0.2 (1)     |
|                      |                       |                            | Roxithromycin              | 0.0 (0)      | 0.0 (0)     |
|                      |                       | Aminoglycosides            | Amikacin                   | 0.0 (0)      | 0.0 (0)     |
|                      |                       |                            | Gentamicin                 | 1.4 (14)     | 0.8 (4)     |
|                      |                       |                            | Tobramycin                 | 0.0 (0)      | 0.0 (0)     |
| Other antibiotics    | Bacitracin            | 0.0 (0)                    | 0.0 (0)                    |              |             |
|                      | Benzalkonium chloride | 0.0 (0)                    | 0.0 (0)                    |              |             |
|                      | Chloramphenicol       | 0.1 (1)                    | 0.0 (0)                    |              |             |
|                      | Ciprofloxacin         | 0.5 (5)                    | 0.4 (2)                    |              |             |
|                      | Clindamycin           | 0.0 (0)                    | 0.4 (2)                    |              |             |
|                      | Doxycycline           | 0.0 (0)                    | 0.2 (1)                    |              |             |
|                      | Ertapenem             | 0.0 (0)                    | 0.0 (0)                    |              |             |

|                      |                               |            |           |
|----------------------|-------------------------------|------------|-----------|
|                      | Ethambutol                    | 0.0 (0)    | 0.2 (1)   |
|                      | Fosfomycin                    | 0.0 (0)    | 0.0 (0)   |
|                      | Hexamine                      | 0.0 (0)    | 0.0 (0)   |
|                      | Isoniazid                     | 0.1 (1)    | 0.2 (1)   |
|                      | Levofloxacin                  | 0.0 (0)    | 0.0 (0)   |
|                      | Linezolid                     | 0.0 (0)    | 0.0 (0)   |
|                      | Meropenem                     | 0.0 (0)    | 0.0 (0)   |
|                      | Metronidazole                 | 12.2 (126) | 10.2 (54) |
|                      | Minocycline                   | 0.0 (0)    | 0.0 (0)   |
|                      | Moxifloxacin                  | 0.0 (0)    | 0.0 (0)   |
|                      | Nitrofurantoin                | 0.0 (0)    | 0.0 (0)   |
|                      | Polymyxin                     | 0.0 (0)    | 0.0 (0)   |
|                      | Pyrazinamide                  | 0.0 (0)    | 0.2 (1)   |
|                      | Rifampicin                    | 0.0 (0)    | 0.2 (1)   |
|                      | Trimethoprim-sulfamethoxazole | 0.3 (3)    | 0.8 (4)   |
|                      | Vancomycin                    | 0.0 (0)    | 0.0 (0)   |
|                      | Unknown antibiotic            | 0.1 (1)    | 0.2 (1)   |
| Antivirals           |                               |            |           |
|                      | Abacavir                      | 0.0 (0)    | 0.0 (0)   |
|                      | Aciclovir                     | 0.1 (1)    | 0.4 (2)   |
|                      | Amantadine                    | 0.0 (0)    | 0.0 (0)   |
|                      | Efavirenz                     | 0.3 (3)    | 0.0 (0)   |
|                      | Emtricitabine                 | 0.2 (2)    | 0.0 (0)   |
|                      | Ganciclovir                   | 0.0 (0)    | 0.0 (0)   |
|                      | Lamivudine                    | 0.0 (0)    | 0.0 (0)   |
|                      | Lopinavir                     | 0.0 (0)    | 0.0 (0)   |
|                      | Nevirapine                    | 0.0 (0)    | 0.0 (0)   |
|                      | Oseltamivir                   | 0.0 (0)    | 0.0 (0)   |
|                      | Tenofovir                     | 0.2 (2)    | 0.0 (0)   |
|                      | Valaciclovir                  | 0.0 (0)    | 0.0 (0)   |
|                      | Zidovudine                    | 0.0 (0)    | 0.0 (0)   |
| Antifungals          |                               |            |           |
|                      | Fluconazole                   | 0.1 (1)    | 0.0 (0)   |
|                      | Itraconazole                  | 0.0 (0)    | 0.0 (0)   |
|                      | Ketoconazole                  | 0.1 (1)    | 0.4 (2)   |
|                      | Miconazole                    | 0.0 (0)    | 0.0 (0)   |
|                      | Nystatin                      | 0.1 (1)    | 0.0 (0)   |
|                      | Unknown antifungal            | 0.0 (0)    | 0.0 (0)   |
| Other antimicrobials |                               |            |           |
|                      | Ornidazole                    | 0.0 (0)    | 0.0 (0)   |

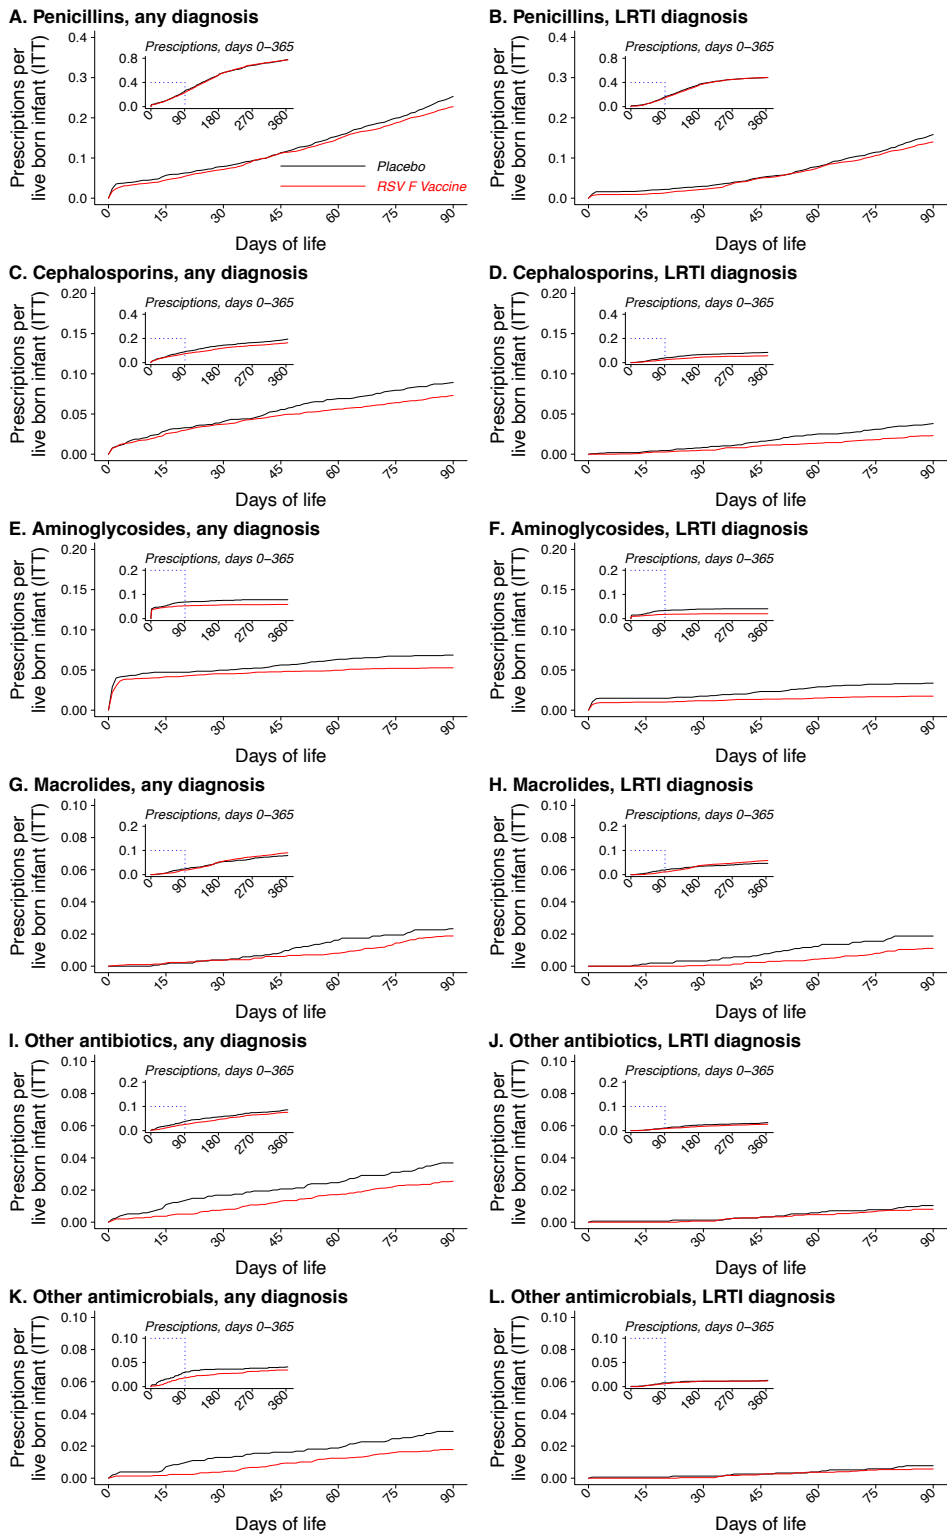

**Figure S1: Incidence of new antimicrobial prescription courses among infants within the intention-to-treat population, by drug class and linked diagnosis type.** We present cumulative incidence curves for all live-born infants within the intention-to-treat population and stratify data for by drug class. Red and black lines indicate observations among infants whose mothers were randomized to RSV F vaccine and placebo, respectively; inset panels plot data throughout the first year of life.

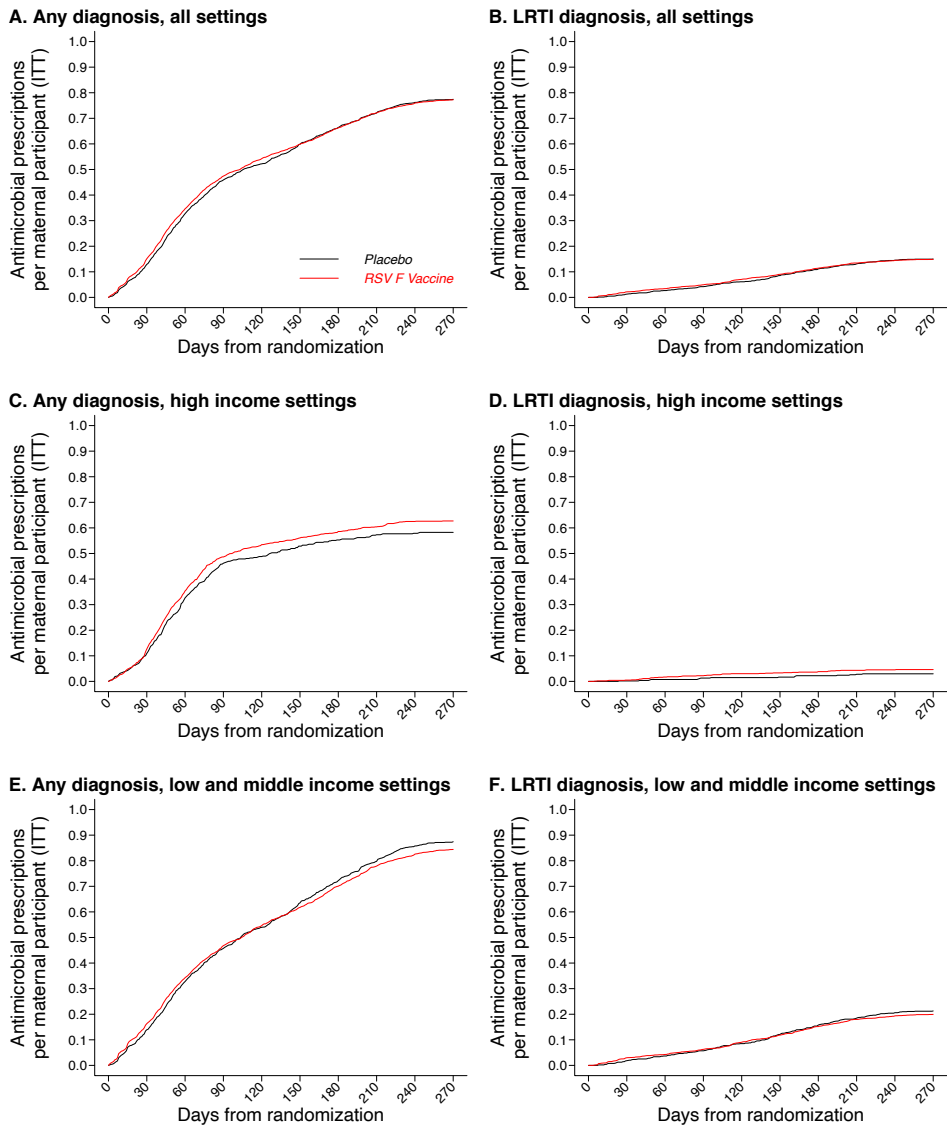

**Figure S2: Incidence of antimicrobial prescription courses among maternal participants within the intention-to-treat population, by setting and linked diagnosis type.** We present cumulative incidence curves for all maternal participants within the intention-to-treat population and stratify data for all countries (A, B), high-income countries (C, D), and low- and middle-income countries (E, F). Red and black lines indicate observations among maternal participants randomized to RSV F vaccine and placebo, respectively.

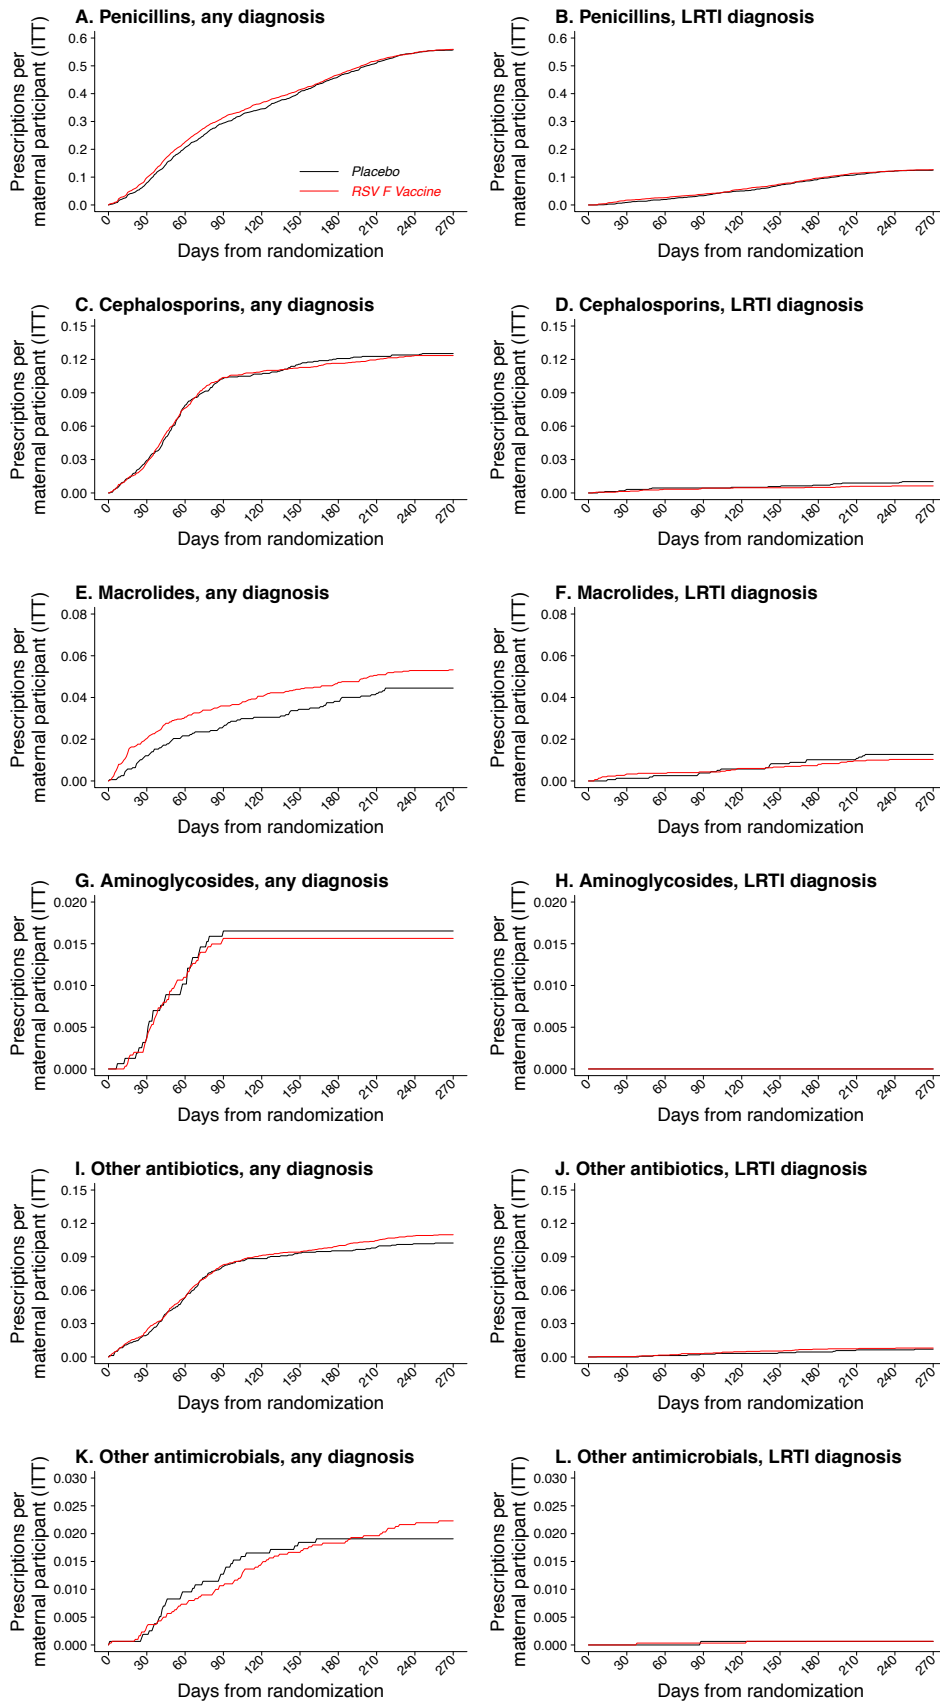

**Figure S3: Incidence of antimicrobial prescription courses among maternal participants within the intention-to-treat population, by drug class and linked diagnosis type.** Red and black lines indicate observations among maternal participants randomized to RSV F vaccine and placebo, respectively; inset panels plot data throughout the first year of life.
